# Supplementary material for: Ru(ii)-catalyzed cascade cis carbohalogenation and cyclization of alkyne-tethered cyclohexadienones for synthesizing tetrasubstituted alkenes
Source: Royal Society of Chemistry journal article supplement (doi:10.1039/d4qo00105b), 2024-01-01

## Supporting Information

### **Ru(II)-Catalyzed Cascade *cis* Carbohalogenation and Cyclization of Alkyne-tethered Cyclohexadienones for Tetrasubstituted Alkenes**

*Xiaoli Huang, Cui Yi, Ruji Xiong, Meiqi Bai, Yuhai Tang, Silong Xu and Yang Li\**  
*Email: [yanglee@mail.xjtu.edu.cn](mailto:yanglee@mail.xjtu.edu.cn)*

School of Chemistry and Xi'an Key Laboratory of Sustainable Energy Materials Chemistry,  
and School of Pharmacy, Health Science Center, Xi'an Jiaotong University, Xi'an 710049, P.

R. China.

## Contents

|                                                                                     |    |
|-------------------------------------------------------------------------------------|----|
| 1. General methods .....                                                            | 2  |
| 2. Synthesis of substrates .....                                                    | 2  |
| 3. Optimization of reaction conditions.....                                         | 2  |
| 4. General procedure for the <i>cis</i> Carbohalogenation .....                     | 4  |
| a) General procedure for the <i>cis</i> carbochlorination.....                      | 4  |
| b) General procedure for the <i>cis</i> carbobromination .....                      | 4  |
| c) General procedure for the <i>cis</i> carboiodination.....                        | 5  |
| d) General procedure for the <i>cis</i> carboxygenation .....                       | 5  |
| 5. Characterization data .....                                                      | 6  |
| a) Characterization data for compounds <b>2</b> .....                               | 6  |
| b) Characterization data for compounds <b>3</b> .....                               | 12 |
| c) Characterization data for compounds <b>4</b> .....                               | 19 |
| d) Characterization data for compounds <b>5</b> .....                               | 24 |
| 6. Determination the configuration of product <b>2a</b> and <b>3n</b> via NOE ..... | 32 |
| 7. Scale-up synthesis and synthetic transformations.....                            | 34 |
| 7.1 General procedure for Scale-up synthesis of compound <b>2a</b> .....            | 34 |
| 7.2 General procedure for Scale-up synthesis of compound <b>5a</b> .....            | 35 |
| 7.3 Procedure for synthesis of compound <b>2a-1</b> .....                           | 35 |
| 7.4 Procedure for synthesis of compound <b>5a-1</b> .....                           | 36 |
| 7.5 Procedure for synthesis of compound <b>6</b> .....                              | 36 |
| 7.6 Procedure for synthesis of compound <b>7</b> .....                              | 38 |
| 8. Crystal structural data .....                                                    | 40 |
| 8.1 Crystal structural data <b>2g</b> .....                                         | 40 |
| 8.2 Crystal structural data <b>3g</b> .....                                         | 41 |
| 8.3 Crystal structural data <b>4e</b> .....                                         | 43 |
| 8.4 Crystal structural data <b>5e</b> .....                                         | 44 |
| 9. References.....                                                                  | 45 |
| 10. NMR spectra of new compounds.....                                               | 47 |

## 1. General methods

All reactions and manipulations involving air-sensitive compounds were performed using standard Schlenk techniques. Melting points were measured on an SGW@X-4B apparatus and uncorrected.  $^1\text{H}$ ,  $^{13}\text{C}$  and  $^{19}\text{F}$  NMR spectra were recorded on Bruker AV400 or JNM-ECZ400S/L1 400 MHz spectrometers. Chemical shifts ( $\delta$  values) were reported in ppm with internal TMS ( $^1\text{H}$  NMR),  $\text{CDCl}_3$  ( $^{13}\text{C}$  NMR),  $\text{DMSO-d}_6$  ( $^{13}\text{C}$  NMR) or external  $\text{CF}_3\text{CO}_2\text{H}$  ( $^{19}\text{F}$  NMR) as references, respectively. HRMS (ESI) were determined on Agilent Technologies 6224 TOF LC/MS. IR spectra were measured on a NICOLET iS10 spectrometer. Single crystal X-ray diffraction data was recorded on Bruker D8 Venture or Bruker SMART CCD diffractometers. Column chromatography was performed on silica gel (200-300 mesh) using a mixture of petroleum ether (60-90  $^\circ\text{C}$ )/ethyl acetate as the eluent.

## 2. Synthesis of substrates

Alkyne-tethered cyclohexadienones **1** were synthesized according to the literature<sup>[1, 2]</sup> and all data were in agreement with those reported<sup>[1, 2]</sup>.

## 3. Optimization of reaction conditions

**Table S1** Optimization of the reaction conditions of *cis* carbobromination<sup>a</sup>

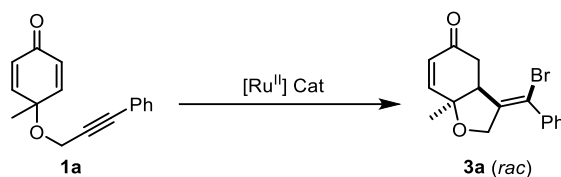

| Entry          | catalyst                                   | solvent | halide source                        | yield <b>3a</b> <sup>f</sup> (%) |
|----------------|--------------------------------------------|---------|--------------------------------------|----------------------------------|
| 1 <sup>b</sup> | $[\text{RuCl}_2(p\text{-cymene})]_2$       | Toluene | <sup>n</sup> Et <sub>4</sub> NBr     | 73 (>20:1)                       |
| 2              | $\text{Ru}(\text{OAc})_2(p\text{-cymene})$ | Toluene | <sup>n</sup> Et <sub>4</sub> NBr     | 83 (>20:1)                       |
| 3              | $\text{Ru}(\text{OAc})_2(p\text{-cymene})$ | Toluene | <sup>n</sup> Bu <sub>4</sub> NBr     | 85 (>20:1)                       |
| 4              | $\text{Ru}(\text{OAc})_2(p\text{-cymene})$ | Toluene | <sup>n</sup> Heptyl <sub>4</sub> NBr | 81 (>20:1)                       |
| 5 <sup>c</sup> | $\text{Ru}(\text{OAc})_2(p\text{-cymene})$ | Toluene | <sup>n</sup> Bu <sub>4</sub> NBr     | 79 (>20:1)                       |
| 6 <sup>d</sup> | $\text{Ru}(\text{OAc})_2(p\text{-cymene})$ | Toluene | <sup>n</sup> Bu <sub>4</sub> NBr     | 76 (>20:1)                       |
| 7 <sup>e</sup> | $\text{Ru}(\text{OAc})_2(p\text{-cymene})$ | Toluene | <sup>n</sup> Bu <sub>4</sub> NBr     | 66 (>20:1)                       |
| 8              | $\text{Ru}(\text{OAc})_2(p\text{-cymene})$ | Dioxane | <sup>n</sup> Bu <sub>4</sub> NBr     | 52 (>20:1)                       |
| 9              | $\text{Ru}(\text{OAc})_2(p\text{-cymene})$ | MeCN    | <sup>n</sup> Bu <sub>4</sub> NBr     | NR                               |
| 10             | $\text{Ru}(\text{OAc})_2(p\text{-cymene})$ | THF     | <sup>n</sup> Bu <sub>4</sub> NBr     | 86 (>20:1)                       |
| 11             | $\text{Ru}(\text{OAc})_2(p\text{-cymene})$ | PhCl    | <sup>n</sup> Bu <sub>4</sub> NBr     | 91 (>20:1)                       |
| 12             | $\text{Ru}(\text{OAc})_2(p\text{-cymene})$ | EtOH    | <sup>n</sup> Bu <sub>4</sub> NB      | 49 (>20:1)                       |

<sup>a</sup> Reaction conditions: Ru(OAc)<sub>2</sub>(*p*-cymene) (10 mol%), **1a** (0.1 mmol), halide source (2.0 equiv), HOAc (20.0 equiv), solvent (1.0 mL) at 100 °C under N<sub>2</sub> for 24 h; <sup>b</sup> [RuCl<sub>2</sub>(*p*-cymene)]<sub>2</sub> (5 mol%); <sup>c</sup> HOAc (10.0 equiv); <sup>d</sup> <sup>n</sup>Bu<sub>4</sub>NBr (1.5 equiv); <sup>e</sup> <sup>n</sup>Bu<sub>4</sub>NBr (3.0 equiv); <sup>f</sup> All *E/Z* ratios were determined by <sup>1</sup>H NMR.

**Table S2** Optimization of the reaction conditions of *cis* carboiodination<sup>a</sup>

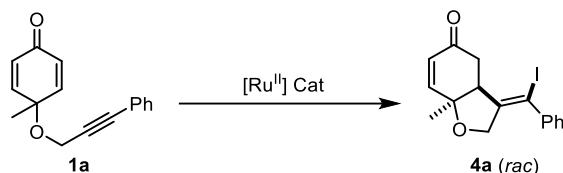

| Entry          | catalyst                                            | solvent | halide source                       | yield <b>4a</b> <sup>f</sup> (%) |
|----------------|-----------------------------------------------------|---------|-------------------------------------|----------------------------------|
| 1 <sup>b</sup> | [RuI <sub>2</sub> ( <i>p</i> -cymene)] <sub>2</sub> | Toluene | <sup>n</sup> Et <sub>4</sub> NI     | 53 (>20:1)                       |
| 2 <sup>b</sup> | [RuI <sub>2</sub> ( <i>p</i> -cymene)] <sub>2</sub> | Toluene | <sup>n</sup> Bu <sub>4</sub> NI     | 72 (>20:1)                       |
| 3 <sup>b</sup> | [RuI <sub>2</sub> ( <i>p</i> -cymene)] <sub>2</sub> | Toluene | <sup>n</sup> Heptyl <sub>4</sub> NI | 67 (>20:1)                       |
| 4              | Ru(OAc) <sub>2</sub> ( <i>p</i> -cymene)            | Toluene | <sup>n</sup> Bu <sub>4</sub> NI     | 91 (>20:1)                       |
| 5 <sup>c</sup> | Ru(OAc) <sub>2</sub> ( <i>p</i> -cymene)            | Toluene | <sup>n</sup> Bu <sub>4</sub> NI     | 58 (>20:1)                       |
| 6 <sup>d</sup> | Ru(OAc) <sub>2</sub> ( <i>p</i> -cymene)            | Toluene | <sup>n</sup> Bu <sub>4</sub> NI     | 79 (>20:1)                       |
| 7 <sup>e</sup> | Ru(OAc) <sub>2</sub> ( <i>p</i> -cymene)            | Toluene | <sup>n</sup> Bu <sub>4</sub> NI     | 75 (>20:1)                       |
| 8              | Ru(OAc) <sub>2</sub> ( <i>p</i> -cymene)            | Dioxane | <sup>n</sup> Bu <sub>4</sub> NI     | 80 (>20:1)                       |
| 9              | Ru(OAc) <sub>2</sub> ( <i>p</i> -cymene)            | MeCN    | <sup>n</sup> Bu <sub>4</sub> NI     | NR                               |
| 10             | Ru(OAc) <sub>2</sub> ( <i>p</i> -cymene)            | THF     | <sup>n</sup> Bu <sub>4</sub> NI     | 74 (>20:1)                       |
| 11             | Ru(OAc) <sub>2</sub> ( <i>p</i> -cymene)            | PhCl    | <sup>n</sup> Bu <sub>4</sub> NI     | 74 (>20:1)                       |

<sup>a</sup> Reaction conditions: Catalyst (10 mol%), **1a** (0.1 mmol), halide source (2.0 equiv), HOAc (20.0 equiv), solvent (1.0 mL) at 100 °C under N<sub>2</sub> for 48 h; <sup>b</sup> [RuI<sub>2</sub>(*p*-cymene)]<sub>2</sub> (5 mol%); <sup>c</sup> HOAc (10.0 equiv); <sup>d</sup> <sup>n</sup>Bu<sub>4</sub>NI (1.5 equiv); <sup>e</sup> <sup>n</sup>Bu<sub>4</sub>NI (3.0 equiv); <sup>f</sup> All *E/Z* ratios were determined by <sup>1</sup>H NMR.

**Table S3** Optimization of the reaction conditions of *cis* carboxygenation<sup>a</sup>

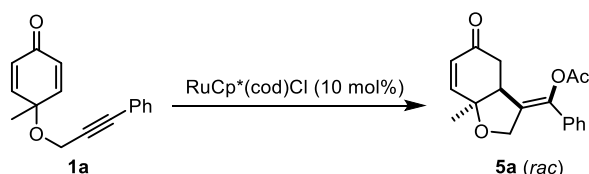

| Entry           | Solvent | Additive | T (°C) | yield <b>5a</b> <sup>d</sup> (%) |
|-----------------|---------|----------|--------|----------------------------------|
| 1               | DCE     | AgOAc    | 40     | 53 (>20:1)                       |
| 2               | DCE     | AgOAc    | 60     | 90 (>20:1)                       |
| 3               | DCE     | AgOAc    | 80     | 80 (>20:1)                       |
| 4               | PhCl    | AgOAc    | 60     | 77 (>20:1)                       |
| 5               | Dioxane | AgOAc    | 60     | 88 (>20:1)                       |
| 6               | MeCN    | AgOAc    | 60     | 11 (>20:1)                       |
| 7               | Toluene | AgOAc    | 60     | 41 (>20:1)                       |
| 8               | EtOH    | AgOAc    | 60     | 17 (>20:1)                       |
| 9               | THF     | AgOAc    | 60     | 92 (>20:1)                       |
| 10 <sup>b</sup> | THF     | AgOAc    | 60     | 83 (>20:1)                       |
| 11 <sup>c</sup> | THF     | AgOAc    | 60     | 80 (>20:1)                       |
| 12              | THF     | NaOAc    | 60     | 79 (>20:1)                       |



<sup>a</sup> Reaction conditions: RuCp\*(cod)Cl (10 mol%), **1a** (0.1 mmol), additive (0.5 equiv), HOAc (20.0 equiv), solvent (1.0 mL) at 60 °C under N<sub>2</sub> for 15 h; <sup>b</sup> AgOAc (0.2 equiv); <sup>c</sup> HOAc (10.0 equiv); <sup>d</sup> All *E/Z* ratios were determined by <sup>1</sup>H NMR.

## 4. General procedure for the *cis* Carbohalogenation

### a) General procedure for the *cis* carbochlorination

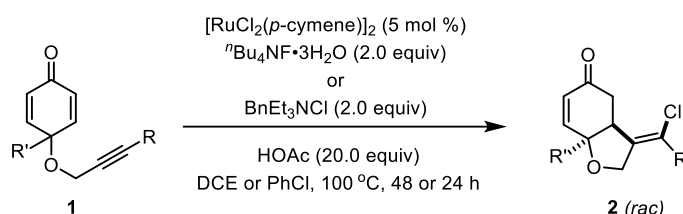

A sealed tube (25 mL) charged with a stir bar was added [RuCl<sub>2</sub>(*p*-cymene)]<sub>2</sub> (6.2 mg, 0.01 mmol, 5 mol%), alkynes **1** (0.20 mmol, 1.0 equiv) and <sup>n</sup>Bu<sub>4</sub>NF·3H<sub>2</sub>O (126.2 mg, 0.40 mmol, 2.0 equiv) or BnEt<sub>3</sub>NCl (91.1 mg, 0.40 mmol, 2.0 equiv). The tube was purged three times by vacuum and N<sub>2</sub>, then anhydrous DCE (4.0 mL, 0.05 M) or PhCl (4.0 mL, 0.05 M) was added. At last, glacial HOAc (229 μL, 4.0 mmol, 20.0 equiv) was added and the resulted mixture was stirred and heated at 100 °C in an oil bath for 48 or 24 h. Upon completion, the reaction mixture was cooled to room temperature, and quenched with aqueous saturated NaHCO<sub>3</sub> and then extracted with EtOAc (20 mL × 3), and then dried over anhydrous Na<sub>2</sub>SO<sub>4</sub>, filtered and concentrated in vacuo. The residue was purified by column chromatography using petroleum ether/ethyl acetate mixture as the eluent, which afforded the carbochlorination products **2**.

### b) General procedure for the *cis* carbobromination

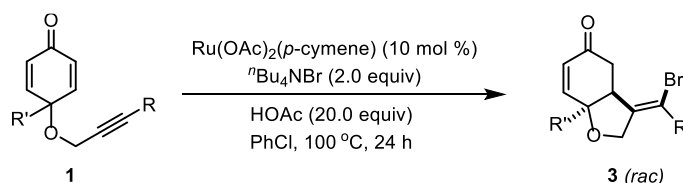

A sealed tube (25 mL) charged with a stir bar was added Ru(OAc)<sub>2</sub>(*p*-cymene) (7.1 mg, 0.02 mmol, 10 mol%), alkynes **1** (0.20 mmol, 1.0 equiv) and <sup>n</sup>Bu<sub>4</sub>NBr (128.9 mg, 0.40 mmol, 2.0 equiv). The tube was purged three times by vacuum and N<sub>2</sub>, then anhydrous PhCl (2.0 mL, 0.1 M) was added. At last, glacial HOAc (229 μL, 4.0 mmol, 20.0 equiv)

was added and the resulted mixture was stirred and heated at 100 °C in an oil bath for 24 h. Upon completion, the reaction mixture was cooled to room temperature, and quenched with aqueous saturated NaHCO<sub>3</sub> and then extracted with EtOAc (20 mL × 3), and then dried over anhydrous Na<sub>2</sub>SO<sub>4</sub>, filtered and concentrated in vacuo. The residue was purified by column chromatography using petroleum ether/ethyl acetate mixture as the eluent, which afforded carbobromination products **3**.

### c) General procedure for the *cis* carboiodination

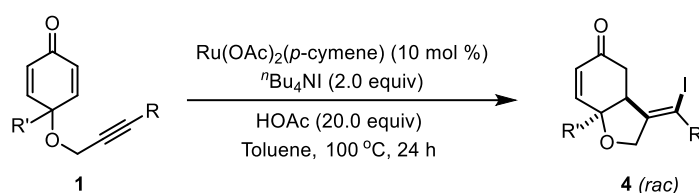

A sealed tube (25 mL) charged with a stir bar was added [Ru(OAc)<sub>2</sub>(*p*-cymene)] (7.1 mg, 0.02 mmol, 10 mol%), alkynes **1** (0.20 mmol, 1.0 equiv) and *t*Bu<sub>4</sub>NI (147.7 mg, 0.40 mmol, 2.0 equiv). The tube was purged three times by vacuum and N<sub>2</sub>, then anhydrous toluene (2.0 mL, 0.1 M) was added. At last, glacial HOAc (229 μL, 4.0 mmol, 20.0 equiv) was added and the resulted mixture was stirred and heated at 100 °C in an oil bath for 48 h. Upon completion, the reaction mixture was cooled to room temperature, and quenched with aqueous saturated NaHCO<sub>3</sub> and then extracted with EtOAc (20 mL × 3), and then dried over anhydrous Na<sub>2</sub>SO<sub>4</sub>, filtered and concentrated in vacuo. The residue was purified by column chromatography using petroleum ether/ethyl acetate mixture as eluent, which afforded carboiodination products **4**.

### d) General procedure for the *cis* carboxygenation

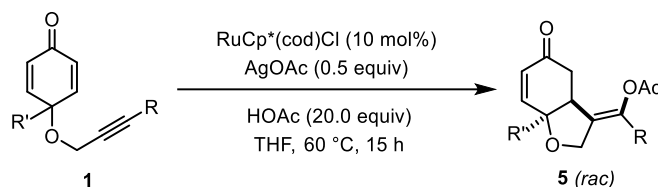

A sealed tube (25 mL) charged with a stir bar was added RuCp\*(cod)Cl (7.6 mg, 0.02 mmol, 10 mol%), alkynes **1** (0.20 mmol, 1.0 equiv) and AgOAc (16.7 mg, 0.1 mmol, 0.5 equiv). The tube was purged three times by vacuum and N<sub>2</sub>, then anhydrous THF

(2.0 mL, 0.1 M) was added. At last, glacial HOAc (229  $\mu$ L, 4.0 mmol, 20.0 equiv) was added and the resulted mixture was stirred and heated at 60  $^{\circ}$ C in an oil bath for 15 h. Upon completion, the reaction mixture was cooled to room temperature, and quenched with aqueous saturated NaHCO<sub>3</sub> and then extracted with EtOAc (20 mL  $\times$  3), and then dried over anhydrous Na<sub>2</sub>SO<sub>4</sub>, filtered and concentrated in vacuo. The residue was purified by column chromatography using petroleum ether/ethyl acetate mixture as eluent, which afforded carboxygenation products **5**.

## 5. Characterization data

### a) Characterization data for compounds **2**

#### **(E)**-3-(chloro(phenyl)methylene)-7a-methyl-2,3,3a,7a-tetrahydrobenzofuran-5(4H)-one, **2a**

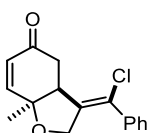

Light yellow solid, 47.2 mg, 86% yield, PE : EtOAc = 5:1, M.p. 79 – 81  $^{\circ}$ C. <sup>1</sup>H NMR (400 MHz, CDCl<sub>3</sub>)  $\delta$  7.36 – 7.30 (m, 3H), 7.30 – 7.28 (m, 2H), 6.56 (dd,  $J$  = 10.1, 0.8 Hz, 1H), 6.14 (d,  $J$  = 10.1 Hz, 1H), 4.38 (dd,  $J$  = 13.2, 1.9 Hz, 1H), 4.23 (d,  $J$  = 13.1 Hz, 1H), 3.33 – 3.28 (m, 2H), 2.74 – 2.68 (m, 1H), 1.55 (s, 3H) ppm; <sup>13</sup>C NMR (100 MHz, CDCl<sub>3</sub>)  $\delta$  197.4, 149.8, 139.0, 137.8, 130.4, 129.1, 128.5, 127.9, 126.4, 79.8, 69.6, 49.1, 36.4, 24.0 ppm; FTIR (neat)  $\nu$  3027, 1680, 1489, 1091, 1009, 766 cm<sup>-1</sup>; HRMS (ESI)  $m/z$ : Calcd. For C<sub>16</sub>H<sub>16</sub>ClO<sub>2</sub><sup>+</sup>: 275.0833, Found: 275.0831 (M+H<sup>+</sup>).

#### **(E)**-3-(chloro(*p*-tolyl)methylene)-7a-methyl-2,3,3a,7a-tetrahydrobenzofuran-5(4H)-one, **2b**

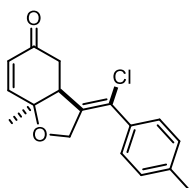

Light yellow semisolid, 52.5 mg, 91% yield, PE : EtOAc = 5:1. <sup>1</sup>H NMR (400 MHz, CDCl<sub>3</sub>)  $\delta$  7.21 – 7.13 (m, 4H), 6.55 (d,  $J$  = 10.5 Hz, 1H), 6.13 (d,  $J$  = 10.5 Hz, 1H), 4.37

(dd,  $J = 13.1, 1.8$  Hz, 1H), 4.22 (d,  $J = 13.1$  Hz, 1H), 3.33 – 3.27 (m, 2H), 2.70 (dd,  $J = 17.9, 7.5$  Hz, 1H), 2.35 (s, 3H), 1.54 (s, 3H) ppm;  $^{13}\text{C}$  NMR (100 MHz,  $\text{CDCl}_3$ )  $\delta$  197.5, 149.8, 139.1, 138.3, 135.0, 130.4, 129.1, 127.8, 126.5, 79.7, 69.6, 49.0, 36.3, 24.0, 21.3 ppm; FTIR (neat)  $\nu$  2846, 1677, 1450, 1121, 1045, 809, 717  $\text{cm}^{-1}$ ; HRMS (ESI)  $m/z$ : Calcd.  $\text{C}_{17}\text{H}_{18}\text{ClO}_2^+$ : 289.0990, Found: 289.0974 ( $\text{M}+\text{H}^+$ ).

**(*E*)-3-(chloro(4-fluorophenyl)methylene)-7a-methyl-2,3,3a,7a-tetrahydrobenzo-furan-5(4*H*)-one, 2c**

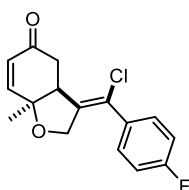

Light yellow semisolid, 29.8 mg, 51% yield, PE : EtOAc = 5:1.  $^1\text{H}$  NMR (400 MHz,  $\text{CDCl}_3$ )  $\delta$  7.30 – 7.26 (m, 2H), 7.07 – 7.01 (m, 2H), 6.55 (dd,  $J = 10.3, 1.0$  Hz, 1H), 6.14 (d,  $J = 10.3$  Hz, 1H), 4.34 (dd,  $J = 13.1, 2.0$  Hz, 1H), 4.19 (d,  $J = 13.1$  Hz, 1H), 3.32 – 3.29 (m, 2H), 2.70 (dd,  $J = 17.7, 7.3$  Hz, 1H), 1.55 (s, 3H) ppm;  $^{13}\text{C}$  NMR (100 MHz,  $\text{CDCl}_3$ )  $\delta$  197.3, 162.8 (d,  $J = 249.6$  Hz), 149.8, 139.2, 134.0 (d,  $J = 2.9$  Hz), 130.5, 129.9 (d,  $J = 8.5$  Hz), 125.4, 115.6 (d,  $J = 21.7$  Hz), 79.9, 69.5, 49.1, 36.3, 24.0 ppm;  $^{19}\text{F}$  NMR (376 MHz,  $\text{CDCl}_3$ )  $\delta$  -111.1 ppm; FTIR (neat)  $\nu$  2924, 1682, 1600, 1506, 1229, 1091, 834  $\text{cm}^{-1}$ ; HRMS (ESI)  $m/z$ : Calcd. For  $\text{C}_{16}\text{H}_{14}\text{ClFO}_2\text{Na}^+$ : 315.0559, Found: 315.0570 ( $\text{M}+\text{Na}^+$ ).

**(*E*)-3-(chloro(4-chlorophenyl)methylene)-7a-methyl-2,3,3a,7a-tetrahydrobenzo-furan-5(4*H*)-one, 2d**

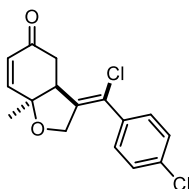

Light yellow solide, 47.5 mg, 77% yield, PE : EtOAc = 5:1, M.p. 97 – 99 °C.  $^1\text{H}$  NMR (400 MHz,  $\text{CDCl}_3$ )  $\delta$  7.33 (d,  $J = 8.5$  Hz, 2H), 7.23 (d,  $J = 8.5$  Hz, 2H), 6.56 (d,  $J = 10.8$  Hz, 1H), 6.14 (d,  $J = 10.8$  Hz, 1H), 4.35 (dd,  $J = 13.2, 1.9$  Hz, 1H), 4.20 (d,  $J = 13.2$  Hz, 1H), 3.33 – 3.28 (m, 2H), 2.70 (dd,  $J = 17.6, 7.3$  Hz, 1H), 1.55 (s, 3H) ppm;  $^{13}\text{C}$  NMR (100 MHz,  $\text{CDCl}_3$ )  $\delta$  197.3, 149.8, 139.8, 136.2, 135.0, 130.5, 129.3, 128.8,

125.3, 79.9, 69.5, 49.2, 36.3, 24.0 ppm; FTIR (neat)  $\nu$  2920, 1681, 1488, 1091, 1042, 858, 745  $\text{cm}^{-1}$ ; HRMS (ESI)  $m/z$ : Calcd. For  $\text{C}_{16}\text{H}_{14}\text{Cl}_2\text{O}_2\text{Na}^+$ : 331.0263, Found: 331.0275 ( $\text{M}+\text{Na}^+$ ).

**(E)-3-((4-bromophenyl)chloromethylene)-7a-methyl-2,3,3a,7a-tetrahydrobenzofuran-5(4H)-one, 2e**

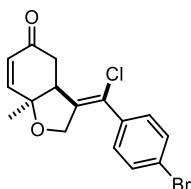

Light yellow solid, 50 mg, 71% yield, PE : EtOAc = 5:1, M.p. 99 – 101 °C.  $^1\text{H}$  NMR (400 MHz,  $\text{CDCl}_3$ )  $\delta$  7.50 – 7.47 (m, 2H), 7.18 – 7.15 (m, 2H), 6.55 (dd,  $J = 10.3, 0.9$  Hz, 1H), 6.14 (d,  $J = 10.3$  Hz, 1H), 4.34 (dd,  $J = 13.2, 2.0$  Hz, 1H), 4.19 (d,  $J = 13.2$  Hz, 1H), 3.33 – 3.28 (m, 2H), 2.70 (dd,  $J = 17.7, 7.3$  Hz, 1H), 1.55 (s, 3H) ppm;  $^{13}\text{C}$  NMR (100 MHz,  $\text{CDCl}_3$ )  $\delta$  197.3, 149.8, 139.8, 136.7, 131.7, 130.5, 129.5, 125.3, 123.3, 79.9, 69.5, 49.2, 36.3, 23.9 ppm; FTIR (neat)  $\nu$  3336, 2921, 1678, 1478, 1388, 1092, 1011, 835,  $\text{cm}^{-1}$ ; HRMS (ESI)  $m/z$ : Calcd. For  $\text{C}_{16}\text{H}_{15}\text{BrClNO}_2^+$ : 352.9939, Found: 352.9947 ( $\text{M}+\text{H}^+$ ).

**(E)-methyl 4-(chloro(7a-methyl-5-oxo-3a,4,5,7a-tetrahydrobenzofuran-3(2H)-ylidene)methyl)benzoate, 2f**

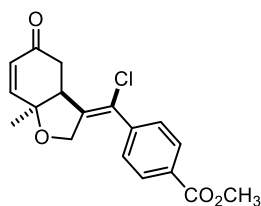

Off-white solide, 49.8 mg, 75% yield, PE : EtOAc = 5:1, M.p. 118 – 119 °C.  $^1\text{H}$  NMR (400 MHz,  $\text{CDCl}_3$ )  $\delta$  8.03 – 8.01 (m, 2H), 7.38 – 7.36 (m, 2H), 6.57 (d,  $J = 10.2$  Hz, 1H), 6.15 (d,  $J = 10.2$  Hz, 1H), 4.39 (dd,  $J = 13.3, 1.8$  Hz, 1H), 4.22 (d,  $J = 13.3$  Hz, 1H), 3.93 (s, 3H), 3.34 – 3.29 (m, 2H), 2.76 – 2.70 (m, 1H), 1.56 (s, 3H) ppm;  $^{13}\text{C}$  NMR (100 MHz,  $\text{CDCl}_3$ )  $\delta$  197.1, 166.4, 149.7, 141.9, 140.9, 130.5, 129.7, 127.9, 125.3, 79.8, 69.4, 52.4, 49.3, 36.3, 23.9 ppm; FTIR (neat)  $\nu$  2918, 1720, 1665, 1276, 1078, 864, 769,  $\text{cm}^{-1}$ ; HRMS (ESI)  $m/z$ : Calcd. For  $\text{C}_{18}\text{H}_{18}\text{ClO}_4^+$ : 333.0888, Found: 333.0894 ( $\text{M}+\text{H}^+$ ).

**(E)-3-(chloro(4-nitrophenyl)methylene)-7a-methyl-2,3,3a,7a-tetrahydrobenzo-**

**furan-5(4*H*)-one, 2g**

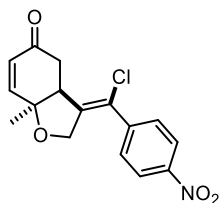

Light yellow solid, 40.8 mg, 64% yield, PE : EtOAc = 5:1, M.p. 189 – 190 °C. <sup>1</sup>H NMR (400 MHz, CDCl<sub>3</sub>) δ 8.24 – 8.21 (m, 2H), 7.49 – 7.47 (m, 2H), 6.57 (dd, *J* = 10.3, 0.9 Hz, 1H), 6.17 (d, *J* = 10.3 Hz, 1H), 4.39 (dd, *J* = 13.3, 1.9 Hz, 1H), 4.22 (d, *J* = 13.3 Hz, 1H), 3.35 – 3.30 (m, 2H), 2.77 – 2.70 (m, 1H), 1.58 (s, 3H) ppm; <sup>13</sup>C NMR (100 MHz, CDCl<sub>3</sub>) δ 196.8, 149.6, 147.8, 143.8, 142.7, 130.6, 128.9, 124.2, 123.8, 80.0, 69.4, 49.6, 36.3, 23.9 ppm; FTIR (neat) ν 2918, 1680, 1508, 1345, 1117, 1012, 864 cm<sup>-1</sup>; HRMS (ESI) *m/z*: Calcd. For C<sub>16</sub>H<sub>14</sub>ClNO<sub>4</sub>Na<sup>+</sup>: 342.0504, Found: 342.0516 (M+Na<sup>+</sup>).

**(*E*)-3-(chloro(3-chlorophenyl)methylene)-7a-methyl-2,3,3a,7a-tetrahydrobenzo-furan-5(4*H*)-one, 2h**

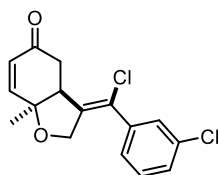

Yellow liquid, 31.4 mg, 51% yield, PE : EtOAc = 5:1. <sup>1</sup>H NMR (400 MHz, CDCl<sub>3</sub>) δ 7.30 – 7.27 (m, 2H), 7.16 (dt, *J* = 6.6, 1.9 Hz, 1H), 6.56 (d, *J* = 10.3 Hz, 1H), 6.15 (d, *J* = 10.3 Hz, 1H), 4.36 (dd, *J* = 13.2, 1.8 Hz, 1H), 4.22 (d, *J* = 13.2 Hz, 1H), 3.31 – 3.27 (m, 2H), 2.71 (dd, *J* = 18.3, 7.8 Hz, 1H), 1.55 (s, 3H) ppm; <sup>13</sup>C NMR (100 MHz, CDCl<sub>3</sub>) δ 197.2, 149.8, 140.4, 139.5, 134.5, 130.5, 129.8, 129.3, 128.1, 126.1, 124.9, 79.9, 69.5, 49.2, 36.3, 24.0 ppm; FTIR (neat) ν 3359, 2928, 1681, 1565, 1411, 1217, 1041, 868, 785 cm<sup>-1</sup>; HRMS (ESI) *m/z*: Calcd. For C<sub>16</sub>H<sub>14</sub>Cl<sub>2</sub>O<sub>2</sub>Na<sup>+</sup>: 331.0263, Found: 331.0276 (M+Na<sup>+</sup>).

**(*E*)-3-(chloro(thiophen-3-yl)methylene)-7a-methyl-2,3,3a,7a-tetrahydrobenzo-furan-5(4*H*)-one, 2i**

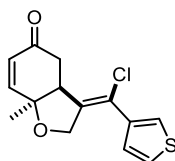

Light yellow semisolid, 25.8 mg, 46% yield, PE : EtOAc = 5:1.  $^1\text{H}$  NMR (400 MHz,  $\text{CDCl}_3$ )  $\delta$  7.31 (dd,  $J = 5.0, 3.0$  Hz, 1H), 7.25 (dd,  $J = 2.9, 1.1$  Hz, 1H), 7.09 (dd,  $J = 5.1, 1.2$  Hz, 1H), 6.59 (d,  $J = 10.2$  Hz, 1H), 6.12 (d,  $J = 10.2$  Hz, 1H), 4.46 (s, 2H), 3.34 (t,  $J = 5.5$  Hz, 1H), 3.21 (dd,  $J = 16.7, 5.5$  Hz, 1H), 2.72 (dd,  $J = 16.7, 6.3$  Hz, 1H), 1.53 (s, 3H) ppm;  $^{13}\text{C}$  NMR (100 MHz,  $\text{CDCl}_3$ )  $\delta$  197.5, 149.5, 138.6, 138.3, 130.4, 127.0, 126.0, 124.7, 121.6, 79.5, 69.8, 49.3, 36.5, 24.1 ppm; FTIR (neat)  $\nu$  3055, 1682, 1420, 1264, 1041, 895, 731  $\text{cm}^{-1}$ ; HRMS (ESI)  $m/z$ : Calcd. For  $\text{C}_{14}\text{H}_{13}\text{ClSO}_2\text{Na}^+$ : 303.0217, Found: 303.0207 ( $\text{M}+\text{Na}^+$ ).

**(*E*)-3-(chloro(thiophen-2-yl)methylene)-7a-methyl-2,3,3a,7a-tetrahydrobenzofuran-5(4*H*)-one, 2j**

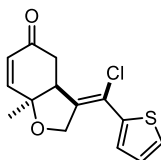

Red-brown semisolid, 37.6 mg, 67% yield, PE : EtOAc = 5:1.  $^1\text{H}$  NMR (400 MHz,  $\text{CDCl}_3$ )  $\delta$  7.36 (dd,  $J = 5.1, 1.2$  Hz, 1H), 7.07 (dd,  $J = 3.8, 0.9$  Hz, 1H), 7.03 (dd,  $J = 5.1, 3.8$  Hz, 1H), 6.60 (d,  $J = 10.2$  Hz, 1H), 6.11 (d,  $J = 10.2$  Hz, 1H), 4.61 (d,  $J = 13.8$  Hz, 1H), 4.53 (dd,  $J = 13.8, 2.1$  Hz, 1H), 3.38 (td,  $J = 6.3, 1.8$  Hz, 1H), 3.12 (dd,  $J = 16.6, 6.3$  Hz, 1H), 2.73 (dd,  $J = 16.6, 6.2$  Hz, 1H), 1.52 (s, 3H) ppm;  $^{13}\text{C}$  NMR (100 MHz,  $\text{CDCl}_3$ )  $\delta$  197.3, 149.1, 140.4, 138.5, 130.3, 127.5, 127.4, 127.2, 120.0, 79.4, 69.9, 49.9, 36.5, 24.2 ppm; FTIR (neat)  $\nu$  3055, 1680, 1414, 1264, 1040, 816, 732  $\text{cm}^{-1}$ ; HRMS (ESI)  $m/z$ : Calcd. For  $\text{C}_{14}\text{H}_{13}\text{ClO}_2\text{SNa}^+$ : 303.0217, Found: 303.0228 ( $\text{M}+\text{Na}^+$ ).

**(*E*)-3-(1-chloroethylidene)-7a-methyl-2,3,3a,7a-tetrahydrobenzofuran-5(4*H*)-one, 2k**

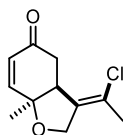

Light yellow liquid, 33.1 mg, 78% yield, PE : EtOAc = 5:1.  $^1\text{H}$  NMR (400 MHz,  $\text{CDCl}_3$ )  $\delta$  6.54 (d,  $J = 10.2$  Hz, 1H), 6.04 (d,  $J = 10.2$  Hz, 1H), 4.41 (d,  $J = 12.8$  Hz, 1H), 4.24 (d,  $J = 12.8$  Hz, 1H), 3.17 – 3.11 (m, 2H), 2.62 (dd,  $J = 18.3, 7.7$  Hz, 1H), 2.00 (s, 3H), 1.48 (s, 3H) ppm;  $^{13}\text{C}$  NMR (100 MHz,  $\text{CDCl}_3$ )  $\delta$  197.8, 149.6, 135.8, 130.1, 123.0,

80.1, 68.9, 48.1, 36.6, 23.90, 23.88 ppm; FTIR (neat)  $\nu$  2987, 1702, 1609, 1499, 1264, 896, 731  $\text{cm}^{-1}$ ; HRMS (ESI)  $m/z$ : Calcd. For  $\text{C}_{11}\text{H}_{14}\text{ClO}_2^+$ : 213.0677, Found: 213.0696 ( $\text{M}+\text{H}^+$ ).

**(E)-3-(chloro(phenyl)methylene)-7a-ethyl-2,3,3a,7a-tetrahydrobenzofuran-5(4H)-one, 2l**

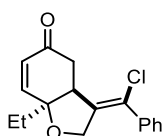

Light yellow liquid, 37.4 mg, 65% yield, PE : EtOAc = 5:1.  $^1\text{H}$  NMR (400 MHz,  $\text{CDCl}_3$ )  $\delta$  7.35 – 7.28 (m, 5H), 6.58 (dd,  $J = 10.2, 0.8$  Hz, 1H), 6.21 (d,  $J = 10.2$  Hz, 1H), 4.37 (dd,  $J = 13.1, 2.1$  Hz, 1H), 4.21 (d,  $J = 13.1$  Hz, 1H), 3.42 – 3.39 (m, 1H), 3.27 (dd,  $J = 16.9, 4.2$  Hz, 1H), 2.70 (dd,  $J = 16.9, 6.8$  Hz, 1H), 1.87 – 1.83 (m, 2H), 1.05 (t,  $J = 7.5$  Hz, 3H) ppm;  $^{13}\text{C}$  NMR (100 MHz,  $\text{CDCl}_3$ )  $\delta$  197.7, 148.9, 139.5, 137.8, 131.3, 129.1, 128.5, 127.9, 126.3, 82.2, 69.3, 46.8, 36.9, 30.8, 8.3 ppm; FTIR (neat)  $\nu$  2934, 1682, 1491, 1381, 1054, 858, 758  $\text{cm}^{-1}$ ; HRMS (ESI)  $m/z$ : Calcd. For  $\text{C}_{17}\text{H}_{18}\text{ClO}_2^+$ : 289.0990, Found: 289.0984 ( $\text{M}+\text{H}^+$ ).

**(E)-3-(chloro(phenyl)methylene)-7a-isopropyl-2,3,3a,7a-tetrahydrobenzofuran-5(4H)-one, 2m**

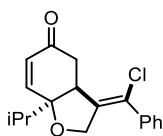

Light yellow liquid, 52.5 mg, 87% yield, PE : EtOAc = 5:1.  $^1\text{H}$  NMR (400 MHz,  $\text{CDCl}_3$ )  $\delta$  7.37 – 7.32 (m, 3H), 7.30 – 7.26 (m, 2H), 6.57 (dd,  $J = 10.4, 0.8$  Hz, 1H), 6.27 (d,  $J = 10.4$  Hz, 1H), 4.33 (dd,  $J = 12.9, 1.9$  Hz, 1H), 4.19 (d,  $J = 12.9$  Hz, 1H), 3.48 – 3.46 (m, 1H), 3.23 (dd,  $J = 17.2, 3.6$  Hz, 1H), 2.70 (dd,  $J = 17.2, 7.2$  Hz, 1H), 2.12 – 2.04 (m, 1H), 1.05 (dd,  $J = 11.5, 6.9$  Hz, 6H) ppm;  $^{13}\text{C}$  NMR (100 MHz,  $\text{CDCl}_3$ )  $\delta$  197.9, 147.6, 140.2, 137.8, 132.0, 129.1, 128.4, 128.0, 126.1, 84.3, 68.8, 44.8, 37.9, 35.7, 17.5, 17.1 ppm; FTIR (neat)  $\nu$  3058, 1683, 1464, 1386, 1221, 1053, 888, 786  $\text{cm}^{-1}$ ; HRMS (ESI)  $m/z$ : Calcd. For  $\text{C}_{18}\text{H}_{20}\text{ClO}_2^+$ : 303.1146, Found: 303.1144 ( $\text{M}+\text{H}^+$ ).

**(E)-3-(chloro(phenyl)methylene)-7,7a-dimethyl-2,3,3a,7a-tetrahydrobenzo-**



**furan-5(4*H*)-one, 2n**

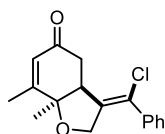

Off-white solid, 46.7 mg, 81% yield, PE : EtOAc = 5:1, M.p. 103 – 104 °C. <sup>1</sup>H NMR (400 MHz, CDCl<sub>3</sub>) δ 7.37 – 7.27 (m, 5H), 6.04 (s, 1H), 4.22 – 4.14 (m, 2H), 3.44 (dd, *J* = 17.1, 3.5 Hz, 1H), 3.29 – 3.28 (m, 1H), 2.68 (dd, *J* = 17.1, 6.4 Hz, 1H), 2.00 (s, 3H), 1.57 (s, 3H) ppm; <sup>13</sup>C NMR (100 MHz, CDCl<sub>3</sub>) δ 196.8, 160.2, 138.8, 138.0, 129.3, 129.0, 128.5, 127.9, 126.3, 82.3, 69.6, 50.1, 36.1, 22.5, 18.2 ppm; FTIR (neat) ν 2919, 1667, 1443, 1171, 1098, 1021, 760 cm<sup>-1</sup>; HRMS (ESI) *m/z*: Calcd. For C<sub>17</sub>H<sub>18</sub>ClO<sub>2</sub><sup>+</sup>: 289.0990, Found: 289.0991 (M+H<sup>+</sup>).

**(*E*)-3-(1-chloro-3-phenylprop-2-yn-1-ylidene)-7a-methyl-2,3,3a,7a-tetrahydrobenzofuran-5(4*H*)-one, 2o**

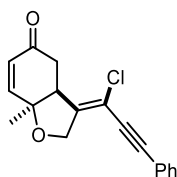

Light yellow liquid, 25.2 mg, 42% yield, PE : EtOAc = 5:1. <sup>1</sup>H NMR (400 MHz, CDCl<sub>3</sub>) δ 7.46 – 7.43 (m, 2H), 7.37 – 7.32 (m, 3H), 6.58 (d, *J* = 10.3 Hz, 2H), 6.08 (d, *J* = 10.2 Hz, 2H), 4.64 (d, *J* = 14.6 Hz, 1H), 4.43 (dd, *J* = 14.6, 2.2 Hz, 1H), 3.28 – 3.19 (m, 2H), 2.67 (dd, *J* = 16.0, 5.4 Hz, 1H), 1.53 (s, 3H) ppm; <sup>13</sup>C NMR (100 MHz, CDCl<sub>3</sub>) δ 196.7, 149.5, 148.2, 131.8, 130.3, 129.5, 128.6, 121.6, 106.7, 95.1, 84.0, 80.8, 70.6, 48.9, 36.1, 23.8 ppm; FTIR (neat) ν 2912, 1687, 1375, 1245, 1095, 903, 723 cm<sup>-1</sup>; HRMS (ESI) *m/z*: Calcd. For C<sub>18</sub>H<sub>15</sub>ClNaO<sub>2</sub><sup>+</sup>: 321.0653, Found: 321.0659 (M+Na<sup>+</sup>)

**b) Characterization data for compounds 3**

**(*E*)-3-(bromo(phenyl)methylene)-7a-methyl-2,3,3a,7a-tetrahydrobenzofuran-5(4*H*)-one, 3a**

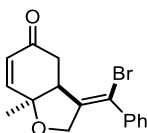

Light yellow semisolid, 58.3 mg, 91% yield, PE : EtOAc = 5:1.  $^1\text{H}$  NMR (400 MHz,  $\text{CDCl}_3$ )  $\delta$  7.36 – 7.26 (m, 5H), 6.56 (dd,  $J$  = 10.2, 0.7 Hz, 1H), 6.14 (d,  $J$  = 10.2 Hz, 1H), 4.32 (dd,  $J$  = 13.2, 1.7 Hz, 1H), 4.16 (d,  $J$  = 13.2 Hz, 1H), 3.31 – 3.25 (m, 2H), 2.71 (td,  $J$  = 8.4, 5.6 Hz, 1H), 1.54 (s, 3H) ppm;  $^{13}\text{C}$  NMR (400 MHz,  $\text{CDCl}_3$ )  $\delta$  197.4, 149.6, 142.1, 139.5, 130.3, 129.1, 128.5, 128.3, 116.7, 79.5, 69.8, 50.7, 36.5, 24.3 ppm; FTIR (neat)  $\nu$  3358, 2920, 1678, 1444, 1091, 1007, 854  $\text{cm}^{-1}$ ; HRMS (ESI)  $m/z$ : Calcd. For  $\text{C}_{16}\text{H}_{15}\text{BrO}_2^+$ : 341.0148, Found: 341.0158 ( $\text{M}+\text{Na}^+$ ).

**(*E*)-3-(bromo(*p*-tolyl)methylene)-7a-methyl-2,3,3a,7a-tetrahydrobenzofuran-5(4*H*)-one, 3b**

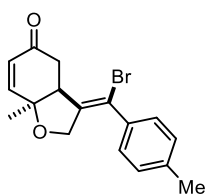

Off-white solide, 60.4 mg, 91% yield, PE : EtOAc = 5:1, M.p. 106 – 108 °C.  $^1\text{H}$  NMR (400 MHz,  $\text{CDCl}_3$ )  $\delta$  7.18 – 7.12 (m, 4H), 6.56 (d,  $J$  = 10.2 Hz, 1H), 6.13 (d,  $J$  = 10.2 Hz, 1H), 4.32 (dd,  $J$  = 13.2, 1.6 Hz, 1H), 4.16 (d,  $J$  = 13.2 Hz, 1H), 3.30 – 3.23 (m, 2H), 2.70 (dt,  $J$  = 14.6, 4.3 Hz, 1H), 2.34 (s, 3H), 1.53 (s, 3H) ppm;  $^{13}\text{C}$  NMR (100 MHz,  $\text{CDCl}_3$ )  $\delta$  197.4, 149.6, 141.5, 139.1, 136.6, 130.3, 129.1, 128.2, 116.9, 79.5, 69.8, 50.7, 36.4, 24.2, 21.3 ppm; FTIR (neat)  $\nu$  2923, 1696, 1406, 1370, 1279, 1069, 1026, 951, 865, 781  $\text{cm}^{-1}$ ; HRMS (ESI)  $m/z$ : Calcd. For  $\text{C}_{17}\text{H}_{18}\text{BrO}_2^+$ : 333.0485, Found: 333.0484 ( $\text{M}+\text{H}^+$ ).

**(*E*)-3-(bromo(4-fluorophenyl)methylene)-7a-methyl-2,3,3a,7a-tetrahydrobenzofuran-5(4*H*)-one, 3c**

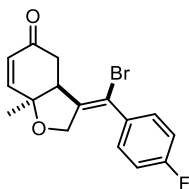

Light yellow liquid, 41.0 mg, 61% yield, PE : EtOAc = 5:1.  $^1\text{H}$  NMR (400 MHz,  $\text{CDCl}_3$ )  $\delta$  7.28 – 7.25 (m, 2H), 7.05 – 7.00 (m, 2H), 6.56 (d,  $J$  = 10.2 Hz, 1H), 6.14 (d,  $J$  = 10.2 Hz, 1H), 4.29 (dd,  $J$  = 13.2, 1.8 Hz, 1H), 4.13 (d,  $J$  = 13.2 Hz, 1H), 3.30 – 3.24 (m, 2H), 2.70 (dd,  $J$  = 16.0, 5.7 Hz, 1H), 1.54 (s, 3H) ppm;  $^{13}\text{C}$  NMR (100 MHz,  $\text{CDCl}_3$ )  $\delta$  197.3,

162.7 (d,  $J = 249.9$  Hz), 149.5, 142.5, 135.6 (d,  $J = 3.1$  Hz), 130.4, 130.3 (d,  $J = 8.5$  Hz), 115.6 (d,  $J = 21.9$  Hz), 79.7, 69.7, 50.7, 36.4, 24.2 ppm;  $^{19}\text{F}$  NMR (376 MHz,  $\text{CDCl}_3$ )  $\delta$  -111.2 ppm; FTIR (neat)  $\nu$  2972, 1680, 1504, 1228, 1088, 1012, 857, 720  $\text{cm}^{-1}$ ; HRMS (ESI)  $m/z$ : Calcd. For  $\text{C}_{16}\text{H}_{15}\text{BrFO}_2^+$ : 337.0234, Found: 337.0236 ( $\text{M}+\text{H}^+$ ).

**(*E*)-3-(bromo(4-chlorophenyl)methylene)-7a-methyl-2,3,3a,7a-tetrahydrobenzofuran-5(4*H*)-one, 3d**

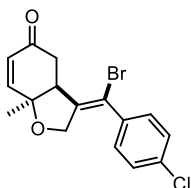

Off-white solid, 50.0 mg, 71% yield, PE : EtOAc = 5:1.  $^1\text{H}$  NMR (400 MHz,  $\text{CDCl}_3$ )  $\delta$  7.31 – 7.28 (m, 2H), 7.25 – 7.17 (m, 2H), 6.53 (dd,  $J = 10.2, 0.8$  Hz, 1H), 6.11 (d,  $J = 10.2$  Hz, 1H), 4.27 (dd,  $J = 13.2, 1.8$  Hz, 1H), 4.11 (d,  $J = 13.2$  Hz, 1H), 3.29 – 3.20 (m, 2H), 2.68 (dd,  $J = 15.9, 5.6$  Hz, 1H), 1.52 (s, 3H) ppm;  $^{13}\text{C}$  NMR (100 MHz,  $\text{CDCl}_3$ )  $\delta$  197.2, 149.5, 142.9, 137.9, 135.0, 130.4, 129.7, 128.8, 115.3, 79.7, 69.7, 50.8, 36.4, 24.2 ppm; FTIR (neat)  $\nu$  2968, 1690, 1486, 1279, 1070, 1030, 951, 865, 761  $\text{cm}^{-1}$ ; HRMS (ESI)  $m/z$ : Calcd. For  $\text{C}_{16}\text{H}_{14}\text{BrClO}_2\text{Na}^+$ : 374.9758, Found: 374.9770 ( $\text{M}+\text{Na}^+$ ).

**(*E*)-3-(bromo(4-bromophenyl)methylene)-7a-methyl-2,3,3a,7a-tetrahydrobenzofuran-5(4*H*)-one, 3e**

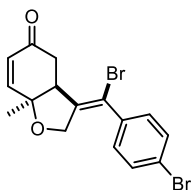

Light yellow solid, 62.9 mg, 79% yield, PE : EtOAc = 5:1, M.p. 129 – 131  $^{\circ}\text{C}$ .  $^1\text{H}$  NMR (400 MHz,  $\text{CDCl}_3$ )  $\delta$  7.48 – 7.45 (m, 2H), 7.17 – 7.13 (m, 2H), 6.55 (dd,  $J = 10.3, 0.7$  Hz), 6.13 (d,  $J = 10.3$  Hz, 1H), 4.29 (dd,  $J = 13.2, 1.8$  Hz, 1H), 4.13 (d,  $J = 13.2$  Hz, 1H), 3.30 – 3.23 (m, 2H), 2.70 (dd,  $J = 15.8, 5.5$  Hz, 1H), 1.54 (s, 3H) ppm;  $^{13}\text{C}$  NMR (100 MHz,  $\text{CDCl}_3$ )  $\delta$  197.1, 149.5, 142.9, 138.3, 131.7, 130.4, 129.9, 123.2, 115.3, 79.6, 69.7, 50.7, 36.3, 24.2 ppm; FTIR (neat)  $\nu$  2924, 1696, 1482, 1391, 1279, 1068, 1027, 951, 863, 759  $\text{cm}^{-1}$ ; HRMS (ESI)  $m/z$ : Calcd. For  $\text{C}_{16}\text{H}_{14}\text{Br}_2\text{O}_2\text{Na}^+$ : 418.9253, Found: 418.9256 ( $\text{M}+\text{Na}^+$ ).

**(E)-methyl 4-(bromo(7a-methyl-5-oxo-3a,4,5,7a-tetrahydrobenzofuran-3(2H)-ylidene)methyl)benzoate, 3f**

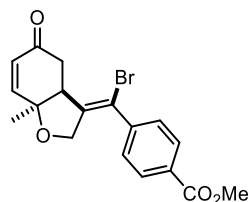

Off-white solid, 59.4 mg, 79% yield, PE : EtOAc = 5:1, M.p. 103 – 105 °C. <sup>1</sup>H NMR (400 MHz, CDCl<sub>3</sub>) δ 8.02 – 7.99 (m, 2H), 7.37 – 7.35 (m, 2H), 6.57 (d, *J* = 10.3 Hz, 1H), 6.15 (d, *J* = 10.3 Hz, 1H), 4.33 (dd, *J* = 13.3, 1.7 Hz, 1H), 4.14 (d, *J* = 13.3 Hz, 1H), 3.92 (s, 3H), 3.31 – 3.27 (m, 2H), 2.75 – 2.69 (m, 1H), 1.55 (s, 3H) ppm; <sup>13</sup>C NMR (100 MHz, CDCl<sub>3</sub>) δ 197.1, 166.4, 149.5, 143.7, 143.6, 130.5, 130.4, 129.8, 128.4, 115.4, 79.6, 69.7, 52.4, 50.9, 36.3, 24.2 ppm; FTIR (neat) ν 2850, 1720, 1671, 1434, 1279, 1110, 1015, 965, 841, 764 cm<sup>-1</sup>; HRMS (ESI) *m/z*: Calcd. For C<sub>18</sub>H<sub>18</sub>BrO<sub>4</sub><sup>+</sup>: 377.0383, Found: 377.0390 (M+H<sup>+</sup>).

**(E)-3-(bromo(4-nitrophenyl)methylene)-7a-methyl-2,3,3a,7a-tetrahydrobenzofuran-5(4H)-one, 3g**

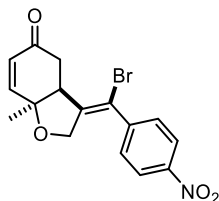

Off-white solid, 52.3 mg, 72% yield, PE : EtOAc = 5:1, M.p. 178 – 180 °C. <sup>1</sup>H NMR (400 MHz, CDCl<sub>3</sub>) δ 8.23 – 8.19 (m, 2H), 7.48 – 7.46 (m, 2H), 6.58 (dd, *J* = 10.2, 0.5 Hz, 1H), 6.16 (d, *J* = 10.2 Hz, 1H), 4.33 (dd, *J* = 13.3, 1.7 Hz, 1H), 4.14 (d, *J* = 13.3 Hz, 1H), 3.33 – 3.27 (m, 2H), 2.73 (dd, *J* = 18.4, 8.1 Hz, 1H), 1.57 (s, 3H) ppm; <sup>13</sup>C NMR (100 MHz, CDCl<sub>3</sub>) δ 196.8, 149.4, 147.7, 145.41, 145.37, 130.5, 129.4, 123.8, 113.7, 79.8, 69.6, 51.0, 36.3, 24.1 ppm; FTIR (neat) ν 2962, 1678, 1591, 1506, 1343, 1259, 1088, 1010, 840, 798, 753 cm<sup>-1</sup>; HRMS (ESI) *m/z*: Calcd. For C<sub>16</sub>H<sub>15</sub>BrNO<sub>4</sub><sup>+</sup>: 364.0179, Found: 364.0170 (M+H<sup>+</sup>).

**(E)-3-(bromo(3-chlorophenyl)methylene)-7a-methyl-2,3,3a,7a-tetrahydrobenzofuran-5(4H)-one, 3h**

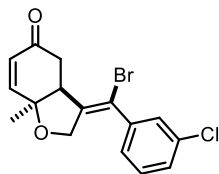

Off-white solid, 46.6 mg, 66% yield, PE : EtOAc = 5:1, M.p. 123 – 125 °C. <sup>1</sup>H NMR (400 MHz, CDCl<sub>3</sub>) δ 7.29 – 7.27 (m, 3H), 7.16 – 7.13 (m, 1H), 6.56 (d, *J* = 10.3 Hz, 1H), 6.14 (d, *J* = 10.3 Hz, 1H), 4.31 (d, *J* = 13.3 Hz, 1H), 4.15 (d, *J* = 13.3 Hz, 1H), 3.30 – 3.23 (m, 2H), 2.74 – 2.67 (m, 1H), 1.54 (s, 3H) ppm; <sup>13</sup>C NMR (100 MHz, CDCl<sub>3</sub>) δ 197.1, 149.5, 143.5, 141.1, 134.4, 130.4, 129.8, 129.2, 128.5, 126.5, 114.8, 79.64, 69.7, 50.8, 36.3, 24.2 ppm; FTIR (neat) ν 3055, 2978, 1681, 1564, 1412, 1265, 1091, 897 cm<sup>-1</sup>; HRMS (ESI) *m/z*: Calcd. For C<sub>16</sub>H<sub>14</sub>BrClNO<sub>2</sub>Na<sup>+</sup>: 374.9758, Found: 374.9766 (M+Na<sup>+</sup>).

**(*E*)-3-(bromo(thiophen-3-yl)methylene)-7a-methyl-2,3,3a,7a-tetrahydrobenzo furan-5(4*H*)-one, 3i**

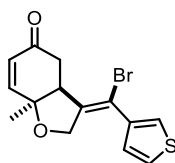

Reddish brown semi-solid, 44.4 mg, 64% yield, PE : EtOAc = 5:1. <sup>1</sup>H NMR (400 MHz, CDCl<sub>3</sub>) δ 7.31 (dd, *J* = 5.1, 3.0 Hz, 1H), 7.22 (dd, *J* = 3.0, 1.3 Hz, 1H), 7.10 (dd, *J* = 5.1, 1.3 Hz, 1H), 6.58 (dd, *J* = 10.2, 0.6 Hz, 1H), 6.12 (d, *J* = 10.2 Hz, 1H), 4.43 (dd, *J* = 13.3, 1.8 Hz, 1H), 4.37 (d, *J* = 13.3 Hz, 1H), 3.27 (td, *J* = 5.9, 1.0 Hz, 1H), 3.19 (dd, *J* = 16.5, 5.9 Hz, 1H), 2.72 (dd, *J* = 16.5, 6.2 Hz, 1H), 1.52 (s, 3H) ppm; <sup>13</sup>C NMR (100 MHz, CDCl<sub>3</sub>) δ 197.4, 149.4, 141.7, 139.8, 130.3, 127.7, 125.9, 125.0, 111.3, 79.2, 70.0, 51.1, 36.5, 24.3 ppm; FTIR (neat) ν 3355, 2969, 1675, 1410, 1371, 1137, 1069, 1020, 953, 885, 837, 800, 751 cm<sup>-1</sup>; HRMS (ESI) *m/z*: Calcd. For C<sub>14</sub>H<sub>13</sub>BrNaO<sub>2</sub>S<sup>+</sup>: 346.9712, Found: 346.9723 (M+Na<sup>+</sup>).

**(*E*)-3-(bromo(phenyl)methylene)-7a-ethyl-2,3,3a,7a-tetrahydrobenzofuran-5(4*H*)-one, 3j**

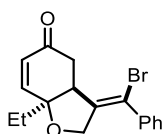

Off-white solid, 50.3 mg, 76% yield, PE : EtOAc = 5:1, M.p. 75 – 76 °C. <sup>1</sup>H NMR (400 MHz, CDCl<sub>3</sub>) δ 7.34 – 7.26 (m, 5H), 6.58 (dd, *J* = 10.4, 0.6 Hz, 1H), 6.20 (d, *J* = 10.4 Hz, 1H), 4.32 (dd, *J* = 13.1, 1.9 Hz, 1H), 4.14 (d, *J* = 13.1 Hz, 1H), 3.34 – 3.31 (m, 1H), 3.24 (dd, *J* = 16.8, 5.0 Hz, 1H), 2.71 (dd, *J* = 16.8, 6.7 Hz, 1H), 1.85 (q, *J* = 7.6 Hz, 2H), 1.03 (t, *J* = 7.6 Hz, 3H) ppm; <sup>13</sup>C NMR (100 MHz, CDCl<sub>3</sub>) δ 197.6, 148.6, 142.6, 139.4, 131.2, 129.0, 128.5, 128.4, 116.6, 82.0, 69.5, 48.5, 37.0, 30.9, 8.3 ppm; FTIR (neat) ν 3355, 2965, 1681, 1444, 1385, 1079, 1015, 867, 760 cm<sup>-1</sup>; HRMS (ESI) *m/z*: Calcd. For C<sub>17</sub>H<sub>17</sub>BrNaO<sub>2</sub><sup>+</sup>: 355.0304, Found: 355.0314 (M+Na<sup>+</sup>).

**(*E*)-3-(bromo(phenyl)methylene)-7a-isopropyl-2,3,3a,7a-tetrahydrobenzofuran-5(4*H*)-one, 3k**

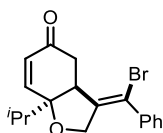

Off-white solid, 46.5 mg, 67% yield, PE : EtOAc = 5:1, M.p. 75 – 76 °C. <sup>1</sup>H NMR (400 MHz, CDCl<sub>3</sub>) δ 7.34 – 7.26 (m, 5H), 6.58 (d, *J* = 10.4 Hz, 2H), 6.27 (d, *J* = 10.4 Hz, 2H), 4.27 (dd, *J* = 12.9, 1.8 Hz, 1H), 4.12 (d, *J* = 12.9 Hz, 1H), 3.40 – 3.38 (m, 1H), 3.22 (dd, *J* = 17.1, 4.2 Hz, 1H), 2.70 (dd, *J* = 17.1, 7.2 Hz, 1H), 2.09 – 2.04 (m, 1H), 1.06 (d, *J* = 7.0 Hz, 3H), 1.03 (d, *J* = 6.9 Hz, 3H) ppm; <sup>13</sup>C NMR (100 MHz, CDCl<sub>3</sub>) δ 197.9, 147.4, 143.2, 139.3, 132.0, 129.0, 128.5, 116.7, 84.2, 69.1, 46.6, 38.0, 35.6, 17.5, 17.2 ppm; FTIR (neat) ν 2965, 1676, 1445, 1387, 1119, 1058, 866, 785 cm<sup>-1</sup>; HRMS (ESI) *m/z*: Calcd. For C<sub>18</sub>H<sub>20</sub>BrO<sub>2</sub><sup>+</sup>: 347.0641, Found: 347.0640 (M+H<sup>+</sup>).

**(*E*)-7a-benzyl-3-(bromo(phenyl)methylene)-2,3,3a,7a-tetrahydrobenzofuran-5(4*H*)-one, 3l**

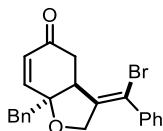

Light yellow liquid, 49.8 mg, 63% yield, PE : EtOAc = 5:1. <sup>1</sup>H NMR (400 MHz, CDCl<sub>3</sub>) δ 7.33 – 7.22 (m, 10H), 6.55 (d, *J* = 10.4 Hz, 1H), 6.14 (d, *J* = 10.3 Hz, 1H), 4.32 (dd, *J* = 13.1, 1.9 Hz, 1H), 4.16 (d, *J* = 13.1 Hz, 1H), 3.41 – 3.38 (m, 1H), 3.16 – 3.11 (m, 2H), 3.05 (d, *J* = 13.6 Hz, 1H), 2.31 (dd, *J* = 16.8, 6.7 Hz, 1H) ppm; <sup>13</sup>C NMR (100

MHz, CDCl<sub>3</sub>)  $\delta$  197.4, 148.2, 142.0, 139.3, 135.2, 131.1, 130.4, 129.0, 128.6, 128.5, 128.4, 127.3, 116.7, 82.0, 69.7, 48.9, 44.7, 36.6 ppm; FTIR (neat)  $\nu$  2920, 1682, 1492, 1443, 1170, 1042, 1014, 848, 759 cm<sup>-1</sup>; HRMS (ESI) m/z: Calcd. For C<sub>22</sub>H<sub>19</sub>BrNaO<sub>2</sub><sup>+</sup>: 417.0461, Found: 417.0468 (M+Na<sup>+</sup>).

**(E)-3-(bromo(phenyl)methylene)-7a-phenyl-2,3,3a,7a-tetrahydrobenzofuran-5(4H)-one, 3m**

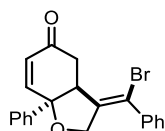

Off-white semi-solid, 38.8 mg, 51% yield, PE : EtOAc = 5:1. <sup>1</sup>H NMR (400 MHz, CDCl<sub>3</sub>)  $\delta$  7.49 – 7.46 (m, 2H), 7.44 – 7.40 (m, 2H), 7.38 – 7.30 (m, 4H), 7.28 – 7.25 (m, 2H), 6.62 (d, *J* = 10.2 Hz, 1H), 6.32 (d, *J* = 10.2 Hz, 1H), 4.50 (dd, *J* = 13.2, 2.0 Hz, 1H), 4.35 (d, *J* = 13.2 Hz, 1H), 3.58 – 3.55 (m, 1H), 3.32 (dd, *J* = 16.7, 5.2 Hz, 1H), 2.84 (dd, *J* = 16.8, 6.4 Hz, 1H) ppm; <sup>13</sup>C NMR (100 MHz, CDCl<sub>3</sub>)  $\delta$  197.4, 147.9, 141.6, 141.0, 139.3, 130.8, 129.1, 129.0, 128.5, 128.4, 125.3, 116.6, 83.2, 70.1, 52.4, 36.3 ppm; FTIR (neat)  $\nu$  2918, 2850, 1686, 1445, 1261, 1019, 797, 762 cm<sup>-1</sup>; HRMS (ESI) m/z: Calcd. For C<sub>21</sub>H<sub>18</sub>BrO<sub>2</sub><sup>+</sup>: 381.0485, Found: 381.0493 (M+H<sup>+</sup>).

**(E)-3-(1-bromoethylidene)-7a-methyl-2,3,3a,7a-tetrahydrobenzofuran-5(4H)-one, 3n**

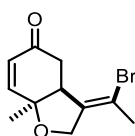

Light yellow liquid, 40.0 mg, 78% yield, PE : EtOAc = 5:1. <sup>1</sup>H NMR (400 MHz, CDCl<sub>3</sub>)  $\delta$  6.56 (d, *J* = 10.2 Hz, 1H), 6.05 (d, *J* = 10.2 Hz, 1H), 4.42 (d, *J* = 12.8 Hz, 1H), 4.28 (d, *J* = 12.8 Hz, 1H), 3.08 – 3.02 (m, 2H), 2.64 (dd, *J* = 18.8, 8.3 Hz, 1H), 2.19 (s, 3H), 1.47 (s, 3H) ppm; <sup>13</sup>C NMR (100 MHz, CDCl<sub>3</sub>)  $\delta$  197.7, 149.1, 139.1, 130.1, 113.3, 79.6, 69.0, 49.9, 36.7, 26.3, 24.2 ppm; FTIR (neat)  $\nu$  2944, 2830, 1450, 1374, 1275, 1167, 1022, 824 cm<sup>-1</sup>; HRMS (ESI) m/z: Calcd. For C<sub>11</sub>H<sub>14</sub>BrO<sub>2</sub><sup>+</sup>: 257.0172, Found: 257.0178 (M+H<sup>+</sup>).

### c) Characterization data for compounds 4

#### **(*E*)-3-(iodo(phenyl)methylene)-7a-methyl-2,3,3a,7a-tetrahydrobenzofuran-5(4*H*)-one, 4a**

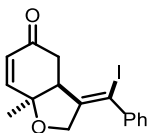

Light yellow solid, 66.6 mg, 91% yield, PE : EtOAc = 5:1, M.p. 72 – 74 °C. <sup>1</sup>H NMR (400 MHz, CDCl<sub>3</sub>) δ 7.33 – 7.22 (m, 5H), 6.58 (d, *J* = 10.2 Hz, 1H), 6.12 (d, *J* = 10.2 Hz, 1H), 4.37 (dd, *J* = 13.5, 1.5 Hz, 1H), 4.17 (d, *J* = 13.4 Hz, 1H), 3.16 – 3.10 (m, 2H), 2.73 (dd, *J* = 18.9, 8.7 Hz, 1H), 1.52 (s, 3H) ppm; <sup>13</sup>C NMR (100 MHz, CDCl<sub>3</sub>) δ 197.3, 149.3, 148.5, 142.8, 130.2, 128.7, 128.6, 128.2, 92.0, 78.9, 69.3, 53.6, 36.8, 24.6 ppm; FTIR (neat) ν 2924, 1679, 1443, 1370, 1279, 1070, 1024, 952, 852, 722 cm<sup>-1</sup>; HRMS (ESI) *m/z*: Calcd. For C<sub>16</sub>H<sub>16</sub>IO<sub>2</sub><sup>+</sup>: 367.0189, Found: 367.0199 (M+H<sup>+</sup>).

#### **(*E*)-3-(iodo(*p*-tolyl)methylene)-7a-methyl-2,3,3a,7a-tetrahydrobenzofuran-5(4*H*)-one, 4b**

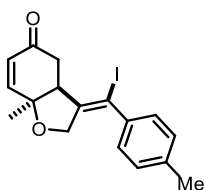

Off-white solid, 69.2 mg, 91% yield, PE : EtOAc = 5:1, M.p. 150 – 152. <sup>1</sup>H NMR (400 MHz, CDCl<sub>3</sub>) δ 7.14 – 7.11 (m, 4H), 6.57 (d, *J* = 10.2 Hz, 1H), 6.12 (d, *J* = 10.2 Hz, 1H), 4.37 (dd, *J* = 13.4, 1.6 Hz, 1H), 4.17 (d, *J* = 13.4 Hz, 1H), 3.15 – 3.09 (m, 2H), 2.72 (dd, *J* = 18.4, 8.3 Hz, 1H), 2.33 (s, 3H), 1.51 (s, 3H) ppm; <sup>13</sup>C NMR (100 MHz, CDCl<sub>3</sub>) δ 197.3, 149.3, 147.9, 139.9, 138.7, 130.1, 129.2, 128.1, 92.4, 78.8, 69.3, 53.6, 36.8, 24.6, 21.3 ppm; FTIR (neat) ν 2922, 1685, 1370, 1278, 1069, 1022, 952, 857, 777 cm<sup>-1</sup>; HRMS (ESI) *m/z*: Calcd. For C<sub>17</sub>H<sub>18</sub>IO<sub>2</sub><sup>+</sup>: 381.0346, Found: 381.0346 (M+H<sup>+</sup>).

#### **(*E*)-3-((4-fluorophenyl)iodomethylene)-7a-methyl-2,3,3a,7a-tetrahydrobenzofuran-5(4*H*)-one, 4c**



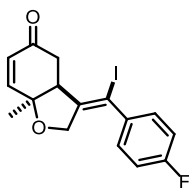

Light yellow solid, 49.2 mg, 64% yield, PE : EtOAc = 5:1, M.p. 118 – 120 °C. <sup>1</sup>H NMR (400 MHz, CDCl<sub>3</sub>) δ 7.24 – 7.20 (m, 2H), 7.02 – 6.98 (m, 2H), 6.57 (d, *J* = 10.2 Hz, 1H), 6.12 (d, *J* = 10.2 Hz, 1H), 4.34 (dd, *J* = 13.4, 1.7 Hz, 1H), 4.15 (d, *J* = 13.4 Hz, 1H), 3.16 – 3.12 (m, 2H), 2.71 (dd, *J* = 18.3, 8.2 Hz, 1H), 1.52 (s, 3H) ppm; <sup>13</sup>C NMR (100 MHz, CDCl<sub>3</sub>) δ 197.1, 162.4 (d, *J* = 249.2 Hz), 149.2, 149.0, 138.9 (d, *J* = 3.1 Hz), 130.1 (d, *J* = 14.4 Hz), 130.0, 115.6 (d, *J* = 21.7 Hz), 90.5, 79.0, 69.2, 53.6, 36.7, 24.5 ppm; <sup>19</sup>F NMR (376 MHz, CDCl<sub>3</sub>) δ -111.8 ppm; FTIR (neat) ν 2926, 1687, 1504, 1372, 1278, 1229, 1070, 1028, 952, 862, 735 cm<sup>-1</sup>; HRMS (ESI) *m/z*: Calcd. For C<sub>16</sub>H<sub>15</sub>INO<sub>4</sub><sup>+</sup>: 406.9915, Found: 406.9924 (M+Na<sup>+</sup>).

**(*E*)-3-((4-chlorophenyl)iodomethylene)-7a-methyl-2,3,3a,7a-tetrahydrobenzo-furan-5(4*H*)-one, 4d**

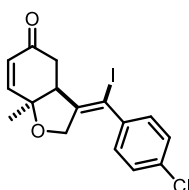

Off-white solid, 58.4 mg, 73% yield, PE : EtOAc = 5:1, M.p. 172 – 174 °C. <sup>1</sup>H NMR (400 MHz, CDCl<sub>3</sub>) δ 7.28 – 7.25 (m, 2H), 7.16 – 7.13 (m, 2H), 6.55 (d, *J* = 10.2 Hz, 1H), 6.10 (d, *J* = 10.2 Hz, 1H), 4.31 (dd, *J* = 13.5, 1.6 Hz, 1H), 4.13 (d, *J* = 13.5 Hz, 1H), 3.14 – 3.08 (m, 2H), 2.69 (dd, *J* = 18.3, 8.2 Hz, 1H), 1.49 (s, 3H) ppm; <sup>13</sup>C NMR (100 MHz, CDCl<sub>3</sub>) δ 197.1, 149.3, 149.2, 141.2, 134.5, 130.2, 129.5, 128.8, 90.2, 79.0, 69.2, 53.6, 36.7, 24.5 ppm; FTIR (neat) ν 2924, 1689, 1484, 1370, 1279, 1209, 1070, 1025, 952, 893, 854, 821, 744 cm<sup>-1</sup>; HRMS (ESI) *m/z*: Calcd. For C<sub>16</sub>H<sub>14</sub>ClINaO<sub>2</sub><sup>+</sup>: 422.9619, Found: 422.9620 (M+Na<sup>+</sup>).

**(*E*)-3-((4-bromophenyl)iodomethylene)-7a-methyl-2,3,3a,7a-tetrahydrobenzo-furan-5(4*H*)-one, 4e**

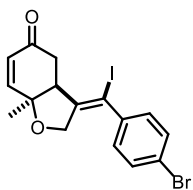

Light yellow solid, 59.6 mg, 67% yield, PE : EtOAc = 5:1, M.p. 174 – 176 °C.  $^1\text{H}$  NMR (400 MHz,  $\text{CDCl}_3$ )  $\delta$  7.46 – 7.43 (m, 2H), 7.12 – 7.09 (m, 2H), 6.57 (d,  $J$  = 10.2 Hz, 1H), 6.12 (d,  $J$  = 10.2 Hz, 1H), 4.33 (dd,  $J$  = 13.5, 1.6 Hz, 1H), 4.15 (d,  $J$  = 13.5 Hz, 1H), 3.16 – 3.10 (m, 2H), 2.71 (dd,  $J$  = 18.4, 8.3 Hz, 1H), 1.52 (s, 3H) ppm;  $^{13}\text{C}$  NMR (100 MHz,  $\text{CDCl}_3$ )  $\delta$  197.1, 149.3, 149.2, 141.7, 131.7, 130.2, 129.8, 122.8, 90.2, 79.0, 69.2, 53.6, 36.7, 24.5 ppm; FTIR (neat)  $\nu$  2922, 1686, 1481, 1390, 1330, 1278, 1052, 1023, 952, 892, 852, 818  $\text{cm}^{-1}$ ; HRMS (ESI)  $m/z$ : Calcd. For  $\text{C}_{16}\text{H}_{15}\text{BrIO}_2^+$ : 444.9295, Found: 444.9304 ( $\text{M}+\text{H}^+$ ).

**(*E*)-Methyl 4-(iodo(7a-methyl-5-oxo-3a,4,5,7a-tetrahydrobenzofuran-3(2H)-ylidene)methyl)benzoate, 4f**

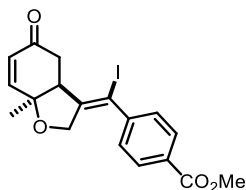

Off-white solid, 61.1 mg, 72% yield, PE : EtOAc = 5:1, M.p. 129 – 131 °C.  $^1\text{H}$  NMR (400 MHz,  $\text{CDCl}_3$ )  $\delta$  7.98 (d,  $J$  = 8.4 Hz, 2H), 7.30 (d,  $J$  = 8.4 Hz, 2H), 6.58 (d,  $J$  = 10.2 Hz, 1H), 6.13 (d,  $J$  = 10.2 Hz, 1H), 4.36 (dd,  $J$  = 13.5, 1.6 Hz, 1H), 4.14 (d,  $J$  = 13.5 Hz, 1H), 3.92 (s, 3H), 3.16 – 3.13 (m, 2H), 2.73 (dd,  $J$  = 18.3, 8.3 Hz, 1H), 1.53 (s, 3H) ppm;  $^{13}\text{C}$  NMR (100 MHz,  $\text{CDCl}_3$ )  $\delta$  196.9, 166.3, 149.8, 149.1, 146.9, 130.2, 130.2, 129.8, 128.2, 90.1, 79.0, 69.2, 53.6, 52.34, 36.6, 24.5 ppm; FTIR (neat)  $\nu$  2927, 1723, 1682, 1434, 1278, 1109, 1017, 955, 857, 729  $\text{cm}^{-1}$ ; HRMS (ESI)  $m/z$ : Calcd. For  $\text{C}_{18}\text{H}_{17}\text{INO}_4^+$ : 447.0064, Found: 447.0076 ( $\text{M}+\text{Na}^+$ ).

**(*E*)-3-(iodo(4-nitrophenyl)methylene)-7a-methyl-2,3,3a,7a-tetrahydrobenzofuran-5(4H)-one, 4g**

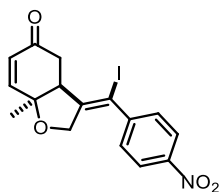

Light yellow solid, 60.0 mg, 73% yield, PE : EtOAc = 5:1, M.p. 163 – 165 °C. <sup>1</sup>H NMR (400 MHz, CDCl<sub>3</sub>) δ 8.21 – 8.18 (m, 2H), 7.43 – 7.40 (m, 2H), 6.58 (d, *J* = 10.3 Hz, 1H), 6.15 (d, *J* = 10.3 Hz, 1H), 4.35 (dd, *J* = 13.6, 1.7 Hz, 1H), 4.14 (d, *J* = 13.6 Hz, 1H), 3.19 – 3.14 (m, 2H), 2.73 (dd, *J* = 18.2, 8.1 Hz, 1H), 1.55 (s, 3H) ppm; <sup>13</sup>C NMR (100 MHz, CDCl<sub>3</sub>) δ 196.7, 151.2, 149.1, 148.8, 147.5, 130.3, 129.3, 123.9, 88.1, 79.2, 69.2, 53.6, 36.5, 24.4 ppm; FTIR (neat) ν 2921, 1686, 1510, 1342, 1276, 1110, 1027, 830, 729 cm<sup>-1</sup>; HRMS (ESI) *m/z*: Calcd. For C<sub>16</sub>H<sub>15</sub>INO<sub>4</sub><sup>+</sup>: 412.0040, Found: 412.0051 (M+H<sup>+</sup>).

**(*E*)-3-((3-chlorophenyl)iodomethylene)-7a-methyl-2,3,3a,7a-tetrahydrobenzofuran-5(4*H*)-one, 4h**

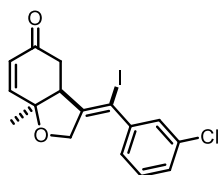

Light yellow semi-solid, 51.2 mg, 64% yield, PE : EtOAc = 5:1. <sup>1</sup>H NMR (400 MHz, CDCl<sub>3</sub>) δ 7.26 – 7.22 (m, 3H), 7.12 – 7.09 (m, 1H), 6.58 (d, *J* = 10.2 Hz, 1H), 6.13 (d, *J* = 10.2 Hz, 1H), 4.35 (dd, *J* = 13.6, 1.6 Hz, 1H), 4.17 (d, *J* = 13.6 Hz, 1H), 3.15 – 3.09 (m, 2H), 2.72 (dd, *J* = 18.4, 8.3 Hz, 1H), 1.52 (s, 3H) ppm; <sup>13</sup>C NMR (100 MHz, CDCl<sub>3</sub>) δ 197.0, 149.7, 149.1, 144.3, 134.3, 130.2, 129.9, 128.8, 128.2, 126.3, 89.4, 79.0, 69.2, 53.6, 36.6, 24.5 ppm; FTIR (neat) ν 2971, 1679, 1562, 1408, 1278, 1174, 1115, 1040, 907, 727 cm<sup>-1</sup>; HRMS (ESI) *m/z*: Calcd. For C<sub>16</sub>H<sub>15</sub>ClIO<sub>2</sub><sup>+</sup>: 400.9800, Found: 400.9808 (M+H<sup>+</sup>).

**(*E*)-7a-ethyl-3-(iodo(phenyl)methylene)-2,3,3a,7a-tetrahydrobenzofuran-5(4*H*)-one, 4i**

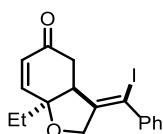

Light yellow liquid, 56.2 mg, 74% yield, PE : EtOAc = 5:1.  $^1\text{H}$  NMR (400 MHz,  $\text{CDCl}_3$ )  $\delta$  7.33 – 7.22 (m, 5H), 6.59 (d,  $J$  = 10.3 Hz, 1H), 6.19 (d,  $J$  = 10.3 Hz, 1H), 4.37 (dd,  $J$  = 13.4, 1.7 Hz, 1H), 4.14 (d,  $J$  = 13.3 Hz, 1H), 3.21 (td,  $J$  = 6.5, 1.4 Hz, 1H), 3.08 (dd,  $J$  = 16.6, 6.4 Hz, 1H), 2.73 (dd,  $J$  = 16.6, 6.7 Hz, 1H), 1.82 (q,  $J$  = 7.5 Hz, 2H), 1.02 (t,  $J$  = 7.6 Hz, 3H) ppm;  $^{13}\text{C}$  NMR (100 MHz,  $\text{CDCl}_3$ )  $\delta$  197.5, 148.9, 148.2, 142.7, 131.1, 128.7, 128.5, 128.2, 92.1, 81.4, 68.9, 51.5, 37.3, 31.0, 8.4 ppm; FTIR (neat)  $\nu$  2927, 1681, 1442, 1384, 1173, 1033, 932, 857, 757  $\text{cm}^{-1}$ ; HRMS (ESI)  $m/z$ : Calcd. For  $\text{C}_{17}\text{H}_{18}\text{IO}_2^+$ : 381.0346, Found: 381.0356 ( $\text{M}+\text{H}^+$ ).

**(*E*)-3-(iodo(phenyl)methylene)-7a-isopropyl-2,3,3a,7a-tetrahydrobenzofuran-5(4H)-one, 4j**

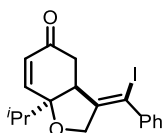

Off-white solid, 29.9 mg, 38% yield, PE : EtOAc = 5:1, 87 – 89 °C.  $^1\text{H}$  NMR (400 MHz,  $\text{CDCl}_3$ )  $\delta$  7.33 – 7.21 (m, 5H), 6.59 (d,  $J$  = 10.4 Hz, 1H), 6.25 (d,  $J$  = 10.4 Hz, 1H), 4.31 (dd,  $J$  = 13.1, 1.7 Hz, 1H), 4.12 (d,  $J$  = 13.1 Hz, 1H), 3.29 – 3.26 (m, 1H), 3.08 (dd,  $J$  = 16.9, 5.4 Hz, 1H), 2.72 (dd,  $J$  = 16.9, 7.2 Hz, 1H), 2.06 (hept,  $J$  = 6.9 Hz, 1H), 1.03 (dd,  $J$  = 15.9, 6.9 Hz, 6H) ppm;  $^{13}\text{C}$  NMR (100 MHz,  $\text{CDCl}_3$ )  $\delta$  197.7, 149.4, 147.0, 142.6, 131.8, 128.7, 128.5, 128.4, 92.5, 83.7, 68.6, 49.8, 38.4, 35.5, 17.32, 17.26 ppm; FTIR (neat)  $\nu$  2962, 1676, 1386, 1274, 1116, 1017, 857, 760  $\text{cm}^{-1}$ ; HRMS (ESI)  $m/z$ : Calcd. For  $\text{C}_{18}\text{H}_{19}\text{INaO}_2^+$ : 417.0322, Found: 417.0332 ( $\text{M}+\text{Na}^+$ ).

**(*E*)-7a-benzyl-3-(iodo(phenyl)methylene)-2,3,3a,7a-tetrahydrobenzofuran-5(4H)-one, 4k**

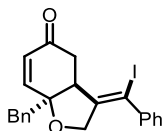

Light yellow semi-solid, 34.3 mg, 39% yield, PE : EtOAc = 5:1.  $^1\text{H}$  NMR (400 MHz,  $\text{CDCl}_3$ )  $\delta$  7.32 – 7.24 (m, 8H), 7.18 – 7.16 (m, 2H), 6.59 (d,  $J$  = 10.3 Hz, 1H), 6.12 (d,  $J$  = 10.3 Hz, 1H), 4.39 (dd,  $J$  = 13.4, 1.7 Hz, 1H), 4.18 (d,  $J$  = 13.4 Hz, 1H), 3.31 (td,  $J$  = 6.6, 1.4 Hz, 1H), 3.12 (d,  $J$  = 13.7 Hz, 1H), 3.03 (d,  $J$  = 13.7 Hz, 1H), 2.97 (dd,  $J$  =

16.6, 6.7 Hz, 1H), 2.42 (dd,  $J = 16.6, 6.6$  Hz, 1H) ppm;  $^{13}\text{C}$  NMR (100 MHz,  $\text{CDCl}_3$ )  $\delta$  197.4, 148.3, 148.0, 142.6, 135.2, 130.9, 130.5, 128.7, 128.5, 128.2, 127.4, 92.2, 81.4, 69.2, 51.8, 45.0, 36.9 ppm; FTIR (neat)  $\nu$  2915, 1681, 1492, 1386, 1265, 1043, 810  $\text{cm}^{-1}$ ; HRMS (ESI)  $m/z$ : Calcd. For  $\text{C}_{22}\text{H}_{20}\text{IO}_2^+$ : 443.0502, Found: 443.0512 ( $\text{M}+\text{H}^+$ ).

**3-(1-iodoethylidene)-7a-methyl-2,3,3a,7a-tetrahydrobenzofuran-5(4H)-one, (E)-4I and (Z)- 4I**

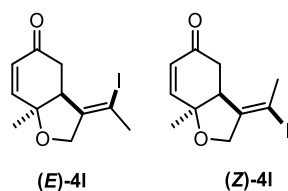

Following the general procedure, **4I** was isolated by silica gel flash chromatography (petroleum ether/ethyl acetate = 5:1) as a *E/Z* mixture ( $E/Z = 3/1$ ), Light yellow liquid, 38 mg, 63% yield.  $^1\text{H}$  NMR (400 MHz,  $\text{CDCl}_3$ )  $\delta$  6.59 (d,  $J = 10.2$  Hz, 1H), 6.59 (d,  $J = 10.2$  Hz, 0.32H), 6.05 (d,  $J = 10.2$  Hz, 1H), 6.04 (d,  $J = 10.2$  Hz, 0.32H), 4.51 (d,  $J = 13.1$  Hz, 1H), 4.45 – 4.41 (m, 1H), 4.28 (dd,  $J = 13.9, 1.3$  Hz, 0.35H), 4.25 – 4.21 (m, 0.33H), 3.13 – 3.09 (m, 0.35H), 2.97 – 2.94 (m, 1H), 2.84 (dd,  $J = 16.2, 8.4$  Hz, 1H), 2.76 – 2.71 (m, 0.31H), 2.68 (dd,  $J = 16.2, 6.0$  Hz, 1H), 2.58 – 2.54 (m, 0.33H), 2.54 – 2.53 (m, 1H), 2.40 (d,  $J = 1.3$  Hz, 3H), 1.44 (s, 4H) ppm;  $^{13}\text{C}$  NMR (100 MHz,  $\text{CDCl}_3$ )  $\delta$  197.6, (197.2), (149.5), 148.6, 145.5, (145.2), 130.0, (129.7), (88.8), 87.9, (81.2), 78.7, (77.0), 68.3, 53.2, (48.0), (38.2), 37.0, 30.7, (30.0), 24.6, (24.3) ppm; FTIR (neat)  $\nu$  2923, 1677, 1449, 1372, 1284, 1182, 1089, 805  $\text{cm}^{-1}$ ; HRMS (ESI)  $m/z$ : Calcd. For  $\text{C}_{11}\text{H}_{14}\text{IO}_2^+$ : 305.0033, Found: 305.0042 ( $\text{M}+\text{H}^+$ ).

**d) Characterization data for compounds 5**

**(E)-(7a-methyl-5-oxo-3a,4,5,7a-tetrahydrobenzofuran-3(2H)-ylidene)(phenyl) methyl acetate, 5a**

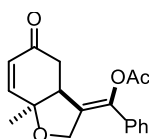

Yellow-brown liquid, 54.8 mg, 92% yield, PE : EtOAc = 2:1.  $^1\text{H}$  NMR (400 MHz,  $\text{CDCl}_3$ )  $\delta$  7.37 – 7.30 (m, 3H), 7.22 – 7.19 (m, 2H), 6.58 (dd,  $J = 10.2, 1.1$  Hz, 1H),

6.08 (d,  $J = 10.3$  Hz, 1H), 4.49 (s, 2H), 3.20 (t,  $J = 4.8$  Hz, 1H), 2.88 (dd,  $J = 16.6, 4.8$  Hz, 1H), 2.64 (dd,  $J = 16.6, 6.0$  Hz, 1H), 2.26 (s, 3H), 1.51 (s, 3H) ppm;  $^{13}\text{C}$  NMR (100 MHz,  $\text{CDCl}_3$ )  $\delta$  197.0, 168.7, 150.2, 140.7, 135.0, 130.1, 130.0, 128.8, 128.6, 126.7, 79.7, 68.2, 47.1, 37.0, 23.6, 20.9 ppm; FTIR (neat)  $\nu$  2970, 1758, 1446, 1372, 1197, 1027, 891, 773  $\text{cm}^{-1}$ ; HRMS (ESI)  $m/z$ : Calcd. For  $\text{C}_{18}\text{H}_{18}\text{O}_4\text{Na}^+$ : 321.1097, Found: 321.1105 ( $\text{M}+\text{Na}^+$ ).

**((E)-7a-methyl-5-oxo-3a,4,5,7a-tetrahydrobenzofuran-3(2H)-ylidene)(phenyl)methyl propionate, 5a'**

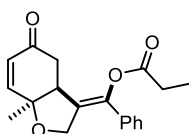

Light yellow liquid, 50.2 mg, 80% yield, PE : EtOAc = 2:1.  $^1\text{H}$  NMR (400 MHz,  $\text{CDCl}_3$ )  $\delta$  7.34 – 7.29 (m, 3H), 7.21 – 7.19 (m, 2H), 6.58 (dd,  $J = 10.3, 1.1$  Hz, 1H), 6.07 (d,  $J = 10.3$  Hz, 1H), 4.50 (d,  $J = 1.3$  Hz, 2H), 3.21 – 3.18 (m, 1H), 2.87 (dd,  $J = 16.6, 4.9$  Hz, 1H), 2.62 (dd,  $J = 16.6, 6.0$  Hz, 1H), 2.55 (q,  $J = 7.6$  Hz, 2H), 1.51 (s, 3H), 1.23 (t,  $J = 7.6$  Hz, 3H) ppm;  $^{13}\text{C}$  NMR (100 MHz,  $\text{CDCl}_3$ )  $\delta$  197.0, 172.1, 150.2, 140.8, 135.1, 130.1, 130.0, 128.7, 128.6, 126.7, 79.6, 68.2, 47.1, 37.1, 27.6, 23.7, 9.2 ppm; FTIR (neat)  $\nu$  2956, 1746, 1675, 1434, 1356, 1021, 776  $\text{cm}^{-1}$ ; HRMS (ESI)  $m/z$ : Calcd. For  $\text{C}_{19}\text{H}_{20}\text{NaO}_4^+$ : 335.1254, Found: 335.1251 ( $\text{M}+\text{Na}^+$ ).

**((E)-7a-methyl-5-oxo-3a,4,5,7a-tetrahydrobenzofuran-3(2H)-ylidene)(phenyl)methyl benzoate, 5a''**

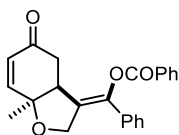

Light yellow liquid, 58.4 mg, 81% yield, PE : EtOAc = 2:1.  $^1\text{H}$  NMR (400 MHz,  $\text{CDCl}_3$ )  $\delta$  8.21 – 8.19 (m, 2H), 7.67 – 7.63 (m, 1H), 7.54 – 7.50 (m, 2H), 7.36 – 7.26 (m, 5H), 6.58 (dd,  $J = 10.3, 1.2$  Hz, 1H), 6.08 (dd,  $J = 10.2, 0.7$  Hz, 1H), 4.62 (dd,  $J = 13.3, 0.5$  Hz, 1H), 4.55 (dd,  $J = 13.3, 2.1$  Hz, 1H), 3.28 – 3.26 (m, 1H), 2.94 (ddd,  $J = 16.7, 4.6, 0.8$  Hz, 1H), 2.58 (dd,  $J = 16.7, 5.9$  Hz, 1H), 1.52 (s, 3H) ppm;  $^{13}\text{C}$  NMR (100 MHz,  $\text{CDCl}_3$ )  $\delta$  197.1, 164.3, 150.3, 140.8, 134.9, 134.0, 130.4, 130.4, 130.2, 128.9, 128.9,

128.8, 128.7, 126.7, 79.8, 68.3, 47.4, 37.2, 23.5 ppm; FTIR (neat)  $\nu$  2927, 1733, 1682, 1450, 1244, 1094, 712  $\text{cm}^{-1}$ ; HRMS (ESI)  $m/z$ : Calcd. For  $\text{C}_{23}\text{H}_{20}\text{NaO}_4^+$ : 383.1254, Found: 383.1250 ( $\text{M}+\text{Na}^+$ ).

**(E)-(7a-methyl-5-oxo-3a,4,5,7a-tetrahydrobenzofuran-3(2H)-ylidene)(p-tolyl) methyl acetate, 5b**

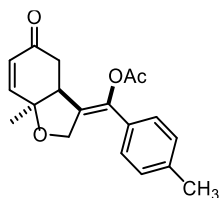

Light yellow solid, 58.0 mg, 93% yield, PE : EtOAc = 2:1, M.p. 96 – 97 °C.  $^1\text{H}$  NMR (400 MHz,  $\text{CDCl}_3$ )  $\delta$  7.15 (d,  $J$  = 8.1 Hz, 2H), 7.09 (d,  $J$  = 8.3 Hz, 2H), 6.58 (dd,  $J$  = 10.2, 1.1 Hz, 1H), 6.07 (d,  $J$  = 10.2 Hz, 1H), 4.48 (s, 2H), 3.2 – 3.18 (m, 1H), 2.87 (dd,  $J$  = 16.7, 4.8 Hz, 1H), 2.63 (dd,  $J$  = 16.6, 6.0 Hz, 1H), 2.33 (s, 3H), 2.24 (s, 3H), 1.50 (s, 3H) ppm;  $^{13}\text{C}$  NMR (100 MHz,  $\text{CDCl}_3$ )  $\delta$  197.1, 168.7, 150.2, 140.8, 138.8, 132.1, 130.1, 129.3, 126.6, 79.6, 68.2, 47.0, 37.1, 23.6, 21.4, 21.0 ppm; FTIR (neat)  $\nu$  2921, 1755, 1690, 1369, 1279, 1200, 1079, 1027, 889, 818  $\text{cm}^{-1}$ ; HRMS (ESI)  $m/z$ : Calcd. For  $\text{C}_{19}\text{H}_{20}\text{NaO}_4^+$ : 335.1254, Found: 335.1256 ( $\text{M}+\text{Na}^+$ ).

**(E)-(4-methoxyphenyl)(7a-methyl-5-oxo-3a,4,5,7a-tetrahydrobenzofuran-3(2H)-ylidene)methyl acetate, 5c**

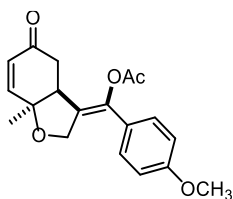

Light yellow solid, 46.6 mg, 71% yield, PE : EtOAc = 2:1, M.p. 105 – 107 °C.  $^1\text{H}$  NMR (400 MHz,  $\text{CDCl}_3$ )  $\delta$  7.14 (d,  $J$  = 8.5 Hz, 2H), 6.86 (d,  $J$  = 8.6 Hz, 2H), 6.57 (d,  $J$  = 10.3 Hz, 1H), 6.07 (d,  $J$  = 10.2 Hz, 1H), 4.47 (s, 2H), 3.79 (s, 3H), 3.18 (t,  $J$  = 5.2 Hz, 1H), 2.87 (dd,  $J$  = 16.6, 4.7 Hz, 1H), 2.62 (dd,  $J$  = 16.6, 5.9 Hz, 1H), 2.24 (s, 3H), 1.50 (s, 1H) ppm;  $^{13}\text{C}$  NMR (100 MHz,  $\text{CDCl}_3$ )  $\delta$  197.1, 168.7, 159.7, 150.2, 140.6, 130.1, 128.5, 128.1, 127.4, 113.9, 79.6, 68.2, 55.4, 47.0, 37.0, 23.6, 21.0 ppm; FTIR (neat)  $\nu$  2929, 1753, 1680, 1606, 1511, 1444, 1370, 1206, 1175, 1097, 1030, 869  $\text{cm}^{-1}$ ; HRMS (ESI)  $m/z$ : Calcd. For  $\text{C}_{19}\text{H}_{20}\text{NaO}_5^+$ : 351.1203, Found: 351.1209 ( $\text{M}+\text{Na}^+$ ).

**(E)-(4-fluorophenyl)(7a-methyl-5-oxo-3a,4,5,7a-tetrahydrobenzofuran-3(2H)-ylidene)methyl acetate, 5d**

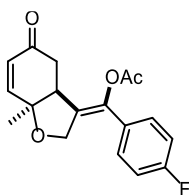

Light yellow solid, 53.1 mg, 84% yield, PE : EtOAc = 2:1, M.p. 77 – 79 °C. <sup>1</sup>H NMR (400 MHz, CDCl<sub>3</sub>) δ 7.22 – 7.17 (m, 2H), 7.06 – 7.00 (m, 2H), 6.57 (dd, *J* = 10.2, 1.1 Hz, 1H), 6.08 (d, *J* = 10.2 Hz, 1H), 4.43 (d, *J* = 1.1 Hz, 2H), 3.19 (t, *J* = 4.7 Hz, 1H), 2.87 (dd, *J* = 16.6, 4.6 Hz, 1H), 2.64 (dd, *J* = 16.6, 5.9 Hz, 1H), 2.25 (s, 3H), 1.51 (s, 3H) ppm; <sup>13</sup>C NMR (100 MHz, CDCl<sub>3</sub>) δ 196.8, 168.6, 162.6 (d, *J* = 249.3 Hz), 150.2, 139.9, 131.2 (d, *J* = 3.2 Hz), 130.2, 130.0, 128.7 (d, *J* = 8.4 Hz), 115.7 (d, *J* = 21.9 Hz), 79.8, 68.0, 47.1, 37.0, 23.5, 20.9 ppm; <sup>19</sup>F NMR (376 MHz, CDCl<sub>3</sub>) δ -111.4 ppm; FTIR (neat) ν 2921, 1750, 1669, 1508, 1370, 1200, 1129, 1097, 1061, 1044, 1017, 836, 793 cm<sup>-1</sup>; HRMS (ESI) *m/z*: Calcd. For C<sub>18</sub>H<sub>17</sub>FN<sub>4</sub>O<sub>4</sub><sup>+</sup>: 339.1003, Found: 339.1008 (M+Na<sup>+</sup>).

**(E)-(4-chlorophenyl)(7a-methyl-5-oxo-3a,4,5,7a-tetrahydrobenzofuran-3(2H)-ylidene)methyl acetate, 5e**

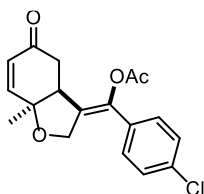

White solid, 51.8 mg, 78% yield, PE : EtOAc = 2:1, M.p. 138 – 139 °C. <sup>1</sup>H NMR (400 MHz, CDCl<sub>3</sub>) δ 7.33 – 7.30 (m, 2H), 7.16 – 7.12 (m, 2H), 6.57 (dd, *J* = 10.3, 1.2 Hz, 1H), 6.08 (d, *J* = 10.3 Hz, 1H), 4.44 (d, *J* = 1.2 Hz, 2H), 3.20 – 3.17 (m, 1H), 2.87 (dd, *J* = 16.7, 4.6 Hz, 1H), 2.64 (dd, *J* = 16.7, 6.0 Hz, 1H), 2.25 (s, 3H), 1.51 (s, 3H) ppm; <sup>13</sup>C NMR (100 MHz, CDCl<sub>3</sub>) δ 196.8, 168.6, 150.1, 139.8, 134.6, 133.5, 130.7, 130.2, 128.9, 128.1, 79.8, 68.0, 47.2, 37.0, 23.5, 20.9 ppm; FTIR (neat) ν 2979, 2845, 1761, 1682, 1493, 1371, 1192, 1094, 1037, 872, 828 cm<sup>-1</sup>; HRMS (ESI) *m/z*: Calcd. For C<sub>18</sub>H<sub>17</sub>ClNaO<sub>4</sub><sup>+</sup>: 355.0708, Found: 355.0714 (M+Na<sup>+</sup>).

**(E)-(4-bromophenyl)(7a-methyl-5-oxo-3a,4,5,7a-tetrahydrobenzofuran-3(2H)-ylidene)methyl acetate, 5f**



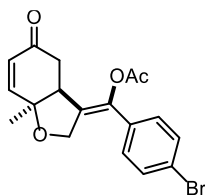

Light yellow solid, 63.2 mg, 84% yield, PE : EtOAc = 2:1, M.p. 152 – 154 °C. <sup>1</sup>H NMR (400 MHz, CDCl<sub>3</sub>) δ 7.49 – 7.45 (m, 2H), 7.09 – 7.06 (m, 2H), 6.57 (dd, *J* = 10.3, 1.2 Hz, 1H), 6.08 (dd, *J* = 10.3, 0.5 Hz, 1H), 4.44 (d, *J* = 1.2 Hz, 2H), 3.20 – 3.17 (m, 1H), 2.86 (dd, *J* = 16.7, 4.6 Hz, 1H), 2.64 (dd, *J* = 16.6, 6.0 Hz, 1H), 2.25 (s, 3H), 1.51 (s, 3H) ppm; <sup>13</sup>C NMR (100 MHz, CDCl<sub>3</sub>) δ 196.7, 168.6, 150.1, 139.8, 133.9, 131.8, 130.8, 130.2, 128.3, 122.9, 79.8, 68.0, 47.2, 36.9, 23.5, 20.9 ppm; FTIR (neat) ν 2923, 1756, 1680, 1490, 1371, 1193, 1093, 1038, 871, 825 cm<sup>-1</sup>; HRMS (ESI) *m/z*: Calcd. For C<sub>18</sub>H<sub>17</sub>BrNaO<sub>4</sub><sup>+</sup>: 399.0202, Found: 399.0209 (M+Na<sup>+</sup>).

**(*E*)-methyl 4-(acetoxymethyl)benzoate, 5g**

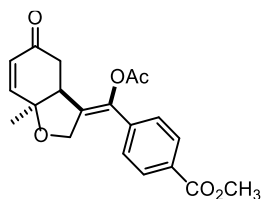

White solid, 50.8 mg, 71% yield, PE : EtOAc = 2:1, M.p. 152 – 154 °C. <sup>1</sup>H NMR (400 MHz, CDCl<sub>3</sub>) δ 8.03 – 8.00 (m, 2H), 7.28 – 7.26 (m, 2H), 6.59 (dd, *J* = 10.3, 1.1 Hz, 1H), 6.09 (d, *J* = 10.2 Hz, 1H), 4.54 – 4.46 (m, 2H), 3.92 (s, 3H), 3.22 (t, *J* = 5.2 Hz, 1H), 2.88 (dd, *J* = 16.6, 4.6 Hz, 1H), 2.66 (dd, *J* = 16.6, 6.0 Hz, 1H), 2.28 (s, 3H), 1.52 (s, 3H) ppm; <sup>13</sup>C NMR (100 MHz, CDCl<sub>3</sub>) δ 196.6, 168.5, 166.4, 150.1, 139.9, 139.2, 132.2, 130.2, 130.1, 129.8, 126.5, 79.7, 68.0, 52.3, 47.3, 37.0, 23.5, 20.8 ppm; FTIR (neat) ν 2835, 1764, 1715, 1701, 1376, 1286, 1202, 1113, 1094, 1016, 862, 752 cm<sup>-1</sup>; HRMS (ESI) *m/z*: Calcd. For C<sub>20</sub>H<sub>20</sub>NaO<sub>6</sub><sup>+</sup>: 379.1152, Found: 379.1154 (M+Na<sup>+</sup>).

**(*E*)-(3-chlorophenyl)(7a-methyl-5-oxo-3a,4,5,7a-tetrahydrobenzofuran-3(2H)-ylidene)methyl acetate, 5h**

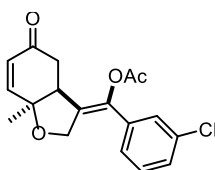

Light yellow solid, 43.8 mg, 66% yield, PE : EtOAc = 2:1, M.p. 113 – 115 °C. <sup>1</sup>H NMR

(400 MHz, CDCl<sub>3</sub>)  $\delta$  7.29 – 7.27 (m, 2H), 7.19 – 7.18 (m, 1H), 7.10 – 7.08 (m, 1H), 6.58 (dd,  $J = 10.3, 1.2$  Hz, 1H), 6.09 (dd,  $J = 10.2, 0.5$  Hz, 1H), 4.47 (d,  $J = 1.3$  Hz, 2H), 3.20 – 3.18 (m, 1H), 2.86 (dd,  $J = 16.7, 4.7$  Hz, 1H), 2.64 (dd,  $J = 16.6, 6.0$  Hz, 1H), 2.26 (s, 3H), 1.52 (s, 3H) ppm; <sup>13</sup>C NMR (100 MHz, CDCl<sub>3</sub>)  $\delta$  196.7, 168.6, 150.1, 139.4, 136.8, 134.6, 131.4, 130.2, 129.9, 128.9, 126.8, 125.0, 79.8, 68.0, 47.2, 37.0, 23.5, 20.9 ppm; FTIR (neat)  $\nu$  2926, 1754, 1678, 1593, 1562, 1476, 1371, 1175, 1037, 880, 726 cm<sup>-1</sup>; HRMS (ESI)  $m/z$ : Calcd. For C<sub>18</sub>H<sub>17</sub>ClNaO<sub>4</sub><sup>+</sup>: 355.0708, Found: 355.0708 (M+Na<sup>+</sup>).

**(*E*)-(7a-methyl-5-oxo-3a,4,5,7a-tetrahydrobenzofuran-3(2*H*)-ylidene)(thiophen-2-yl)methyl acetate, 5i**

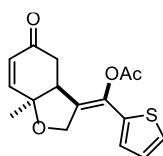

Red-brown solid, 53.2 mg, 88% yield, PE : EtOAc = 2:1, M.p. 84 – 87 °C. <sup>1</sup>H NMR (400 MHz, CDCl<sub>3</sub>)  $\delta$  7.32 (dd,  $J = 5.1, 1.1$  Hz, 1H), 7.03 (dd,  $J = 5.1, 3.7$  Hz, 1H), 6.89 (dd,  $J = 3.7, 0.6$  Hz, 1H), 6.60 (dd,  $J = 10.3, 1.1$  Hz, 1H), 6.05 (dd,  $J = 10.3, 0.6$  Hz, 1H), 4.73 (d,  $J = 13.8$  Hz, 1H), 4.51 (dd,  $J = 13.8, 2.4$  Hz, 1H), 3.17 (td,  $J = 4.9, 1.1$  Hz, 1H), 2.90 (ddd,  $J = 16.6, 5.1, 0.7$  Hz, 1H), 2.61 (dd,  $J = 16.6, 5.8$  Hz, 1H), 2.31 (s, 3H), 1.51 (s, 3H) ppm; <sup>13</sup>C NMR (100 MHz, CDCl<sub>3</sub>)  $\delta$  197.0, 168.5, 150.2, 137.6, 135.5, 130.1, 129.6, 127.6, 126.3, 125.5, 80.0, 68.5, 47.6, 36.9, 23.4, 20.9 ppm; FTIR (neat)  $\nu$  2926, 1750, 1685, 1418, 1371, 1192, 1090, 1042, 1005, 837, 718 cm<sup>-1</sup>; HRMS (ESI)  $m/z$ : Calcd. For C<sub>16</sub>H<sub>16</sub>NaSO<sub>4</sub><sup>+</sup>: 327.0662, Found: 327.0664 (M+Na<sup>+</sup>).

**(*E*)-(7a-methyl-5-oxo-3a,4,5,7a-tetrahydrobenzofuran-3(2*H*)-ylidene)(thiophen-3-yl)methyl acetate, 5j**

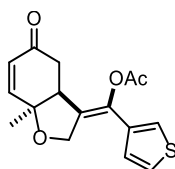

Light yellow solid, 43.9 mg, 72% yield, PE : EtOAc = 2:1, M.p. 86 – 88 °C. <sup>1</sup>H NMR (400 MHz, CDCl<sub>3</sub>)  $\delta$  7.31 (dd,  $J = 5.1, 3.0$  Hz, 1H), 7.11 (dd,  $J = 3.0, 1.2$  Hz, 1H), 6.95 (dd,  $J = 5.1, 1.3$  Hz, 1H), 6.58 (dd,  $J = 10.2, 1.1$  Hz, 1H), 6.05 (dd,  $J = 10.2, 0.5$  Hz,

1H), 4.64 (d,  $J = 13.5$  Hz, 1H), 4.50 (dd,  $J = 13.3, 2.3$  Hz, 1H), 3.16 (td,  $J = 4.9, 1.0$  Hz, 1H), 2.89 (ddd,  $J = 16.5, 5.0, 0.5$  Hz, 1H), 2.62 (dd,  $J = 16.6, 5.8$  Hz, 1H), 2.29 (s, 3H), 1.51 (s, 3H) ppm;  $^{13}\text{C}$  NMR (100 MHz,  $\text{CDCl}_3$ )  $\delta$  197.0, 168.6, 150.1, 136.7, 136.0, 130.1, 129.4, 126.3, 125.6, 123.2, 79.8, 68.3, 47.3, 37.0, 23.5, 20.9 ppm; FTIR (neat)  $\nu$  2971, 1758, 1678, 1370, 1187, 1097, 1037, 885, 846, 782, 733  $\text{cm}^{-1}$ ; HRMS (ESI)  $m/z$ : Calcd. For  $\text{C}_{16}\text{H}_{16}\text{NaSO}_4^+$ : 327.0662, Found: 327.0664 ( $\text{M}+\text{Na}^+$ ).

**(E)-1-(7a-methyl-5-oxo-3a,4,5,7a-tetrahydrobenzofuran-3(2H)-ylidene)ethyl acetate, 5k**

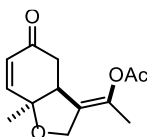

Light yellow liquid, 34.0 mg, 72% yield, PE : EtOAc = 2:1.  $^1\text{H}$  NMR (400 MHz,  $\text{CDCl}_3$ )  $\delta$  6.53 (dd,  $J = 10.3, 1.4$  Hz, 1H), 6.00 (dd,  $J = 10.2, 0.9$  Hz, 1H), 4.44 – 4.40 (m, 1H), 4.23 – 4.19 (m, 1H), 3.00 – 2.97 (m, 1H), 2.90 (ddd,  $J = 16.5, 4.2, 0.9$  Hz, 1H), 2.54 (dd,  $J = 16.5, 5.6$  Hz, 1H), 2.18 (s, 3H), 1.79 – 1.78 (m, 3H), 1.48 (s, 3H) ppm;  $^{13}\text{C}$  NMR (100 MHz,  $\text{CDCl}_3$ )  $\delta$  197.4, 168.7, 150.6, 139.0, 129.9, 126.5, 80.6, 67.7, 46.2, 37.0, 23.2, 21.0, 18.1 ppm; FTIR (neat)  $\nu$  3359, 2929, 1719, 1679, 1498, 1374, 1187, 1156, 1016, 939, 868  $\text{cm}^{-1}$ ; HRMS (ESI)  $m/z$ : Calcd. For  $\text{C}_{13}\text{H}_{14}\text{O}_4\text{Na}^+$ : 259.0941, Found: 259.0946 ( $\text{M}+\text{Na}^+$ ).

**(E)-(7a-ethyl-5-oxo-3a,4,5,7a-tetrahydrobenzofuran-3(2H)-ylidene)(phenyl) methyl acetate, 5l**

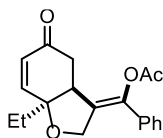

Light yellow liquid, 56.9 mg, 92% yield, PE : EtOAc = 2:1.  $^1\text{H}$  NMR (400 MHz,  $\text{CDCl}_3$ )  $\delta$  7.36 – 7.27 (m, 3H), 7.21 – 7.19 (m, 2H), 6.61 (dd,  $J = 10.3, 1.0$  Hz, 1H), 6.14 (d,  $J = 10.2$  Hz, 1H), 4.51 (dd,  $J = 13.2, 2.0$  Hz, 1H), 4.46 (d,  $J = 13.2$  Hz, 1H), 3.27 (dd,  $J = 5.8, 5.1$  Hz, 1H), 2.86 (dd,  $J = 16.7, 5.0$  Hz, 1H), 2.63 (dd,  $J = 16.7, 6.2$  Hz, 1H), 2.25 (s, 3H), 1.84 – 1.79 (m, 2H), 1.02 (t,  $J = 7.5$  Hz, 3H) ppm;  $^{13}\text{C}$  NMR (100 MHz,  $\text{CDCl}_3$ )  $\delta$  197.2, 168.7, 149.3, 140.7, 134.9, 130.9, 130.5, 128.7, 128.6, 126.6, 82.0, 67.9, 44.6,

37.4, 30.1, 20.9, 8.2 ppm; FTIR (neat)  $\nu$  2969, 1758, 1682, 1370, 1200, 1030, 895  $\text{cm}^{-1}$ ; HRMS (ESI)  $m/z$ : Calcd. For  $\text{C}_{19}\text{H}_{20}\text{NaO}_4^+$ : 335.1254, Found: 335.1258 ( $\text{M}+\text{Na}^+$ ).

**(E)-(7a-isopropyl-5-oxo-3a,4,5,7a-tetrahydrobenzofuran-3(2H)-ylidene)(phenyl) methyl acetate, 5m**

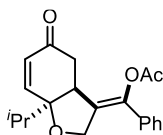

Light yellow solid, 54.8 mg, 84% yield, PE : EtOAc = 2:1, M.p. 84 – 86 °C.  $^1\text{H}$  NMR (400 MHz,  $\text{CDCl}_3$ )  $\delta$  7.37 – 7.29 (m, 3H), 7.20 – 7.17 (m, 2H), 6.61 (dd,  $J = 10.4, 1.0$  Hz, 1H), 6.22 (d,  $J = 10.5$  Hz, 1H), 4.49 (dd,  $J = 13.1, 1.9$  Hz, 1H), 4.42 (d,  $J = 13.1$  Hz, 1H), 3.36 (t,  $J = 5.5$  Hz, 1H), 2.83 (dd,  $J = 17.0, 4.5$  Hz, 1H), 2.64 (dd,  $J = 17.0, 6.7$  Hz, 1H), 2.26 (s, 3H), 2.09 – 2.03 (m, 1H), 1.06 (d,  $J = 7.0$  Hz, 3H), 1.01 (d,  $J = 6.9$  Hz, 3H) ppm;  $^{13}\text{C}$  NMR (100 MHz,  $\text{CDCl}_3$ )  $\delta$  197.5, 168.7, 148.0, 140.5, 134.9, 131.8, 131.3, 128.7, 128.6, 126.6, 84.1, 67.6, 42.5, 38.2, 35.0, 21.0, 17.4, 17.3 ppm; FTIR (neat)  $\nu$  2924, 1754, 1682, 1493, 1368, 1200, 1043, 899, 785  $\text{cm}^{-1}$ ; HRMS (ESI)  $m/z$ : Calcd. For  $\text{C}_{20}\text{H}_{22}\text{NaO}_4^+$ : 349.1410, Found: 349.1414 ( $\text{M}+\text{Na}^+$ ).

**(E)-(7a-benzyl-5-oxo-3a,4,5,7a-tetrahydrobenzofuran-3(2H)-ylidene)(phenyl) methyl acetate, 5n**

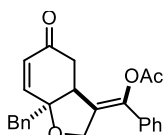

Light yellow liquid, 68.8 mg, 92% yield, PE : EtOAc = 2:1.  $^1\text{H}$  NMR (400 MHz,  $\text{CDCl}_3$ )  $\delta$  7.35 – 7.27 (m, 5H), 7.26 – 7.23 (m, 3H), 7.20 – 7.17 (m, 2H), 6.54 (dd,  $J = 10.3, 1.2$  Hz, 1H), 6.09 (d,  $J = 10.4$  Hz, 1H), 4.49 (d,  $J = 1.5$  Hz, 2H), 3.31 (t,  $J = 4.7$  Hz, 1H), 3.09 (dd,  $J = 33.7, 13.8$  Hz, 2H), 2.76 (dd,  $J = 16.8, 4.4$  Hz, 1H), 2.31 (dd,  $J = 16.8, 6.1$  Hz, 1H), 2.23 (s, 3H) ppm;  $^{13}\text{C}$  NMR (100 MHz,  $\text{CDCl}_3$ )  $\delta$  196.9, 168.7, 148.9, 140.8, 135.3, 135.0, 131.0, 130.4, 129.8, 128.8, 128.6, 128.5, 127.2, 126.6, 82.0, 68.0, 45.2, 43.8, 37.0, 20.9 ppm; FTIR (neat)  $\nu$  3029, 2917, 1762, 1683, 1495, 1369, 1201, 1038, 897  $\text{cm}^{-1}$ ; HRMS (ESI)  $m/z$ : Calcd. For  $\text{C}_{24}\text{H}_{22}\text{NaO}_4^+$ : 397.1410, Found: 397.1411 ( $\text{M}+\text{H}^+$ ).

**(E)-(5-oxo-7a-phenyl-3a,4,5,7a-tetrahydrobenzofuran-3(2H)-ylidene)(phenyl) methyl acetate, 5o**

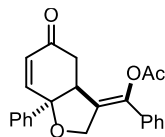

White solid, 71.5 mg, 99% yield, PE : EtOAc = 2:1, M.p. 62 – 64 °C. <sup>1</sup>H NMR (400 MHz, CDCl<sub>3</sub>) δ 7.49 – 7.46 (m, 2H), 7.42 – 7.28 (m, 6H), 7.22 – 7.20 (m, 2H), 6.66 (dd, *J* = 10.2, 1.3 Hz, 1H), 6.31 (dd, *J* = 10.3, 0.5 Hz, 1H), 4.72 – 4.68 (m, 2H), 3.47 (t, *J* = 5.1 Hz, 1H), 2.90 (ddd, *J* = 16.7, 4.4, 0.6 Hz, 1H), 2.70 (dd, *J* = 16.7, 5.9 Hz, 1H), 2.20 (s, 3H) ppm; <sup>13</sup>C NMR (100 MHz, CDCl<sub>3</sub>) δ 197.0, 168.6, 148.2, 140.6, 140.2, 134.9, 131.1, 129.5, 128.9, 128.8, 128.6, 128.5, 126.7, 125.4, 83.5, 68.6, 49.1, 36.6, 20.9 ppm; FTIR (neat) ν 2851, 1757, 1686, 1369, 1201, 1042, 897, 761 cm<sup>-1</sup>; HRMS (ESI) *m/z*: Calcd. For C<sub>23</sub>H<sub>20</sub>NaO<sub>4</sub><sup>+</sup>: 383.1254, Found: 383.1264 (M+Na<sup>+</sup>).

**(E)-(7,7a-dimethyl-5-oxo-3a,4,5,7a-tetrahydrobenzofuran-3(2H)-ylidene)(phenyl) methyl acetate, 5p**

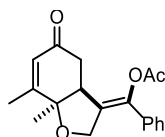

Off-white solid, 44.3 mg, 71% yield, PE:EtOAc = 2:1, M.p. 148 – 150 °C. <sup>1</sup>H NMR (400 MHz, CDCl<sub>3</sub>) δ 7.36 – 7.27 (m, 3H), 7.20 – 7.17 (m, 2H), 5.98 – 5.97 (m, 1H), 4.45 (d, *J* = 13.5 Hz, 1H), 4.29 (dd, *J* = 13.2, 2.3 Hz, 1H), 3.19 – 3.16 (m, 1H), 2.95 (ddd, *J* = 16.9, 3.6, 0.8 Hz, 1H), 2.64 (dd, *J* = 16.9, 6.0 Hz, 1H), 2.26 (s, 3H), 1.98 (d, *J* = 1.3 Hz, 3H), 1.54 (s, 3H) ppm; <sup>13</sup>C NMR (100 MHz, CDCl<sub>3</sub>) δ 196.2, 168.7, 160.8, 140.6, 135.1, 129.8, 128.9, 128.7, 128.6, 126.7, 82.2, 68.0, 48.3, 36.7, 22.2, 21.0, 18.1 ppm; FTIR (neat) ν 2918, 1752, 1660, 1444, 1367, 1216, 1112, 1062, 1020, 909, 779, cm<sup>-1</sup>; HRMS (ESI) *m/z*: Calcd. For C<sub>19</sub>H<sub>20</sub>NaO<sub>4</sub><sup>+</sup>: 335.1254, Found: 335.1258 (M+Na<sup>+</sup>).

## 6. Determination the configuration of product 2a and 3n via NOE

To confirm the relative configuration of the carbon-carbon double bond in product **2a**, a 2D-NOE spectrum was then collected as shown in Figure S1. The NOE signal is found between the H atom of methylene group (-OCH<sub>2</sub>-) and the H atom of the phenyl ring,

which confirmed the relative configuration of the carbon-carbon double bond in product **2a** as drawn in Figure S1

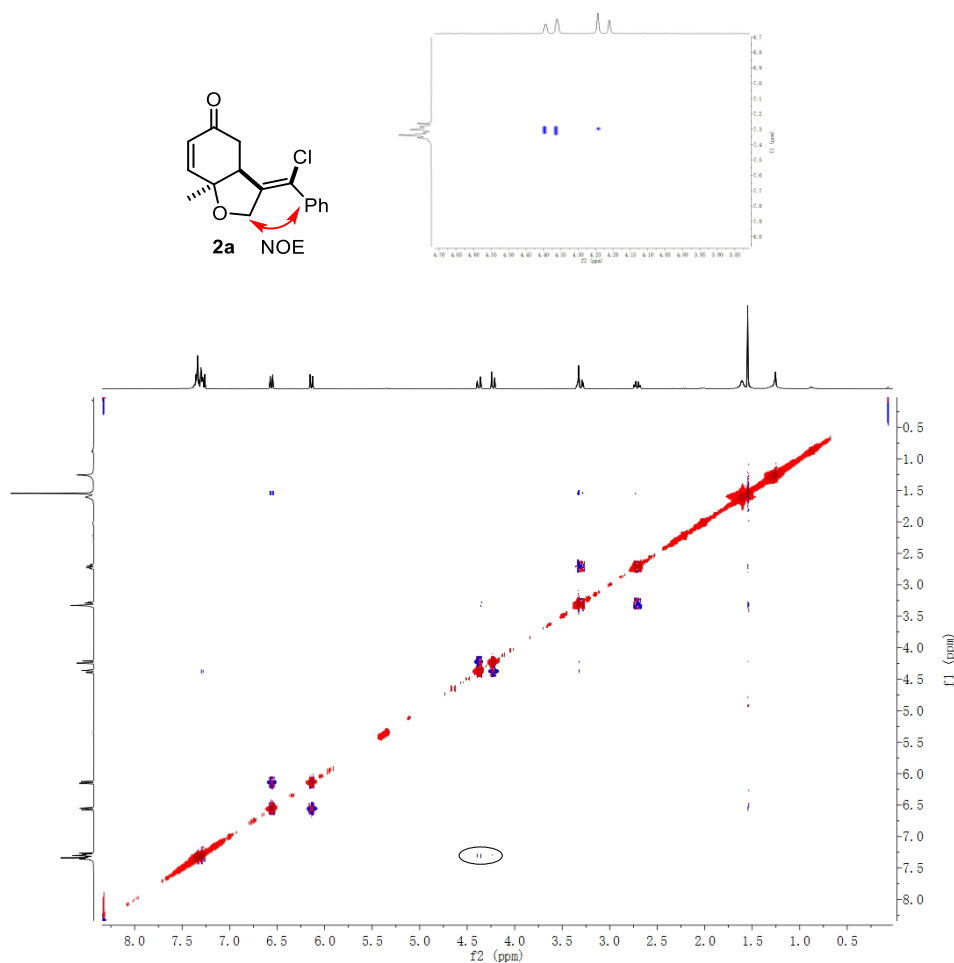

**Figure S1** 2D-NOE spectrum of product **2a**

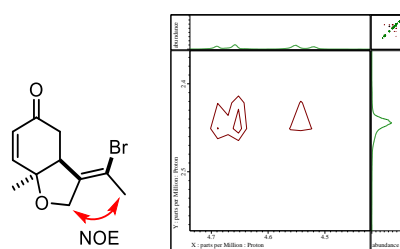

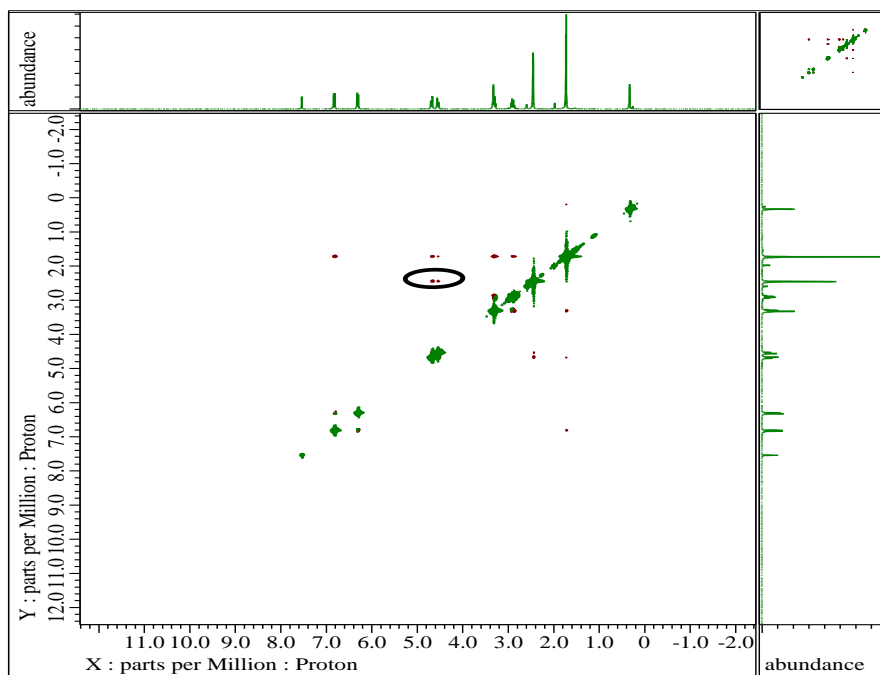

**Figure S2** 2D-NOE spectrum of product **3n**

To confirm the relative configuration of the carbon-carbon double bond in product **3n**, a 2D-NOE spectrum was then collected as shown in Figure S2. The NOE signal is found between the H atom of methylene group (-OCH<sub>2</sub>-) and the H atom of methyl group on double bond, which confirmed the relative configuration of the carbon-carbon double bond in product **3n** as drawn in Figure S2

## 7. Scale-up synthesis and synthetic transformations

### 7.1 General procedure for Scale-up synthesis of compound **2a**

A sealed Schlenk tube (250 mL) charged with a stir bar was added [RuCl<sub>2</sub>(*p*-cymene)]<sub>2</sub> (153 mg, 0.25 mmol, 5 mol%), alkynes **1** (1.19 g, 5.0 mmol, 1.0 equiv), and then <sup>n</sup>Bu<sub>4</sub>NF·3H<sub>2</sub>O (3.16 g, 10.0 mmol, 2.0 equiv). The tube was purged three times by vacuum and N<sub>2</sub>, then anhydrous DCE (100 mL, 0.05 M) was added. At last, glacial HOAc (5.7 mL, 100.0 mmol, 20.0 equiv) was added and the resulted mixture was stirred and heated at 100 °C in an oil bath for 48. Upon completion, the reaction mixture was cooled to room temperature, and quenched with aqueous saturated NaHCO<sub>3</sub> and then extracted with EtOAc (100 mL × 3), and then dried over anhydrous Na<sub>2</sub>SO<sub>4</sub>, filtered and concentrated in vacuo. The residue was purified by column chromatography using

petroleum ether/ethyl acetate mixture as eluent, affording product **2a** with 71% yield.

## 7.2 General procedure for Scale-up synthesis of compound **5a**

A sealed Schlenk tube (100 mL) charged with a stir bar was added RuCp\*(cod)Cl (76 mg, 0.2 mmol, 10 mol%), 1, 6-enyne **1** (476 mg, 2.0 mmol, 1.0 equiv) and AgOAc (167 mg, 1.0 mmol, 0.5 equiv). The tube was purged three times by vacuum and N<sub>2</sub>, then anhydrous THF (20.0 mL, 0.1 M) was added. At last, glacial HOAc (2.3 mL, 40.0 mmol, 20.0 equiv) was added and the resulted mixture was stirred and heated at 60 °C in an oil bath for 15 h. Upon completion, the reaction mixture was cooled to room temperature, and quenched with aqueous saturated NaHCO<sub>3</sub> and then extracted with EtOAc (40 mL × 3), and then dried over anhydrous Na<sub>2</sub>SO<sub>4</sub>, filtered and concentrated in vacuo. The residue was purified by column chromatography using petroleum ether/ethyl acetate mixture as eluent, affording product **5a** with 83% yield.

## 7.3 Procedure for synthesis of compound **2a-1**

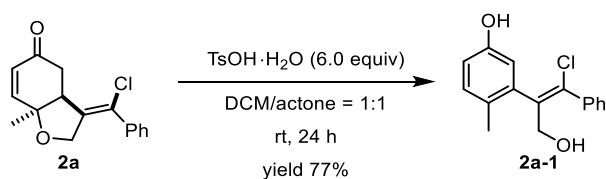

A sealed tube (25 mL) charged with a stir bar was added **2a** (54.8 mg, 0.2 mmol) and *p*-toluenesulfonic acid monohydrate (228.2 mg, 1.2 mmol) and DCM/acetone (2.0 mL, 1/1, v/v). The mixture was stirred 24 h at room temperature. Then it was quenched by aqueous saturated NaHCO<sub>3</sub> (30 mL), extracted with EtOAc (20 mL × 3), dried over anhydrous Na<sub>2</sub>SO<sub>4</sub>, filtered and concentrated in vacuo. The residue was purified by flash column chromatography (petroleum ether/EtOAc = 2/1) to afford **2a-1**.<sup>[3]</sup>

White solid, 42.2 mg, 77% yield, PE : EtOAc = 2:1, M.p. 101 – 103 °C. <sup>1</sup>H NMR (400 MHz, DMSO-*d*<sub>6</sub>) δ 9.17 (s, 1H), 7.56 – 7.53 (m, 2H), 7.49 – 7.41 (m, 3H), 7.03 (d, *J* = 8.1 Hz, 1H), 6.64 – 6.59 (m, 2H), 4.96 (t, *J* = 5.5 Hz, 1H), 4.07 (dd, *J* = 11.8, 5.3 Hz, 1H), 4.00 (dd, *J* = 11.8, 5.7 Hz, 1H), 2.19 (s, 3H) ppm; <sup>13</sup>C NMR (400 MHz, DMSO-*d*<sub>6</sub>) δ 155.0, 140.0, 139.3, 137.5, 130.54, 130.49, 128.9, 128.4, 125.4, 115.1, 114.2, 62.4, 18.1 ppm; FTIR (neat) ν 3349, 3175, 1606, 1452, 1234, 1019, 888, 736 cm<sup>-1</sup>; HRMS



(ESI)  $m/z$ : Calcd. For  $C_{16}H_{15}ClO_2Na^+$ : 297.0653, Found: 297.0657 ( $M+Na^+$ ).

#### 7.4 Procedure for synthesis of compound 5a-1

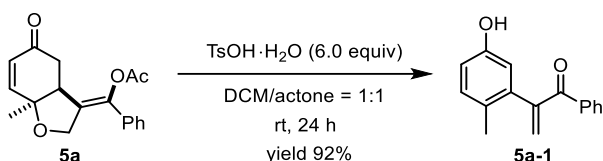

A sealed tube (25 mL) charged with a stir bar was added **5a** (59.6 mg, 0.2 mmol) and *p*-toluenesulfonic acid monohydrate (228.2 mg, 1.2 mmol) and DCM/acetone (2.0 mL, 1/1, v/v). The mixture was stirred 24 h at room temperature. Then it was quenched by aqueous saturated  $NaHCO_3$  (30 mL), extracted with EtOAc (20 mL  $\times$  3), dried over anhydrous  $Na_2SO_4$ , filtered and concentrated in vacuo. The residue was purified by flash column chromatography (petroleum ether/EtOAc = 2/1) to afford **5a-1**.<sup>[3]</sup>

#### 2-(5-hydroxy-2-methylphenyl)-1-phenylprop-2-en-1-one, **5a-1**<sup>[4]</sup>

Colorless liquid, 43.6 mg, 92% yield, PE : EtOAc = 5:1.  $^1H$  NMR (400 MHz,  $CDCl_3$ )  $\delta$  7.90 – 7.88 (m, 2H), 7.58 – 7.54 (m, 1H), 7.46 – 7.42 (m, 2H), 6.98 (d,  $J$  = 8.2 Hz, 1H), 6.73 (d,  $J$  = 2.7 Hz, 1H), 6.69 (dd,  $J$  = 8.2, 2.7 Hz, 1H), 5.98 (dd,  $J$  = 17.7, 1.0 Hz, 2H), 5.73 (s, 1H), 2.10 (s, 3H) ppm;  $^{13}C$  NMR (400 MHz,  $CDCl_3$ )  $\delta$  197.1, 154.0, 149.0, 139.2, 137.20, 132.9, 131.4, 130.0, 128.5, 128.4, 127.5, 117.0, 115.6, 19.6 ppm.

#### 7.5 Procedure for synthesis of compound 6

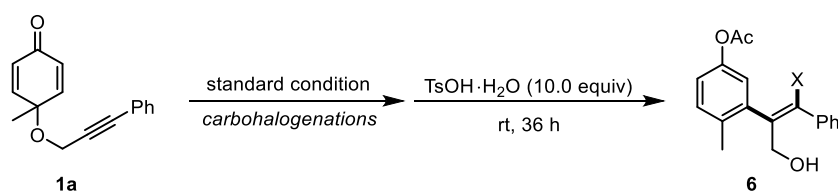

Following the general procedure of the above carbohalogenations, *p*-toluenesulfonic acid monohydrate (380 mg, 2.0 mmol, 10.0 equiv) was directly added into the reaction mixture after it was cooled to room temperature, and the resulted mixture was stirred at room temperature for 48 h. Upon completion, the reaction mixture was quenched with aqueous saturated  $NaHCO_3$  and extracted with EtOAc (20 mL  $\times$  3), and then dried over anhydrous  $Na_2SO_4$ , then filtered and concentrated in vacuo. The residue was purified by column chromatography using petroleum ether/ethyl acetate mixture as the eluent to

afford product **6**.

**(E)-3-(1-chloro-3-hydroxy-1-phenylprop-1-en-2-yl)-4-methylphenyl acetate, 6a**

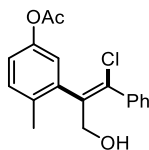

Colorless liquid, 41.2 mg, 65% yield, PE : EtOAc = 5:1.  $^1\text{H}$  NMR (400 MHz,  $\text{CDCl}_3$ )  $\delta$  7.49 – 7.46 (m, 2H), 7.44 – 7.39 (m, 3H), 7.12 (d,  $J$  = 8.2 Hz, 1H), 6.74 (dd,  $J$  = 8.2, 2.7 Hz, 1H), 6.67 (d,  $J$  = 2.7 Hz, 1H), 4.99 (bs, 1H), 4.74 (d,  $J$  = 12.0 Hz, 1H), 4.69 (d,  $J$  = 12.0 Hz, 1H), 2.29 (s, 3H), 1.94 (s, 3H) ppm;  $^{13}\text{C}$  NMR (100 MHz,  $\text{CDCl}_3$ )  $\delta$  170.8, 153.7, 139.1, 137.5, 135.7, 133.3, 131.3, 129.4, 129.0, 128.7, 128.2, 115.2, 115.1, 65.4, 20.9, 18.4 ppm; FTIR (neat)  $\nu$  2925, 1734, 1445, 1377, 1230, 1028, 743, 697  $\text{cm}^{-1}$ ; HRMS (ESI)  $m/z$ : Calcd. For  $\text{C}_{18}\text{H}_{17}\text{ClO}_3\text{Na}^+$ : 339.0758, Found: 339.0772 ( $\text{M}+\text{Na}^+$ ).

**(E)-3-(1-bromo-3-hydroxy-1-phenylprop-1-en-2-yl)-4-methylphenyl acetate, 6b**

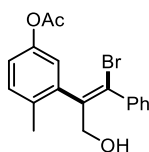

Colorless liquid, 43.8 mg, 61% yield, PE : EtOAc = 5:1.  $^1\text{H}$  NMR (400 MHz,  $\text{CDCl}_3$ )  $\delta$  7.46 – 7.34 (m, 5H), 7.11 (d,  $J$  = 8.2 Hz, 1H), 6.74 (dd,  $J$  = 8.2, 2.7 Hz, 1H), 6.66 (d,  $J$  = 2.7 Hz, 1H), 5.28 (bs, 1H), 4.69 (d,  $J$  = 12.1 Hz, 1H), 4.64 (d,  $J$  = 12.0 Hz, 1H), 2.30 (s, 3H), 1.92 (s, 3H) ppm;  $^{13}\text{C}$  NMR (100 MHz,  $\text{CDCl}_3$ )  $\delta$  170.9, 153.7, 140.8, 139.1, 136.6, 131.3, 129.2, 129.0, 128.6, 127.8, 127.6, 115.1, 65.0, 20.9, 18.4 ppm; FTIR (neat)  $\nu$  2971, 1669, 1495, 1378, 1083, 876, 730  $\text{cm}^{-1}$ ; HRMS (ESI)  $m/z$ : Calcd. For  $\text{C}_{18}\text{H}_{17}\text{BrO}_3\text{Na}^+$ : 383.0253, Found: 383.0234 ( $\text{M}+\text{Na}^+$ ).

**(E)-3-(3-hydroxy-1-iodo-1-phenylprop-1-en-2-yl)-4-methylphenyl acetate, 6c**

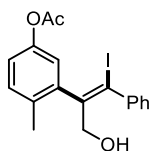

Colorless liquid, 43.1 mg, 53% yield, PE : EtOAc = 5:1.  $^1\text{H}$  NMR (400 MHz,  $\text{CDCl}_3$ )  $\delta$  7.38 – 7.37 (m, 4H), 7.34 – 7.28 (m, 1H), 7.12 (d,  $J$  = 8.2 Hz, 1H), 6.75 (dd,  $J$  = 8.2, 2.7 Hz, 1H), 6.61 (d,  $J$  = 2.7 Hz, 1H), 5.07 (bs, 1H), 4.66 (d,  $J$  = 12.1 Hz, 1H), 4.61 (d,

$J = 12.1$  Hz), 2.30 (s, 3H), 1.90 (s, 3H) ppm;  $^{13}\text{C}$  NMR (100 MHz,  $\text{CDCl}_3$ )  $\delta$  170.7, 153.7, 144.1, 143.1, 142.6, 131.5, 128.8, 128.6, 128.5, 127.4, 115.22, 115.19, 106.9, 63.3, 20.9, 18.4 ppm; FTIR (neat)  $\nu$  2923, 1599, 1498, 1230, 1176, 1024, 825  $\text{cm}^{-1}$ ; HRMS (ESI)  $m/z$ : Calcd. For  $\text{C}_{18}\text{H}_{17}\text{IO}_3\text{Na}^+$ : 431.0115, Found: 431.0097 ( $\text{M}+\text{Na}^+$ ).

## 6.6 Procedure for synthesis of compound 7

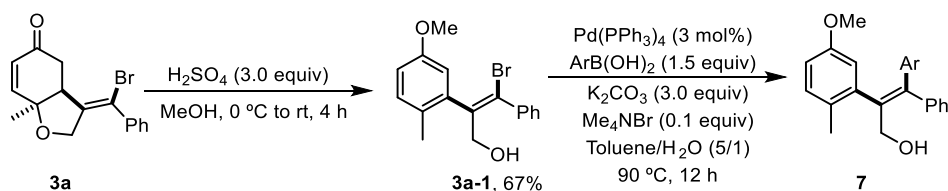

A sealed tube (25 mL) charged with a stir bar was added **3a** (95.7 mg, 0.3 mmol, 1.0 equiv) and MeOH (8.0 mL), then followed by conc.  $\text{H}_2\text{SO}_4$  (45  $\mu\text{L}$ , 0.9 mmol, 3.0 equiv) at 0 °C. The reaction mixture was stirred at room temperature for 4 h and quenched with aqueous saturated  $\text{NaHCO}_3$ , which was extracted with EtOAc (30 mL  $\times$  3). The organic phase was combined, dried with anhydrous  $\text{Na}_2\text{SO}_4$ , and then evaporated under reduced pressure. The residue was purified by silica gel chromatography to afford the product **3a-1** in 67% yield.<sup>[5]</sup>

A sealed tube (25 mL) charged with a stir bar was added  $\text{Pd}(\text{PPh}_3)_4$  (6.9 mg, 0.006 mmol, 3 mol%), **3a-1** (66.5 mg, 0.20 mmol, 1.0 equiv) and  $\text{Me}_4\text{NBr}$  (3.1 mg, 0.02 mmol, 0.1 equiv). The tube was purged three times by vacuum and  $\text{N}_2$ , then anhydrous toluene (2.0 mL, 0.1 M) and 2 mol/L  $\text{K}_2\text{CO}_3$  (0.4 mL) was added. The resulted mixture was heated at 90 °C in an oil bath and stirred for 12 h. Upon completion, the reaction mixture was cooled to room temperature, and extracted with EtOAc (20 mL  $\times$  3), and then dried over anhydrous  $\text{Na}_2\text{SO}_4$ , filtered and concentrated in vacuo. The residue was purified by column chromatography using petroleum ether/ethyl acetate mixture as eluent to afford product **7**<sup>[6]</sup>.

### (*E*)-3-bromo-2-(5-methoxy-2-methylphenyl)-3-phenylprop-2-en-1-ol, **3a-1**

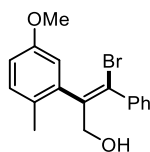

Colorless liquid, 66.8 mg, 67%, PE : EtOAc = 5:1.  $^1\text{H}$  NMR (400 MHz,  $\text{CDCl}_3$ )  $\delta$  7.50

– 7.48 (m, 2H), 7.43 – 7.33 (m, 3H), 7.19 (d,  $J = 8.4$  Hz, 1H), 6.83 (dd,  $J = 8.4, 2.7$  Hz, 1H), 6.74 (d,  $J = 2.7$  Hz, 1H), 4.25 (d,  $J = 12.3$  Hz, 1H), 4.17 (d,  $J = 12.3$  Hz, 1H), 3.82 (s, 3H), 2.32 (s, 3H), 1.53 (bs, 1H) ppm;  $^{13}\text{C}$  NMR (100 MHz,  $\text{CDCl}_3$ )  $\delta$  157.8, 141.1, 140.7, 139.4, 131.4, 129.1, 129.0, 128.5, 127.9, 125.0, 113.8, 113.5, 63.9, 55.5, 18.4 ppm; FTIR (neat)  $\nu$  2921, 1743, 1603, 1495, 1407, 1290, 1216, 1045  $\text{cm}^{-1}$ ; HRMS (ESI)  $m/z$ : Calcd. For  $\text{C}_{17}\text{H}_{21}\text{BrNO}_2^+$ : 350.0750, Found: 350.0732 ( $\text{M}+\text{NH}_4^+$ ).

**(E)-2-(5-methoxy-2-methylphenyl)-3-phenyl-3-(p-tolyl)prop-2-en-1-ol, 7a**

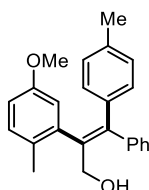

Colorless liquid, 56.4 mg, 82% yield, PE : EtOAc = 5:1.  $^1\text{H}$  NMR (400 MHz,  $\text{CDCl}_3$ )  $\delta$  7.39 – 7.28 (m, 5H), 6.97 (d,  $J = 8.4$  Hz, 1H), 6.84 – 6.79 (m, 5H), 6.69 (dd,  $J = 8.4, 2.8$  Hz, 1H), 4.40 (dd,  $J = 12.0, 5.5$  Hz, 1H), 4.31 (dd,  $J = 12.0, 6.6$  Hz, 1H), 3.77 (s, 3H), 2.19 (s, 3H), 2.07 (s, 3H), 1.45 (t,  $J = 6.3$  Hz, 1H) ppm;  $^{13}\text{C}$  NMR (100 MHz,  $\text{CDCl}_3$ )  $\delta$  157.6, 142.8, 142.2, 140.6, 139.0, 136.8, 136.4, 131.3, 129.9, 129.8, 128.7, 128.4, 128.3, 127.4, 115.4, 112.9, 65.7, 55.4, 21.3, 19.0 ppm; FTIR (neat)  $\nu$  2869, 1643, 1497, 1406, 1225, 1051, 887  $\text{cm}^{-1}$ ; HRMS (ESI)  $m/z$ : Calcd. For  $\text{C}_{24}\text{H}_{25}\text{O}_2^+$ : 345.1849, Found: 345.1856 ( $\text{M}+\text{H}^+$ ).

**(E)-2-(5-methoxy-2-methylphenyl)-3-(4-methoxyphenyl)-3-phenylprop-2-en-1-ol, 7b**

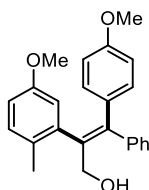

Colorless liquid, 62.8 mg, 87% yield, PE : EtOAc = 5:1.  $^1\text{H}$  NMR (400 MHz,  $\text{CDCl}_3$ )  $\delta$  7.39 – 7.28 (m, 5H), 6.96 (d,  $J = 8.4$  Hz, 1H), 6.84 – 6.81 (m, 2H), 6.68 (dd,  $J = 8.4, 2.8$  Hz, 1H), 6.57 – 6.53 (m, 2H), 4.39 (d,  $J = 12.0$  Hz, 1H), 4.29 (d,  $J = 12.0$  Hz, 1H), 3.77 (s, 3H), 3.67 (s, 3H), 2.05 (s, 3H), 1.50 (bs, 1H) ppm;  $^{13}\text{C}$  NMR (100 MHz,  $\text{CDCl}_3$ )  $\delta$  158.2, 157.6, 142.4, 142.2, 140.7, 136.3, 134.4, 131.4, 131.2, 129.9, 128.7, 128.4, 127.4, 115.3, 112.8, 112.8, 65.8, 55.4, 55.1, 19.0 ppm; FTIR (neat) 2886, 1740, 1382,

1316, 1232, 1087, 881  $\text{cm}^{-1}$ ; HRMS (ESI)  $m/z$ : Calcd. For  $\text{C}_{24}\text{H}_{25}\text{O}_3^+$ : 361.1798, Found: 361.1801 ( $\text{M}+\text{H}^+$ ).

**(E)-2-(5-methoxy-2-methylphenyl)-3-(4-nitrophenyl)-3-phenylprop-2-en-1-ol, 7c**

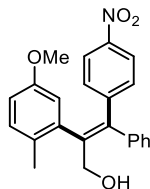

Colorless liquid, 54.6 mg, 73% yield, PE : EtOAc = 5:1.  $^1\text{H}$  NMR (400 MHz,  $\text{CDCl}_3$ )  $\delta$  7.91 – 7.87 (m, 2H), 7.43 – 7.31 (m, 5H), 7.11 – 7.07 (m, 2H), 6.99 (d,  $J$  = 8.4 Hz, 1H), 6.80 (d,  $J$  = 2.7 Hz, 1H), 6.72 (dd,  $J$  = 8.4, 2.7 Hz, 1H), 4.44 (dd,  $J$  = 12.2, 4.6 Hz, 1H), 4.36 (dd,  $J$  = 12.1, 5.5 Hz, 1H), 3.77 (s, 3H), 2.08 (s, 3H), 1.52 (t,  $J$  = 5.6 Hz, 1H) ppm;  $^{13}\text{C}$  NMR (100 MHz,  $\text{CDCl}_3$ )  $\delta$  157.8, 148.9, 146.3, 140.9, 140.5, 140.4, 139.3, 131.7, 130.7, 129.9, 128.8, 128.2, 128.1, 122.9, 115.5, 113.3, 65.3, 55.5, 18.9 ppm; FTIR (neat) 2920, 2320, 2079, 1644, 1510, 1344, 1053, 858 ppm; HRMS (ESI)  $m/z$ : Calcd. For  $\text{C}_{23}\text{H}_{22}\text{NO}_4^+$ : 376.1543, Found: 376.1544 ( $\text{M}+\text{H}^+$ ).

## 8. Crystal structural data

### 8.1 Crystal structural data 2g

Single crystal of compound **2g** was obtained by recrystallization from ethyl acetate and petroleum ether. The structure was shown in *Figure S3*. X-ray diffractive data and the refinement were shown in *Table S4*.

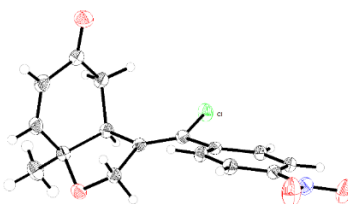

**Figure S3** X-ray single crystal structure of **2g**. Displacement ellipsoids are drawn at the 25% probability level.

**Table S4** Crystal data and structure refinement for substrate **2g**

|                   | <b>2g</b>                                                   |
|-------------------|-------------------------------------------------------------|
| Empirical formula | $\text{C}_{32}\text{H}_{28}\text{Cl}_2\text{N}_2\text{O}_8$ |
| Formula weight    | 639.46                                                      |
| Temperature       | 300.0 K                                                     |

|                                   |                                                                                                                                                           |
|-----------------------------------|-----------------------------------------------------------------------------------------------------------------------------------------------------------|
| Wavelength                        | 0.71073 Å                                                                                                                                                 |
| Crystal system                    | triclinic                                                                                                                                                 |
| space group                       | P-1                                                                                                                                                       |
| Unit cell dimensions              | a = 8.7268 (3) Å,<br>b = 8.8198(3) Å,<br>c = 9.8887(3) Å,<br>$\alpha = 94.7650(10)^\circ$<br>$\beta = 107.4040(10)^\circ$<br>$\gamma = 93.8140(10)^\circ$ |
| Volume                            | 720.42(4) Å <sup>3</sup>                                                                                                                                  |
| Z, Calculated density             | 1, 1.474 Mg/m <sup>3</sup>                                                                                                                                |
| Absorption coefficient            | 0.283 mm <sup>-1</sup>                                                                                                                                    |
| F(000)                            | 332.0                                                                                                                                                     |
| Crystal size                      | 0.26 × 0.24 × 0.2 mm <sup>3</sup>                                                                                                                         |
| Theta range for data collection   | 4.342 to 55.012 °                                                                                                                                         |
| Limiting indices                  | -11 ≤ h ≤ 11,<br>-11 ≤ k ≤ 11,<br>-12 ≤ l ≤ 12                                                                                                            |
| Reflections collected / unique    | 17022 / 3325 [R <sub>int</sub> = 0.0295, R <sub>sigma</sub> = 0.0228]                                                                                     |
| Completeness to theta = 29.00     | 100 %                                                                                                                                                     |
| Data / restraints / parameters    | 3325/0/200                                                                                                                                                |
| Goodness-of-fit on F <sup>2</sup> | 1.059                                                                                                                                                     |
| Final R indices [I > 2σ(I)]       | R <sub>1</sub> = 0.0380, wR <sub>2</sub> = 0.0962                                                                                                         |
| R indices (all data)              | R <sub>1</sub> = 0.0437, wR <sub>2</sub> = 0.1010                                                                                                         |
| Largest diff. peak and hole       | 0.21 and -0.34e·Å <sup>-3</sup>                                                                                                                           |

CIF files of **2g** can be obtained from the Cambridge Crystallographic Data Centre using deposition numbers 2083884. Copies of the data can be obtained, free of charge, on application to the CCDC, 12 Union Road, Cambridge CB2 1EZ, UK [e-mail: [deposit@ccdc.cam.ac.uk](mailto:deposit@ccdc.cam.ac.uk), fax: +44 (1223) 336 033].

## 8.2 Crystal structural data **3g**

Single crystal of compound **3g** was obtained by recrystallization from ethyl acetate and petroleum ether. The structure was shown in *Figure S4*. X-ray diffractive data and the refinement were shown in *Table S5*.

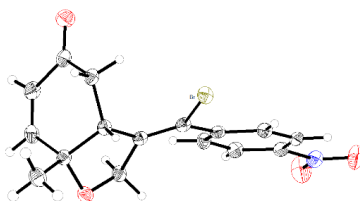

**Figure S4** X-ray single crystal structure of **3g**. Displacement ellipsoids are drawn at the 50% probability level.

**Table S5** Crystal data and structure refinement for substrate **3g**

| <b>3g</b>                         |                                                                                                              |
|-----------------------------------|--------------------------------------------------------------------------------------------------------------|
| Empirical formula                 | C <sub>32</sub> H <sub>28</sub> Br <sub>2</sub> N <sub>2</sub> O <sub>8</sub>                                |
| Formula weight                    | 728.38                                                                                                       |
| Temperature                       | 296.15 K                                                                                                     |
| Wavelength                        | 0.71073 Å                                                                                                    |
| Crystal system                    | triclinic                                                                                                    |
| space group                       | P-1                                                                                                          |
| Unit cell dimensions              | a = 8.708(2) Å,<br>b = 8.801(2) Å,<br>c = 9.811(3) Å,<br>α = 93.879(4)°<br>β = 106.094(3)°<br>γ = 92.492(3)° |
| Volume                            | 719.3(3) Å <sup>3</sup>                                                                                      |
| Z, Calculated density             | 1, 1.681 Mg/m <sup>3</sup>                                                                                   |
| Absorption coefficient            | 2.876 mm <sup>-1</sup>                                                                                       |
| F(000)                            | 368.0                                                                                                        |
| Crystal size                      | 0.26 × 0.24 × 0.2 mm <sup>3</sup>                                                                            |
| Theta range for data collection   | 4.336 to 51.124 °                                                                                            |
| Limiting indices                  | -10 ≤ h ≤ 10,<br>-10 ≤ k ≤ 10,<br>-11 ≤ l ≤ 11                                                               |
| Reflections collected / unique    | 7121/2668 [R <sub>int</sub> = 0.0255, R <sub>sigma</sub> = 0.0293]                                           |
| Completeness to theta = 29.00     | 100 %                                                                                                        |
| Data / restraints / parameters    | 2668/0/200                                                                                                   |
| Goodness-of-fit on F <sup>2</sup> | 1.045                                                                                                        |
| Final R indices [I > 2σ(I)]       | R <sub>1</sub> = 0.0265, wR <sub>2</sub> = 0.0692                                                            |
| R indices (all data)              | R <sub>1</sub> = 0.0317, wR <sub>2</sub> = 0.0715                                                            |
| Largest diff. peak and hole       | 0.69/-0.52 e·Å <sup>-3</sup>                                                                                 |

CIF files of **3g** can be obtained from the Cambridge Crystallographic Data Centre using deposition numbers 2105850. Copies of the data can be obtained, free of charge, on application to the CCDC, 12 Union Road, Cambridge CB2 1EZ, UK [e-mail: [deposit@ccdc.cam.ac.uk](mailto:deposit@ccdc.cam.ac.uk), fax: +44 (1223) 336 033].

### 8.3 Crystal structural data **4e**

Single crystal of compound **4e** was obtained by recrystallization from ethyl acetate and petroleum ether. The structure was shown in *Figure S5*. X-ray diffractive data and the refinement were shown in *Table S6*.

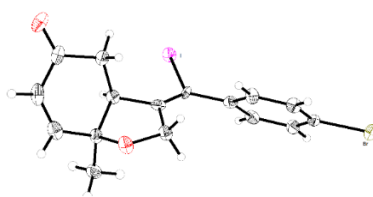

**Figure S5** X-ray single crystal structure of **4e**. Displacement ellipsoids are drawn at the 50% probability level.

**Table S6** Crystal data and structure refinement for substrate **4e**

|                                 | <b>4e</b>                                                                                    |
|---------------------------------|----------------------------------------------------------------------------------------------|
| Empirical formula               | C <sub>128</sub> H <sub>112</sub> Br <sub>8</sub> I <sub>8</sub> O <sub>16</sub>             |
| Formula weight                  | 3560.65                                                                                      |
| Temperature                     | 296.15K                                                                                      |
| Wavelength                      | 0.71073 Å                                                                                    |
| Crystal system                  | orthorhombic                                                                                 |
| space group                     | Pbca                                                                                         |
| Unit cell dimensions            | a = 10.6516(15) Å,<br>b = 8.2155(12) Å,<br>c = 34.902(5) Å,<br>α = 90°<br>β = 90°<br>γ = 90° |
| Volume                          | 3054.2(8) Å <sup>3</sup>                                                                     |
| Z, Calculated density           | 1, 1.936 Mg/m <sup>3</sup>                                                                   |
| Absorption coefficient          | 4.712 mm <sup>-1</sup>                                                                       |
| F(000)                          | 1712.0                                                                                       |
| Crystal size                    | 0.26 × 0.22 × 0.2 mm <sup>3</sup>                                                            |
| Theta range for data collection | 4.48 to 50.924 °                                                                             |



|                                      |                                                                       |
|--------------------------------------|-----------------------------------------------------------------------|
| Limiting indices                     | $-12 \leq h \leq 12,$<br>$-9 \leq k \leq 9,$<br>$-41 \leq l \leq 33$  |
| Reflections collected / unique       | 17202/2691 [ $R_{\text{int}} = 0.0272,$ $R_{\text{sigma}} = 0.0218$ ] |
| Completeness to theta = 29.00        | 96%                                                                   |
| Data / restraints / parameters       | 2691/0/182                                                            |
| Goodness-of-fit on $F^2$             | 1.239                                                                 |
| Final R indices [ $I > 2\sigma(I)$ ] | $R_1 = 0.0356,$ $wR_2 = 0.0760$                                       |
| R indices (all data)                 | $R_1 = 0.0416,$ $wR_2 = 0.0777$                                       |
| Largest diff. peak and hole          | 0.95/-1.01 $e \cdot \text{\AA}^{-3}$                                  |

CIF files of **4e** can be obtained from the Cambridge Crystallographic Data Centre using deposition numbers 2111667. Copies of the data can be obtained, free of charge, on application to the CCDC, 12 Union Road, Cambridge CB2 1EZ, UK [e-mail: [deposit@ccdc.cam.ac.uk](mailto:deposit@ccdc.cam.ac.uk), fax: +44 (1223) 336 033].

#### 8.4 Crystal structural data **5e**

Single crystal of compound **5e** was obtained by recrystallization from ethyl acetate and petroleum ether. The structures were shown in *Figure S6*. X-ray diffractive data and the refinement were shown in *Table S7*.

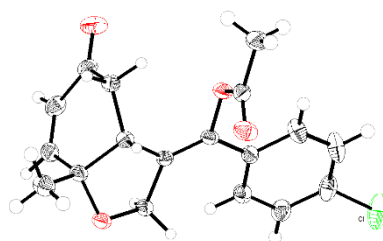

**Figure S6** X-ray single crystal structure of **5e**. Displacement ellipsoids are drawn at the 25% probability level.

**Table S7** Crystal data and structure refinement for substrate **5e**

|                   | <b>5e</b>                  |
|-------------------|----------------------------|
| Empirical formula | $C_{144}H_{136}Cl_8O_{36}$ |
| Formula weight    | 2662.12                    |
| Temperature       | 300.0 K                    |
| Wavelength        | 0.71073 $\text{\AA}$       |

|                                   |                                                                                                                                      |
|-----------------------------------|--------------------------------------------------------------------------------------------------------------------------------------|
| Crystal system                    | monoclinic                                                                                                                           |
| space group                       | C2/c                                                                                                                                 |
| Unit cell dimensions              | a = 32.6039(12) Å,<br>b = 7.5419(3) Å,<br>c = 13.9954(4) Å,<br>$\alpha = 90^\circ$<br>$\beta = 110(10)^\circ$<br>$\gamma = 90^\circ$ |
| Volume                            | 3222.6(2) Å <sup>3</sup>                                                                                                             |
| Z, Calculated density             | 1, 1.372 Mg/m <sup>3</sup>                                                                                                           |
| Absorption coefficient            | 0.255 mm <sup>-1</sup>                                                                                                               |
| F(000)                            | 1392.0                                                                                                                               |
| Crystal size                      | 0.26 × 0.24 × 0.2 mm <sup>3</sup>                                                                                                    |
| Theta range for data collection   | 5.564 to 54.99 °                                                                                                                     |
| Limiting indices                  | -42 ≤ h ≤ 41,<br>-9 ≤ k ≤ 9,<br>-18 ≤ l ≤ 18                                                                                         |
| Reflections collected / unique    | 18713/3690 [R <sub>int</sub> = 0.0613, R <sub>sigma</sub> = 0.0409]                                                                  |
| Completeness to theta = 29.00     | 100%                                                                                                                                 |
| Data / restraints / parameters    | 3690/0/210                                                                                                                           |
| Goodness-of-fit on F <sup>2</sup> | 1.025                                                                                                                                |
| Final R indices [I > 2σ(I)]       | R <sub>1</sub> = 0.0514, wR <sub>2</sub> = 0.1110                                                                                    |
| R indices (all data)              | R <sub>1</sub> = 0.0914, wR <sub>2</sub> = 0.1350                                                                                    |
| Largest diff. peak and hole       | 0.27/-0.32 e·Å <sup>-3</sup>                                                                                                         |

CIF files of **5e** can be obtained from the Cambridge Crystallographic Data Centre using deposition numbers 2155999. Copies of the data can be obtained, free of charge, on application to the CCDC, 12 Union Road, Cambridge CB2 1EZ, UK [e-mail: [deposit@ccdc.cam.ac.uk](mailto:deposit@ccdc.cam.ac.uk), fax: +44 (1223) 336 033].

## 9. References

- (1) Mallick, R. K.; Vangara, S.; Kommu, N.; Guntreddi, T. Sahoo, A. K.; Lewis acid-driven Meyer-Schuster-type rearrangement of yne-dienone. *J. Org. Chem.* **2021**, *86*, 7059.
- (2) Singh, A.; Shukla, R. K.; Volla, C. M. R. Palladium-catalyzed highly diastereo-

- selective cascade dihalogenation of alkyne-tethered cyclohexadienones via Umpolung of palladium enolate. *Chem. Commun.* **2019**, 55, 13442.
- (3) Tan, Y. X.; Tang, X. Q.; Liu, P.; Kong, D. S.; Chen, Y. L.; Tian, P.; Lin, G. Q. CuH-Catalyzed asymmetric intramolecular reductive coupling of zlnenes to enones. *Org. Lett.* **2018**, 20, 248.
- (4) Nair, A. M., Halder I., Sharma R., and Volla, C. M. R. Water Mediated rearrangement of alkynyl cyclohexadienones: access to meta-alkenylated phenols. *Org. Lett.* **2021**, 23, 1840.
- (5) Jiang, Y. Q.; Li, P. F.; Wang, J. J.; Zhao, J.; Li, Y.; Zhang, Y. W.; Chang, J. B.; Liu, B. X.; Li, X. W.; Rh(III)-catalyzed coupling of acrylic acids and ynones via olefinic C–H activation and Michael addition. *Org. Lett.* **2020**, 22, 438.
- (6) Qin, M. M.; Wu, Z. B.; Zhang, J. R.; Xing, X. Y.; Zhu, L. N.; Zhong, Y. Q.; Guo, Y. R.; Zhao, G. J.; The aggregation-induced emission of Methyl-bis-(4-triphenylvinylbenzyl)-amine in solution with torsional and locked stacking effects. *J. Mol. Liq.* **2021**, 339, 116626.

## 10. NMR spectra of new compounds

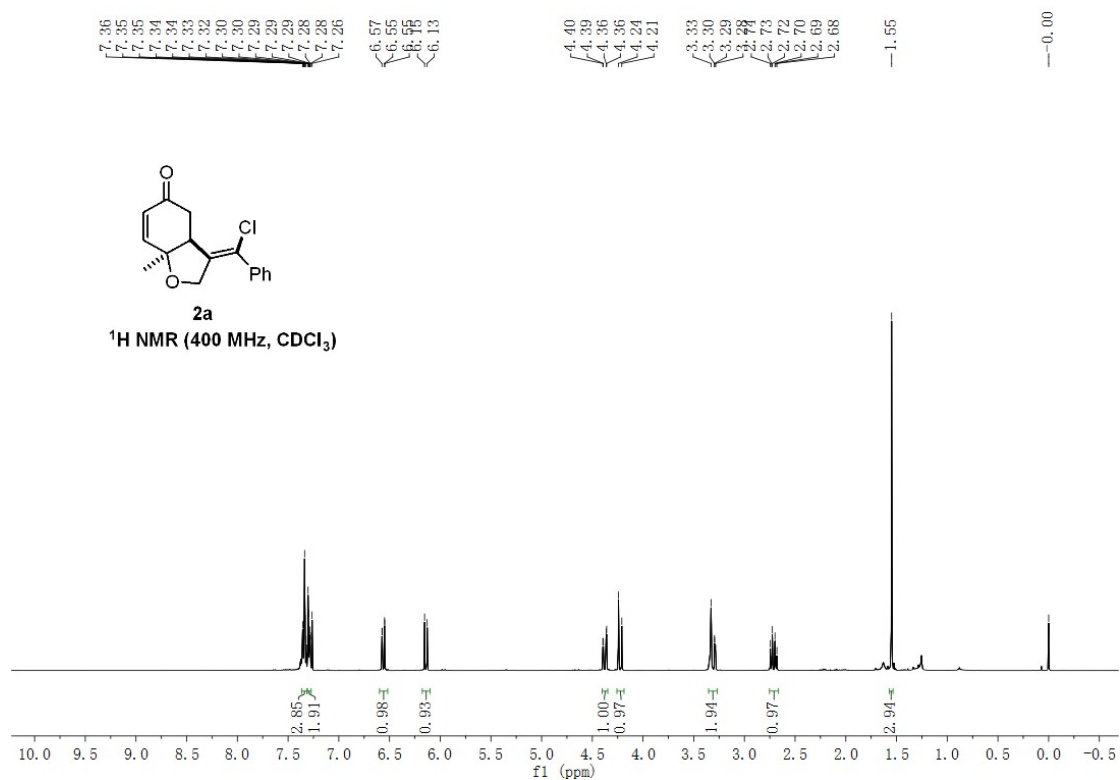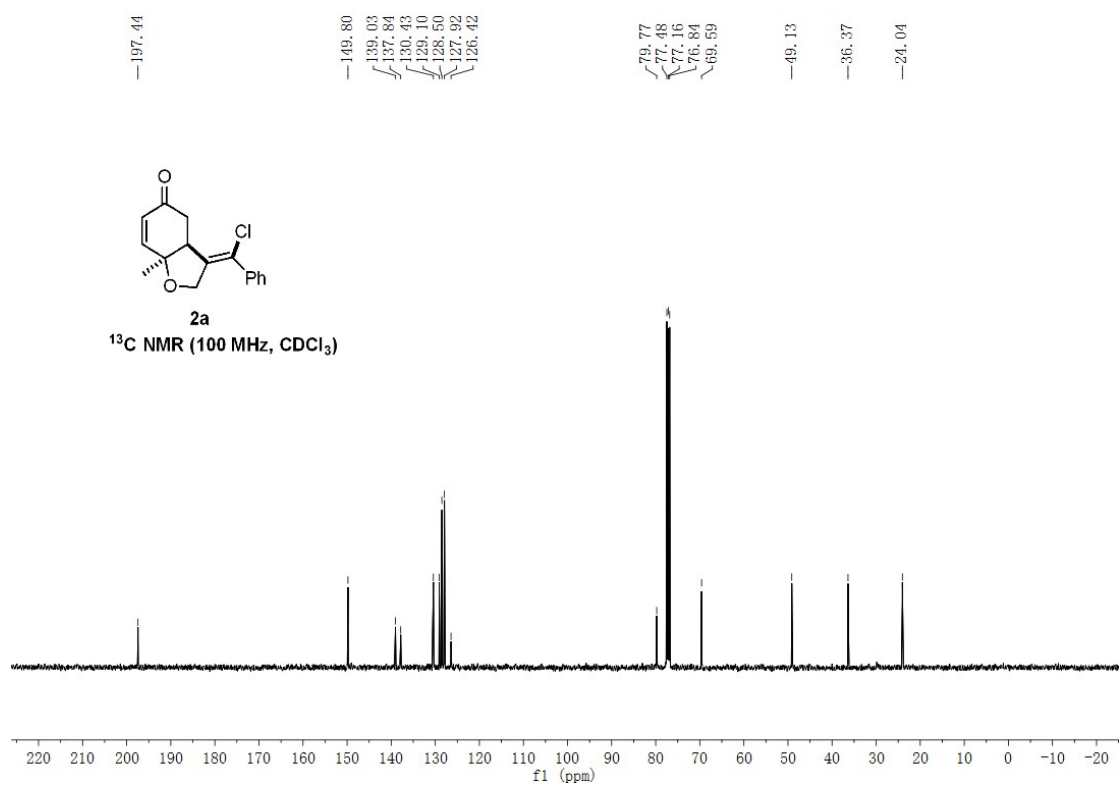

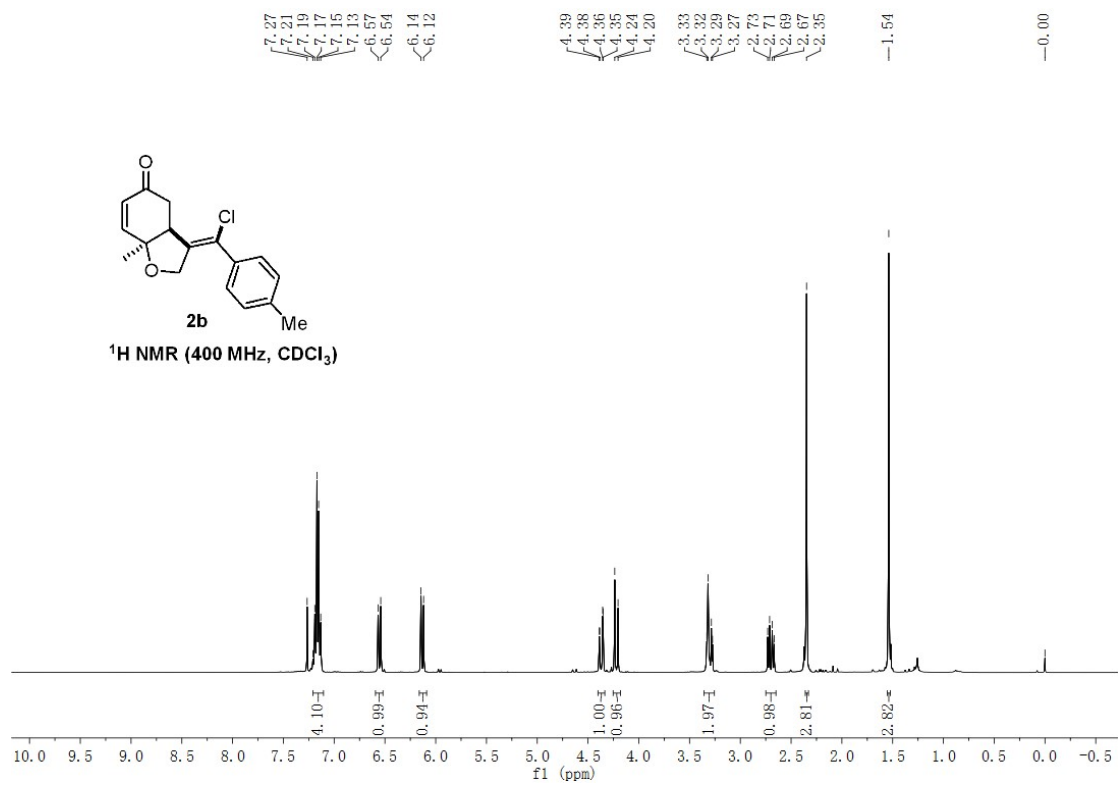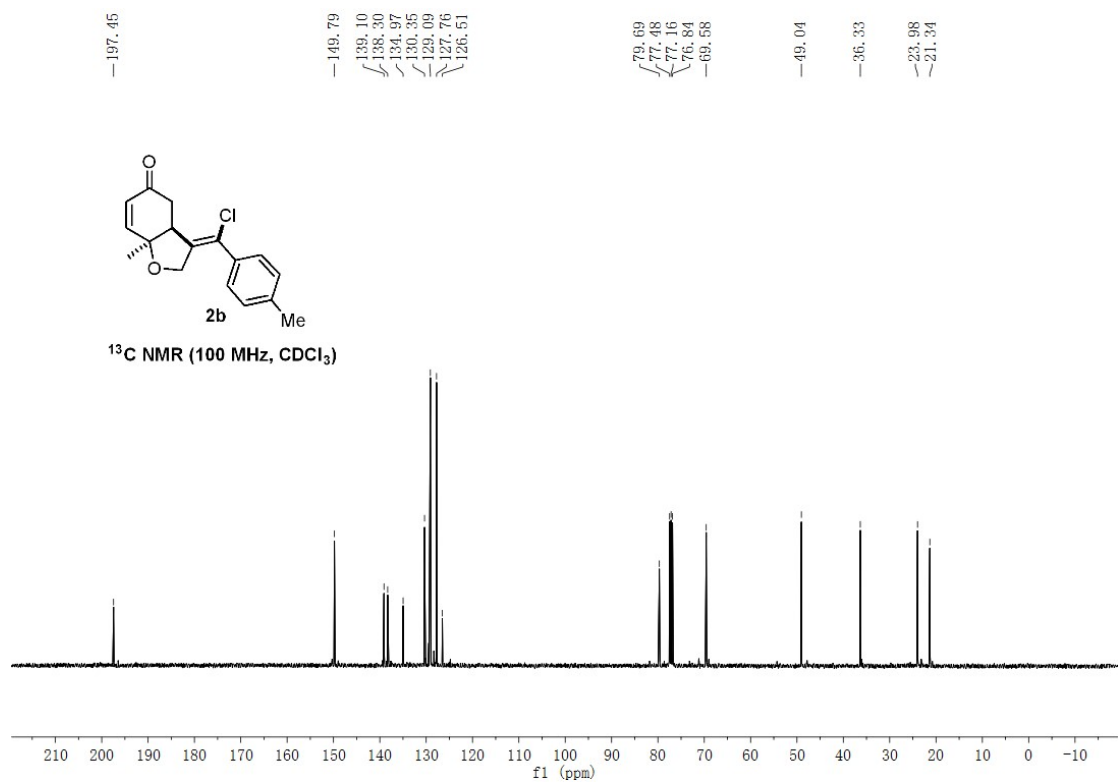

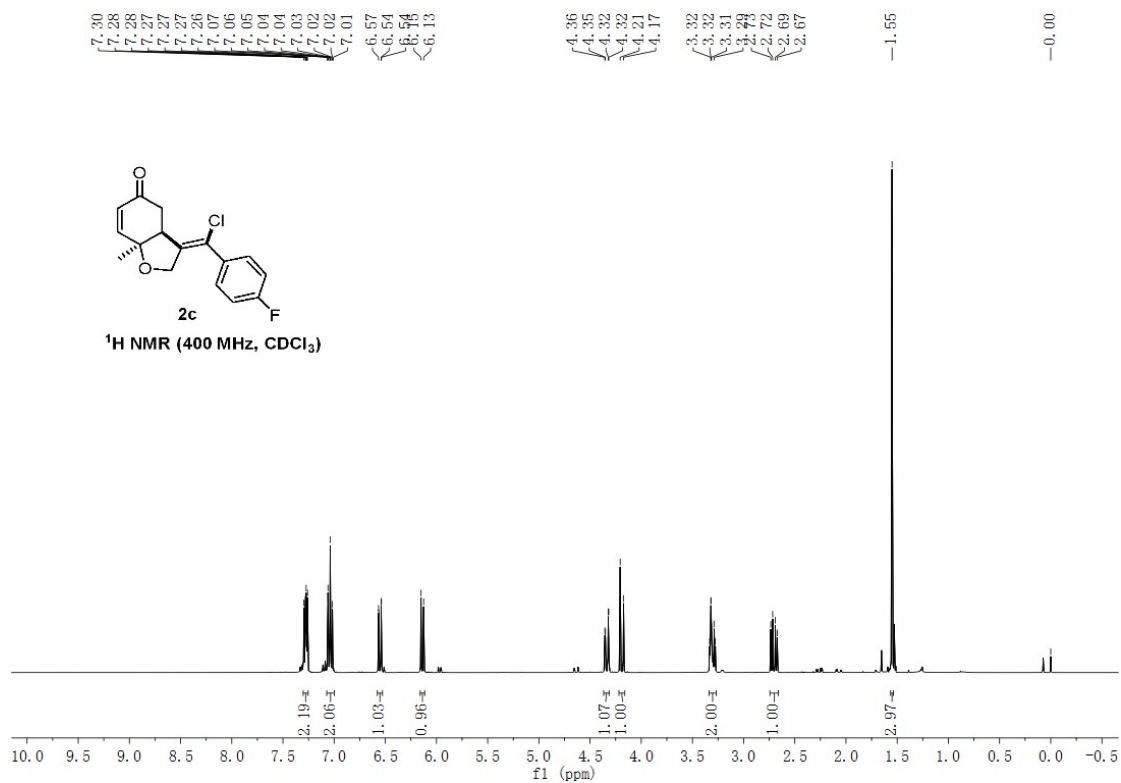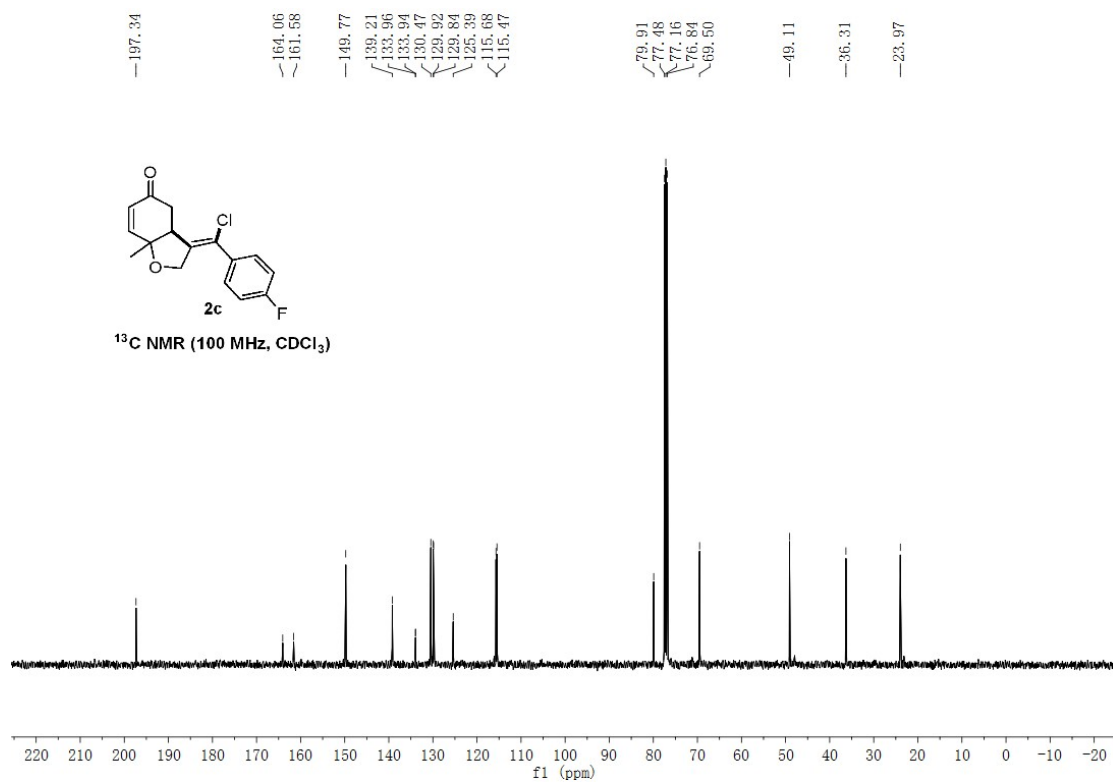

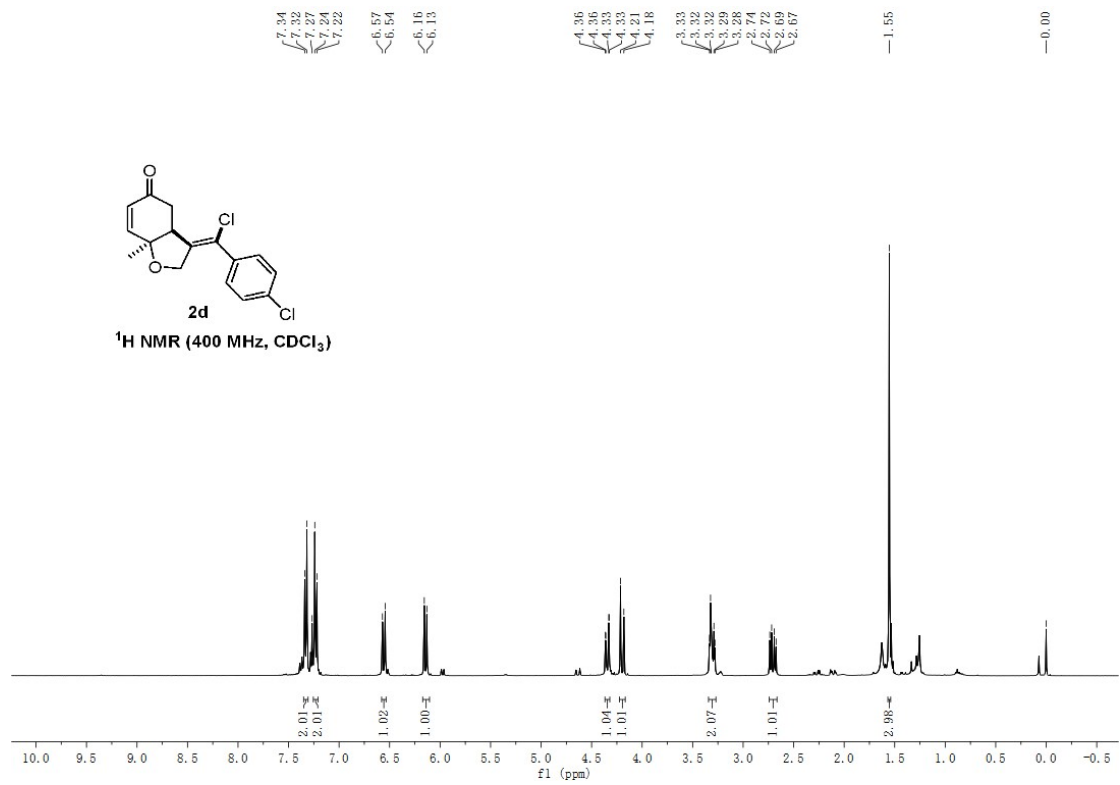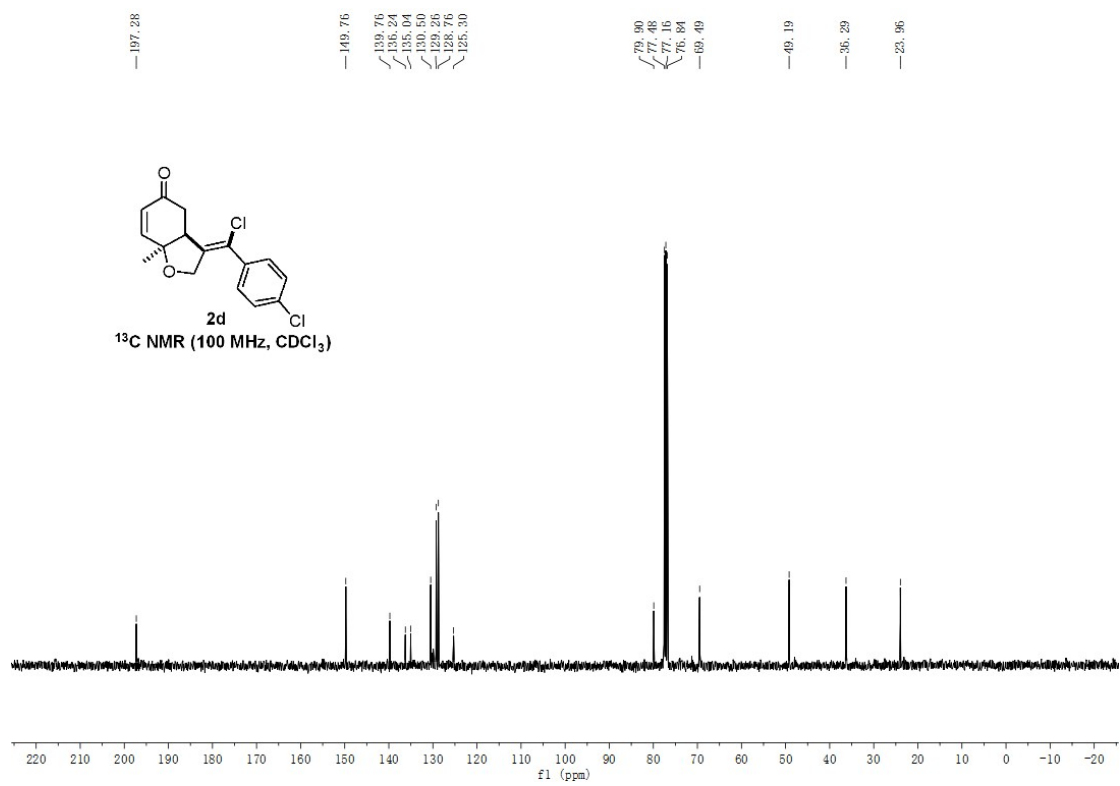

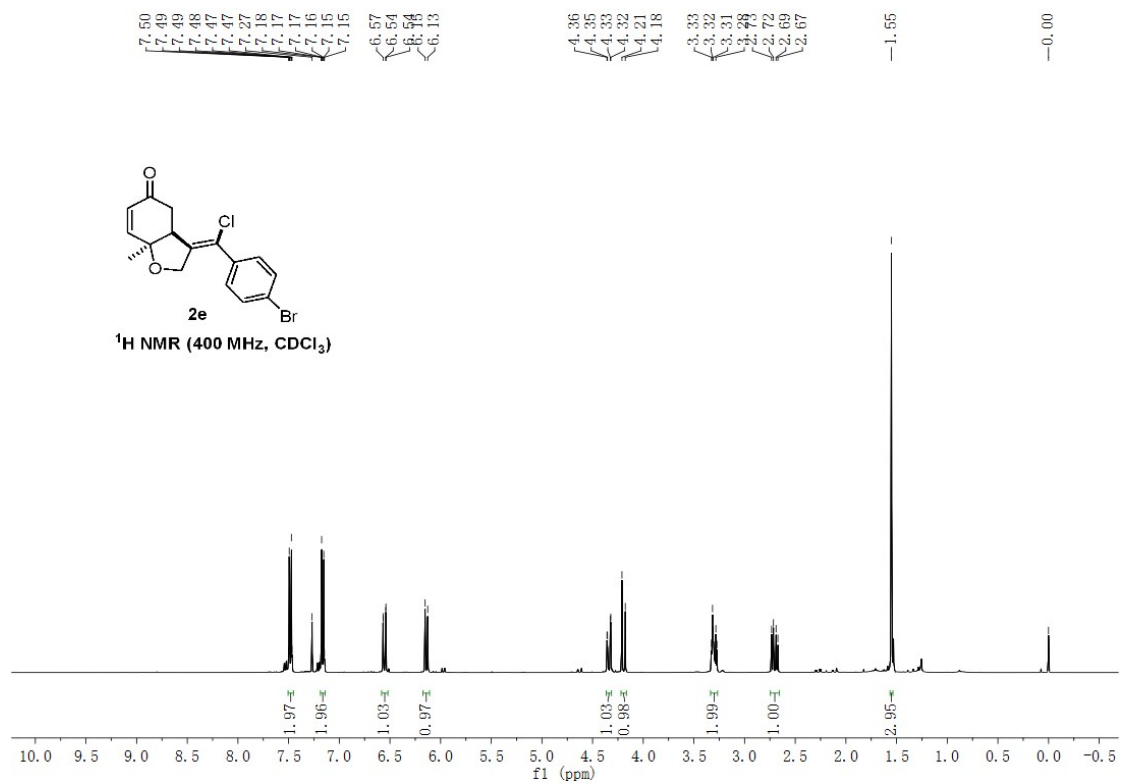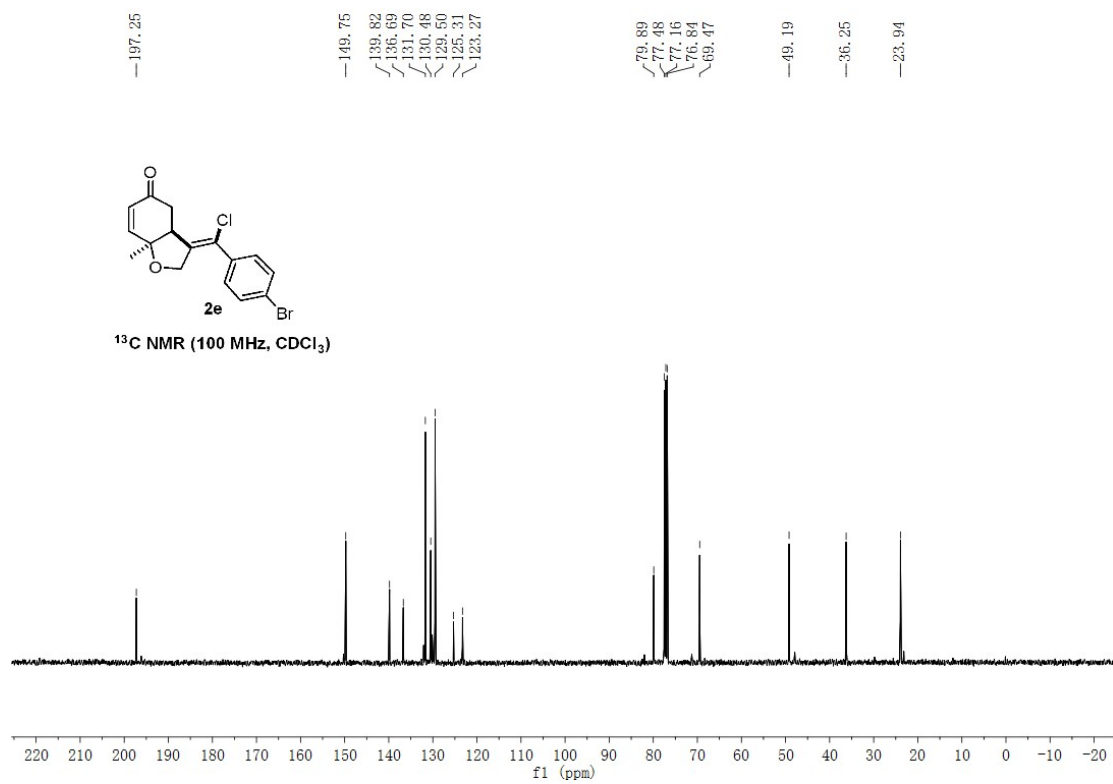



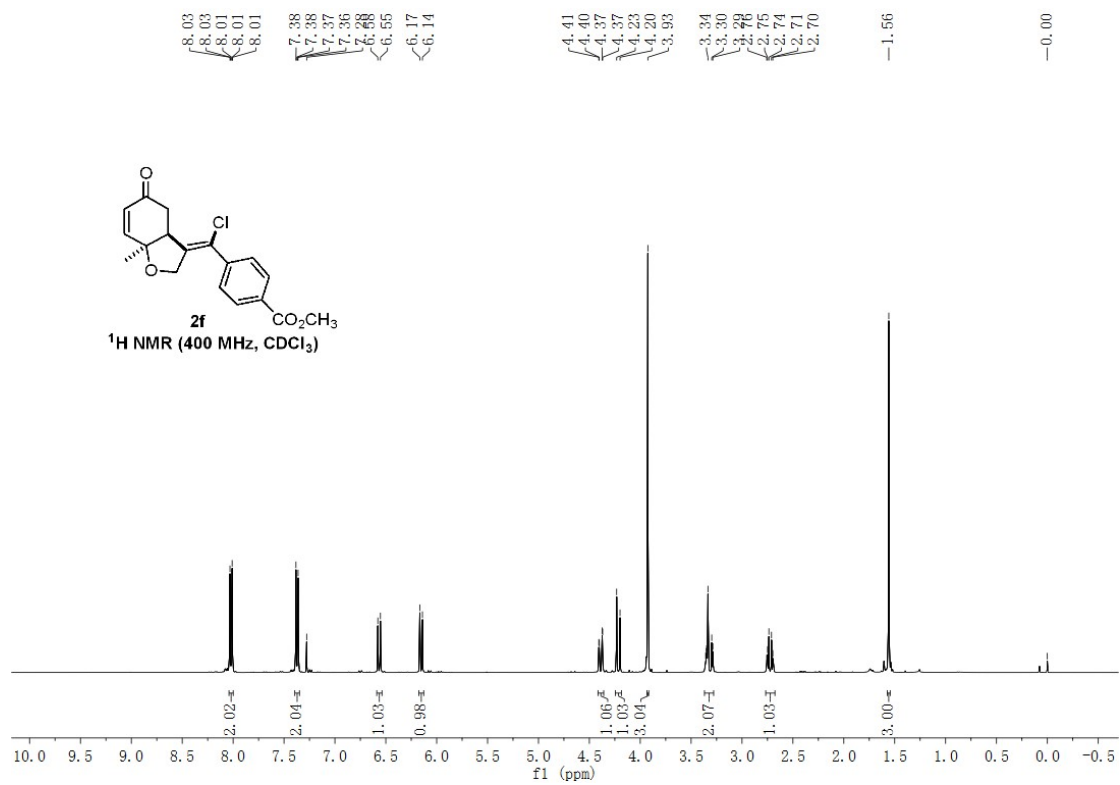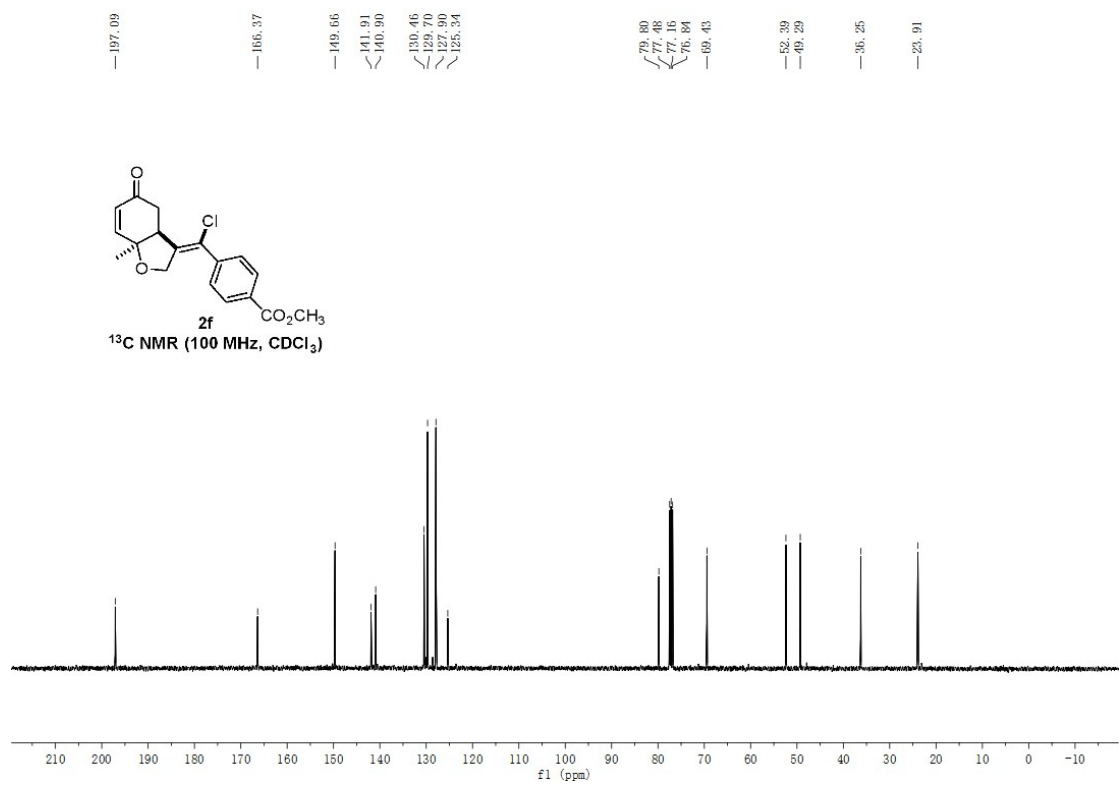

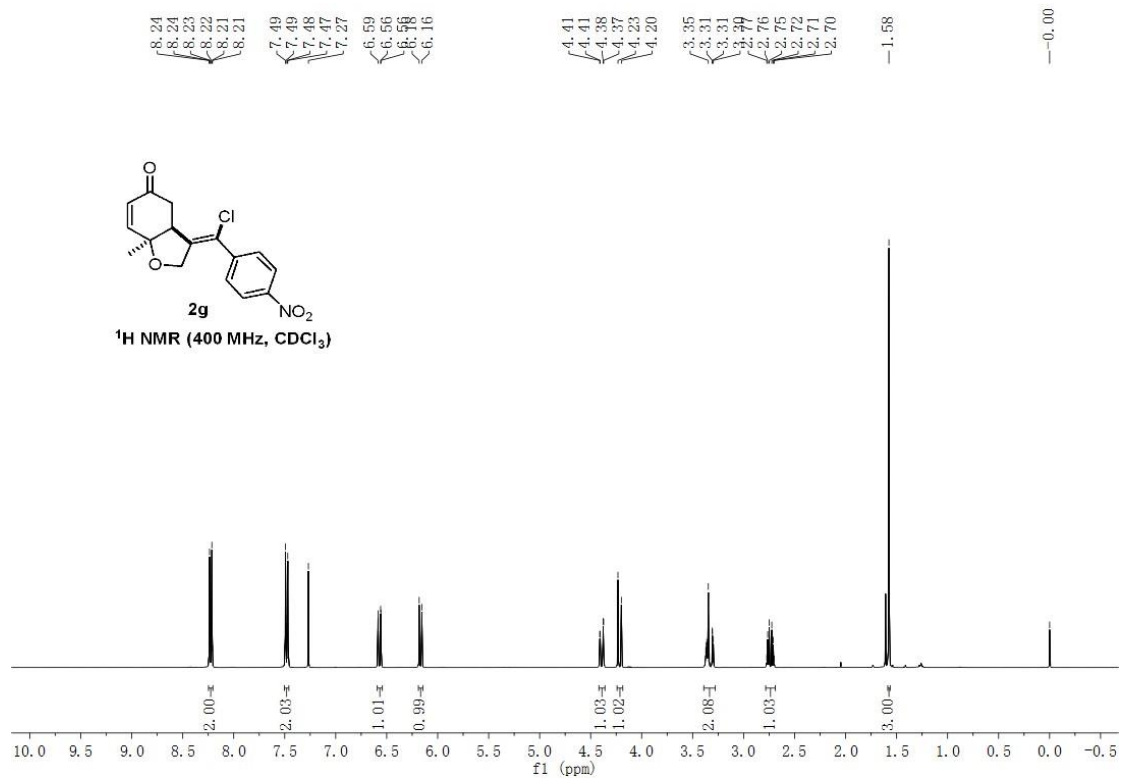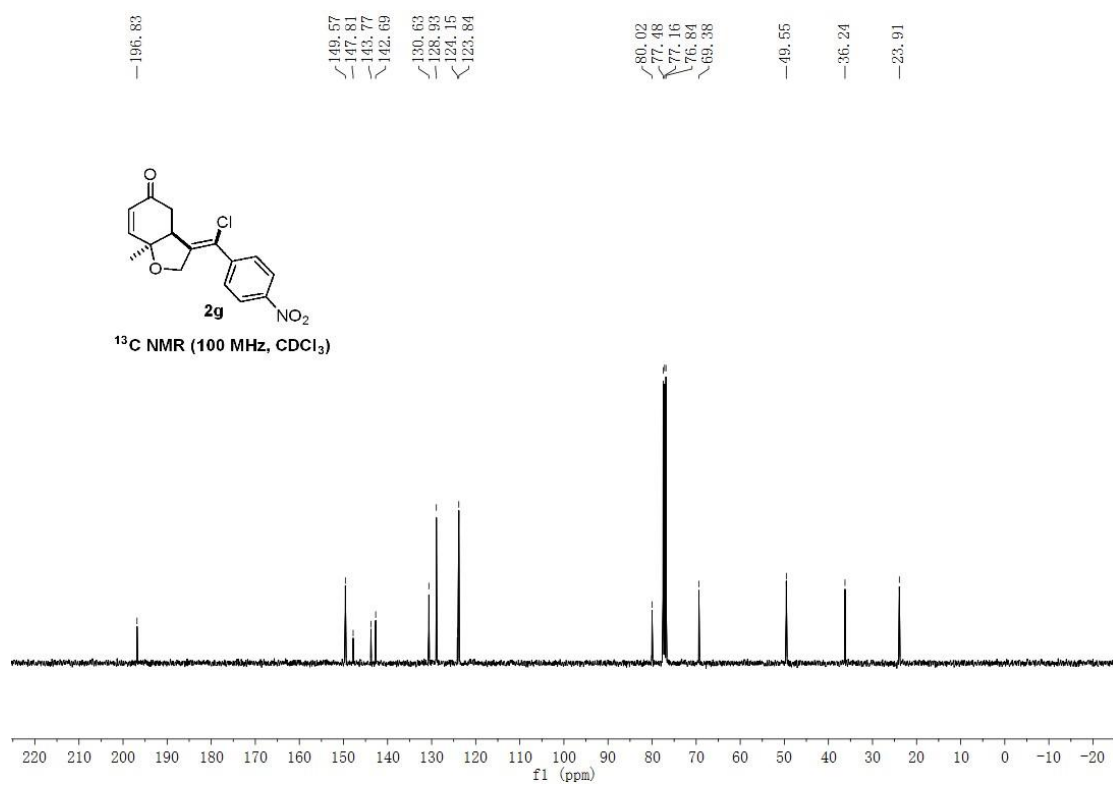

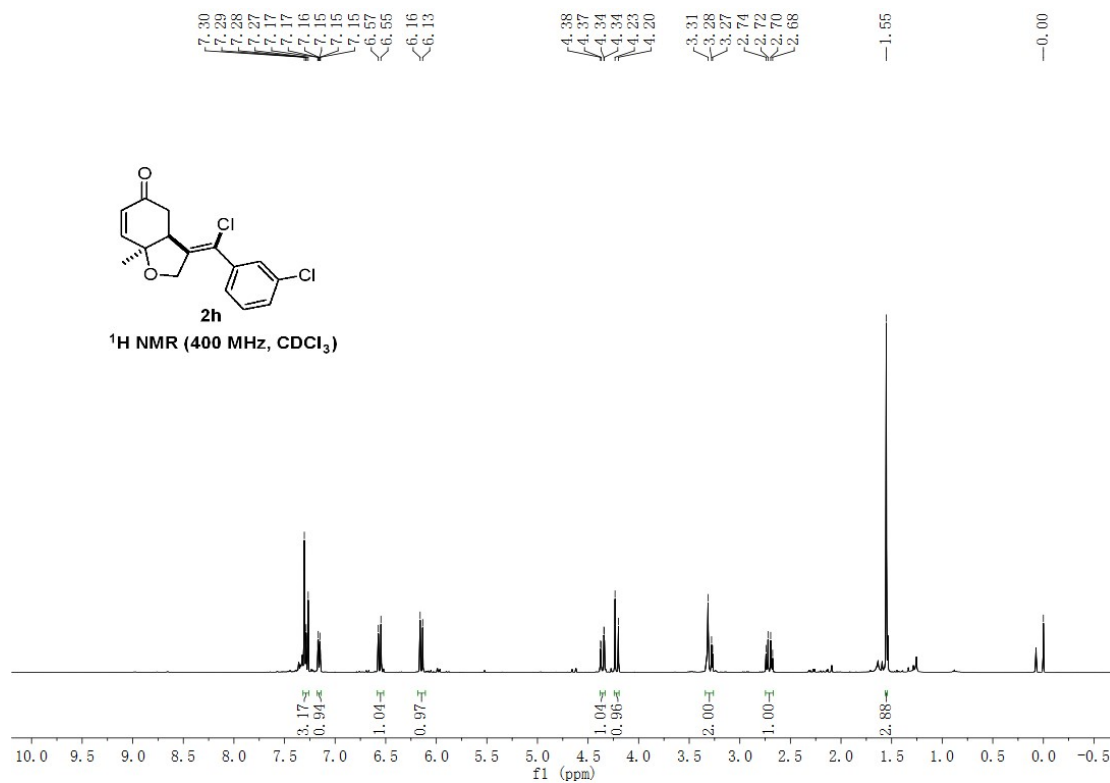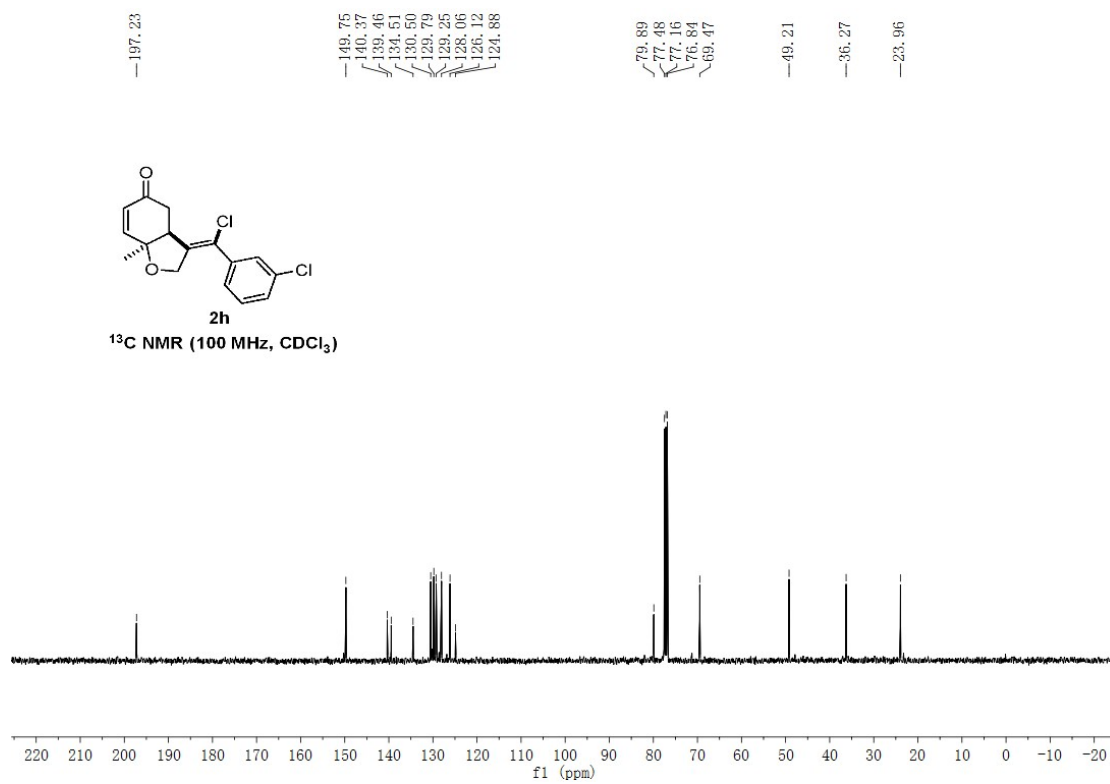

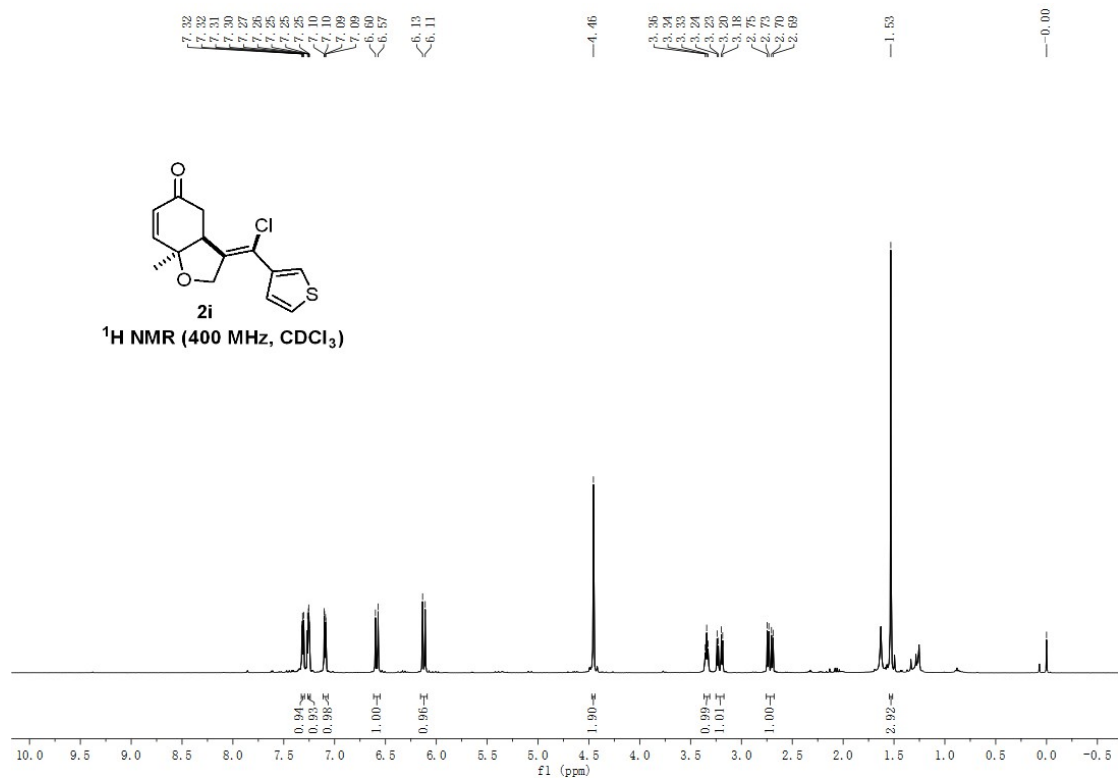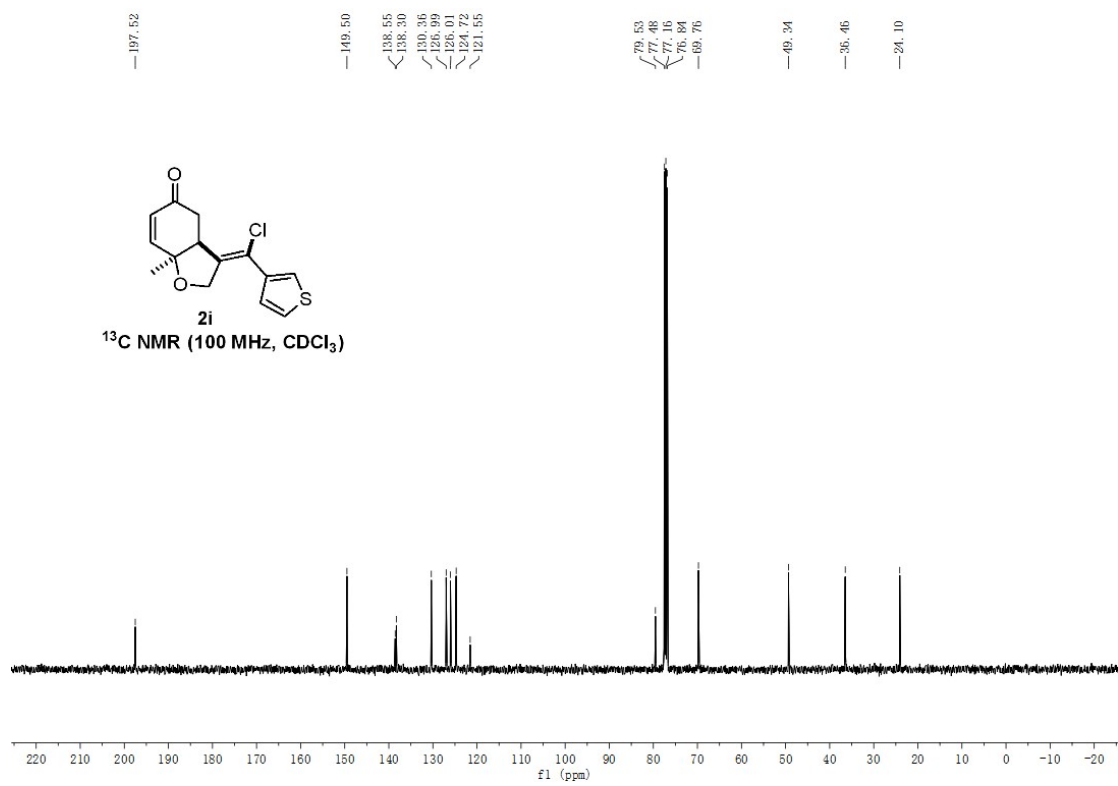

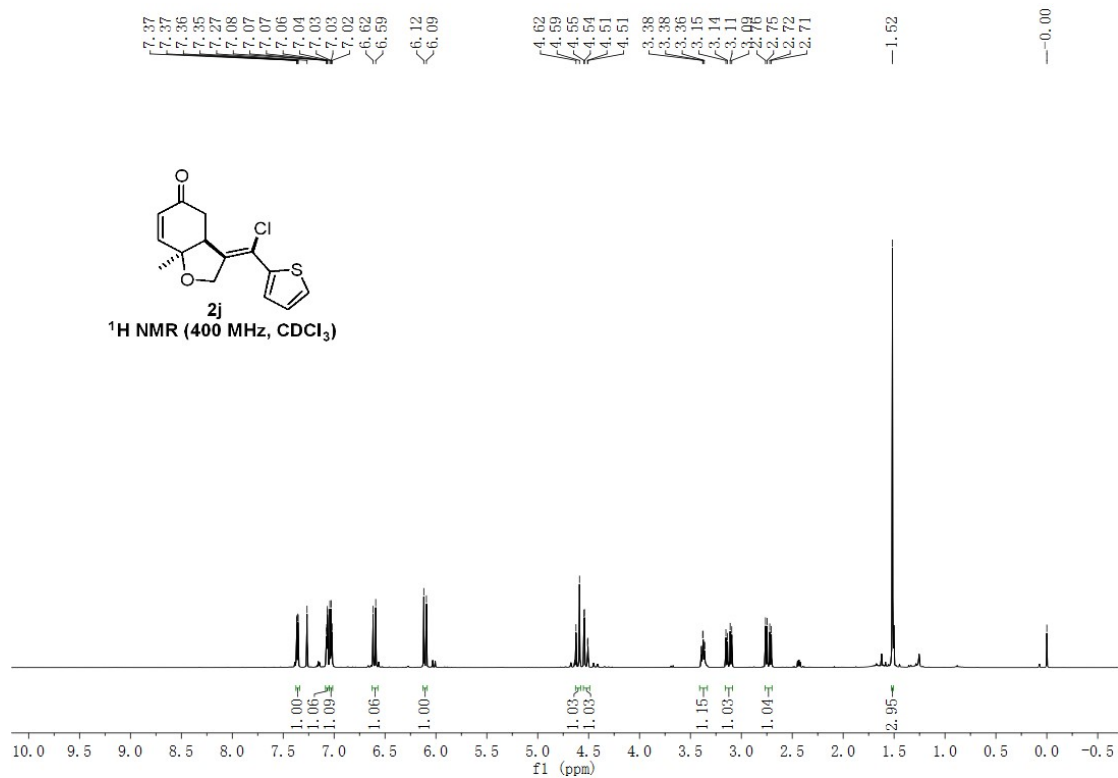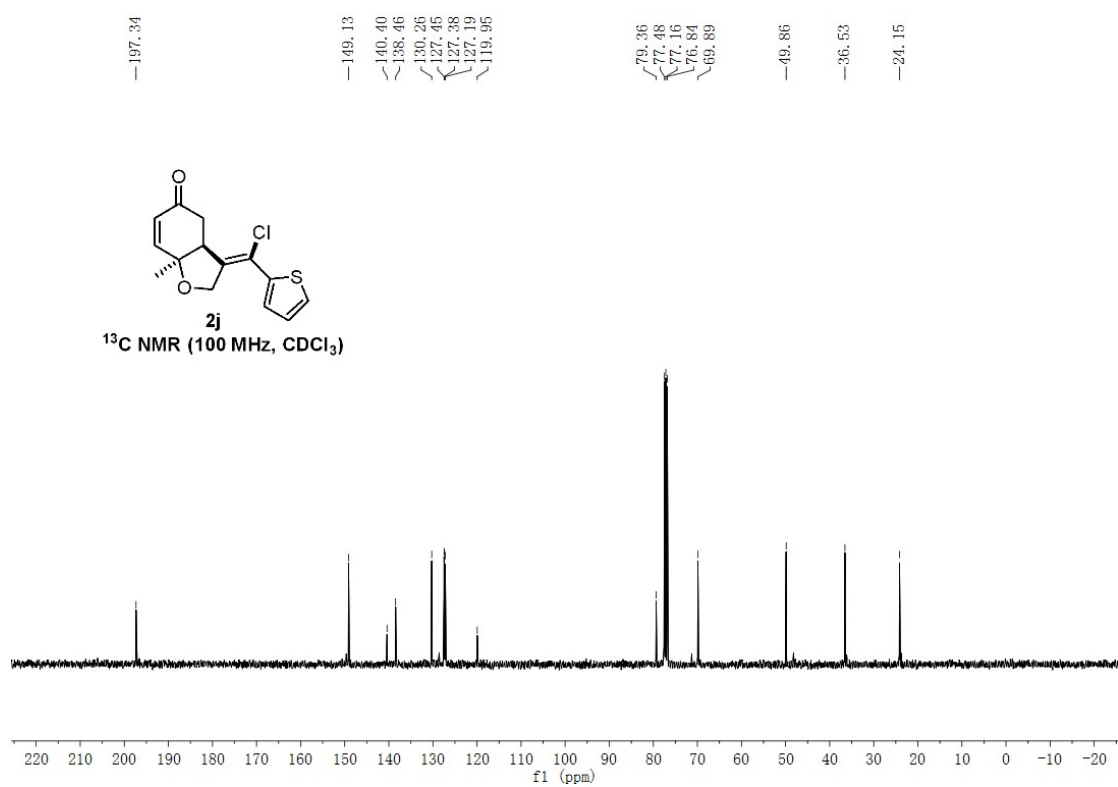

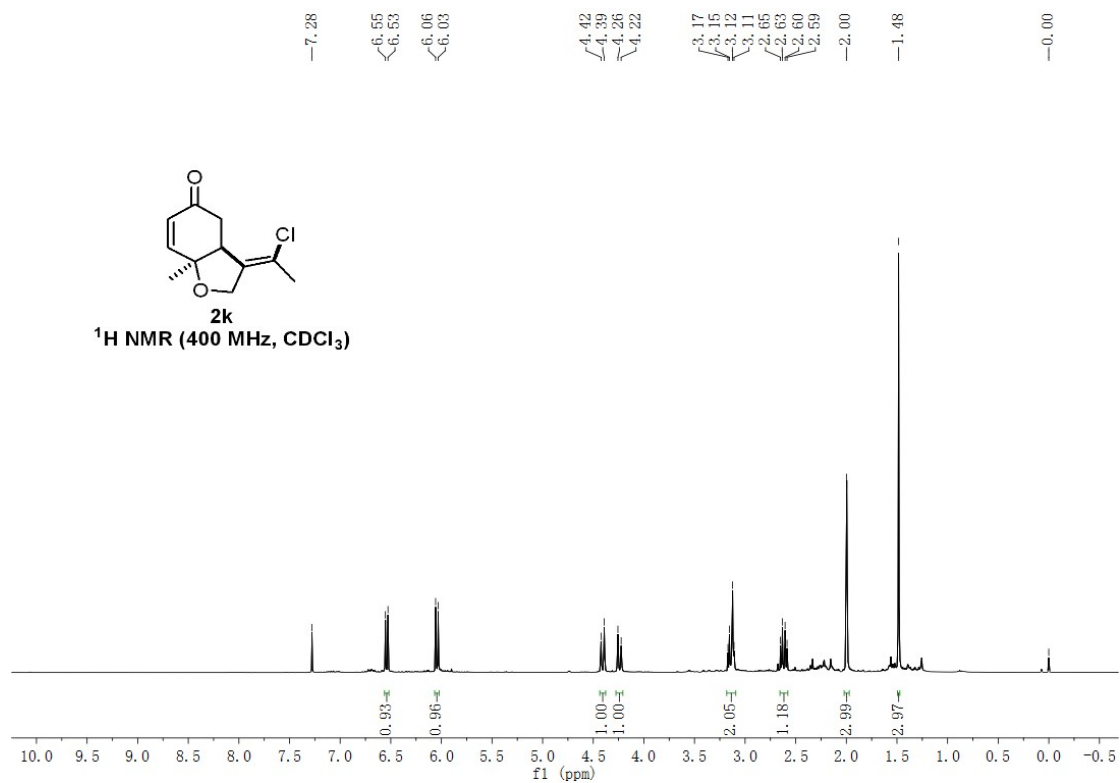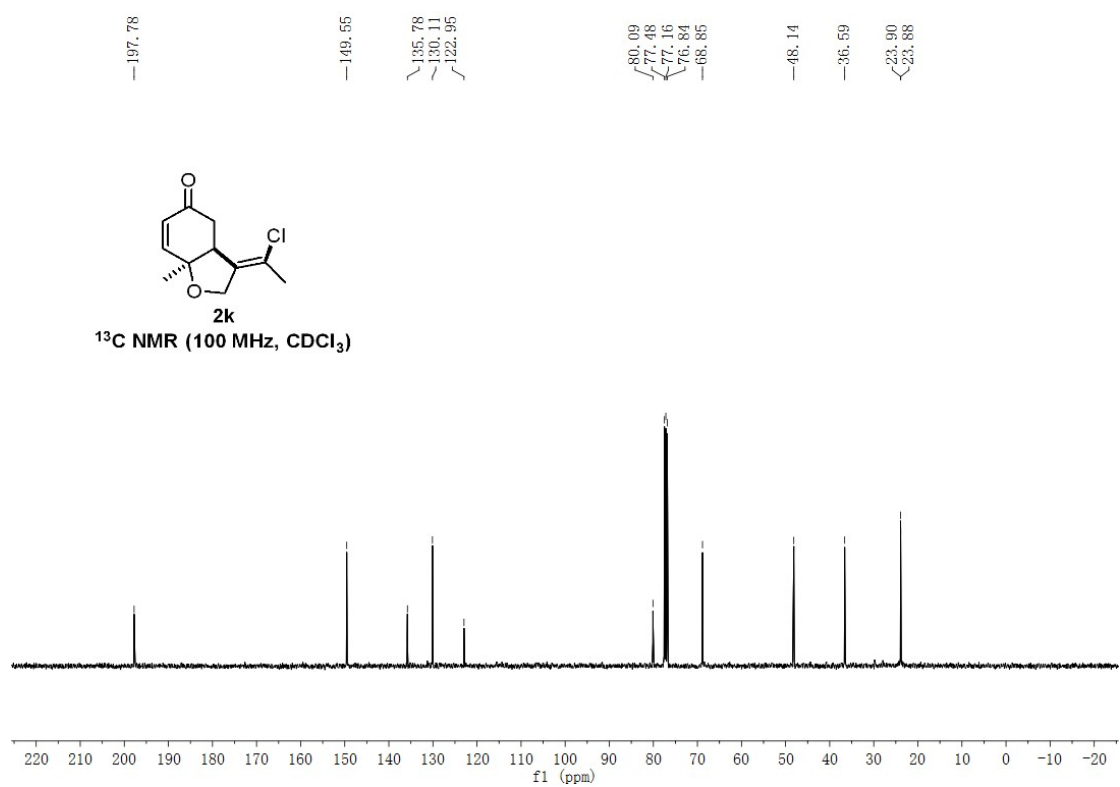



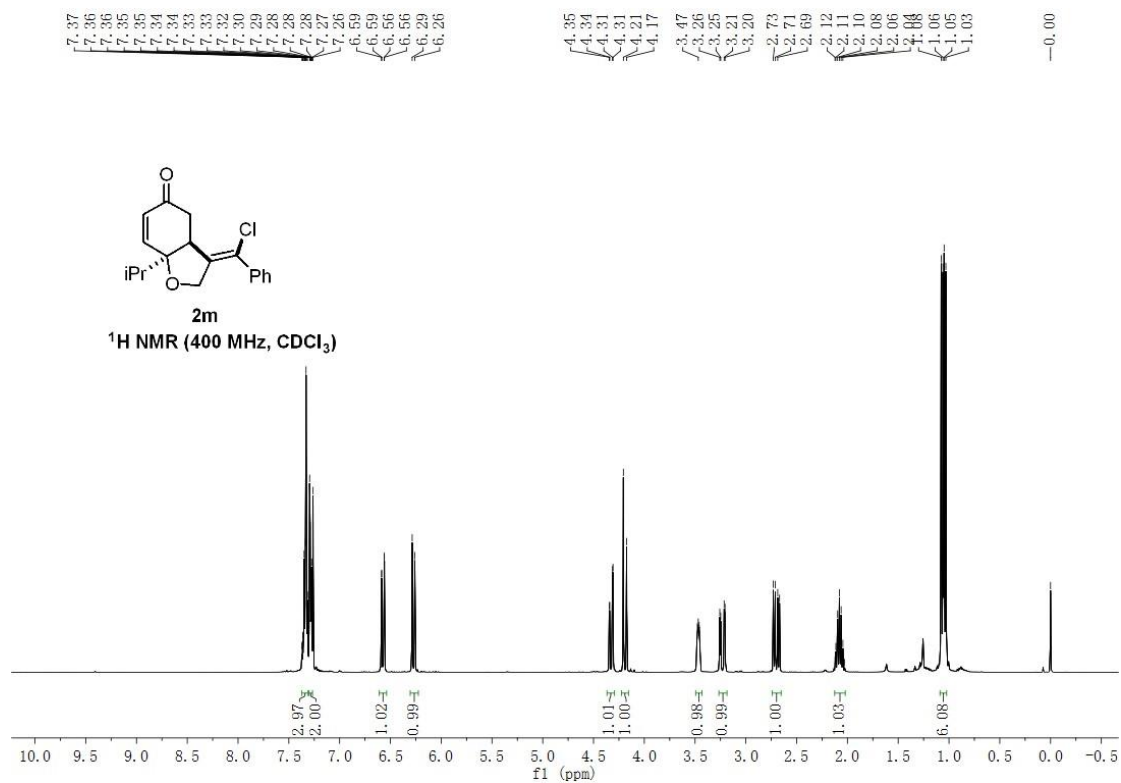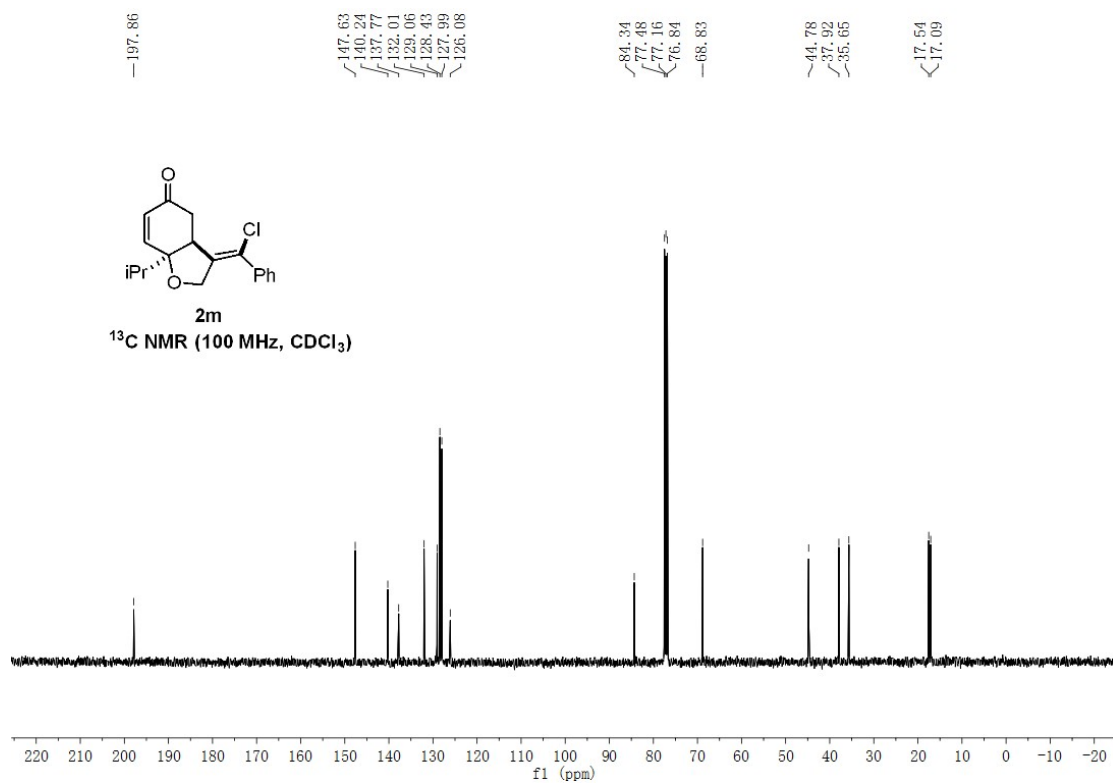



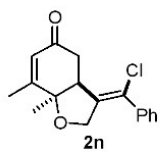

**<sup>1</sup>H NMR (400 MHz, CDCl<sub>3</sub>)**

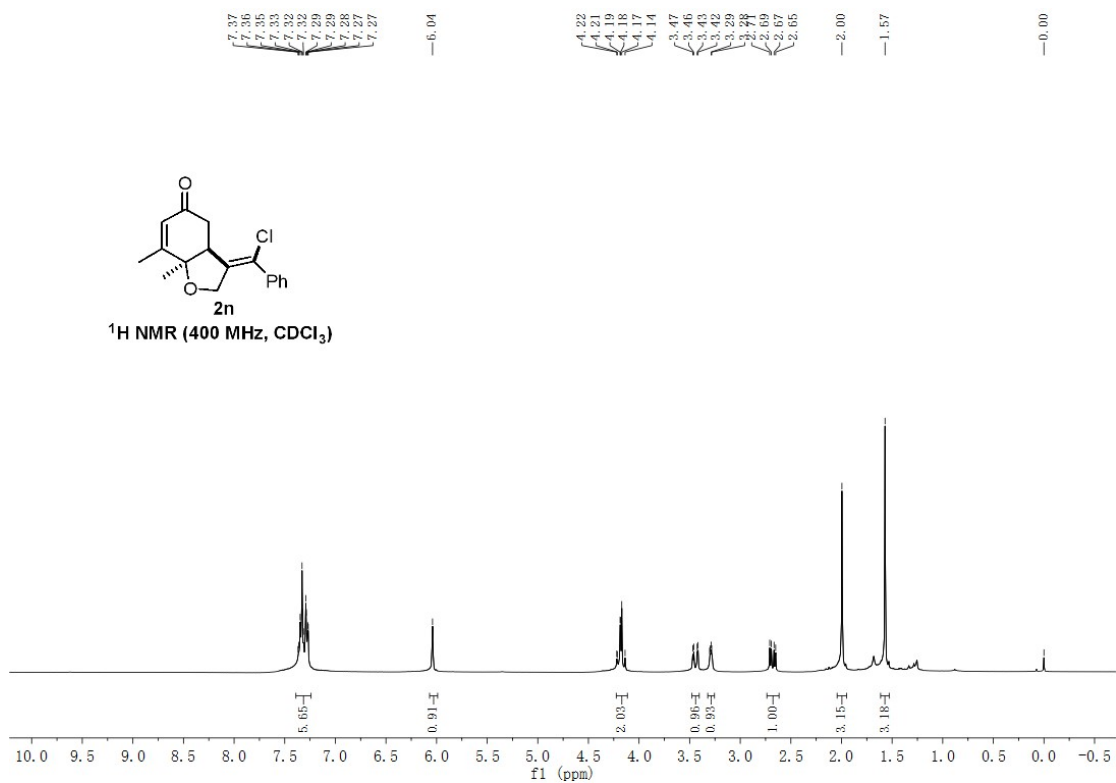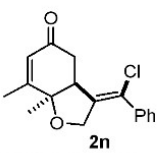

**<sup>13</sup>C NMR (100 MHz, CDCl<sub>3</sub>)**

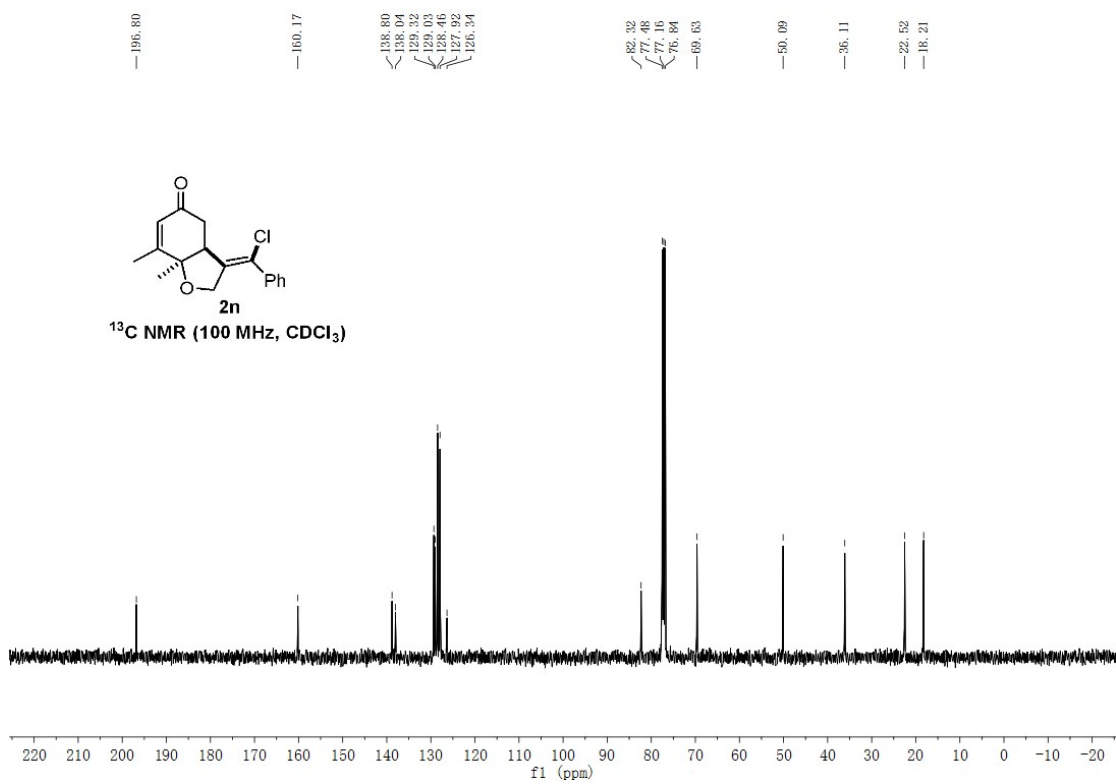

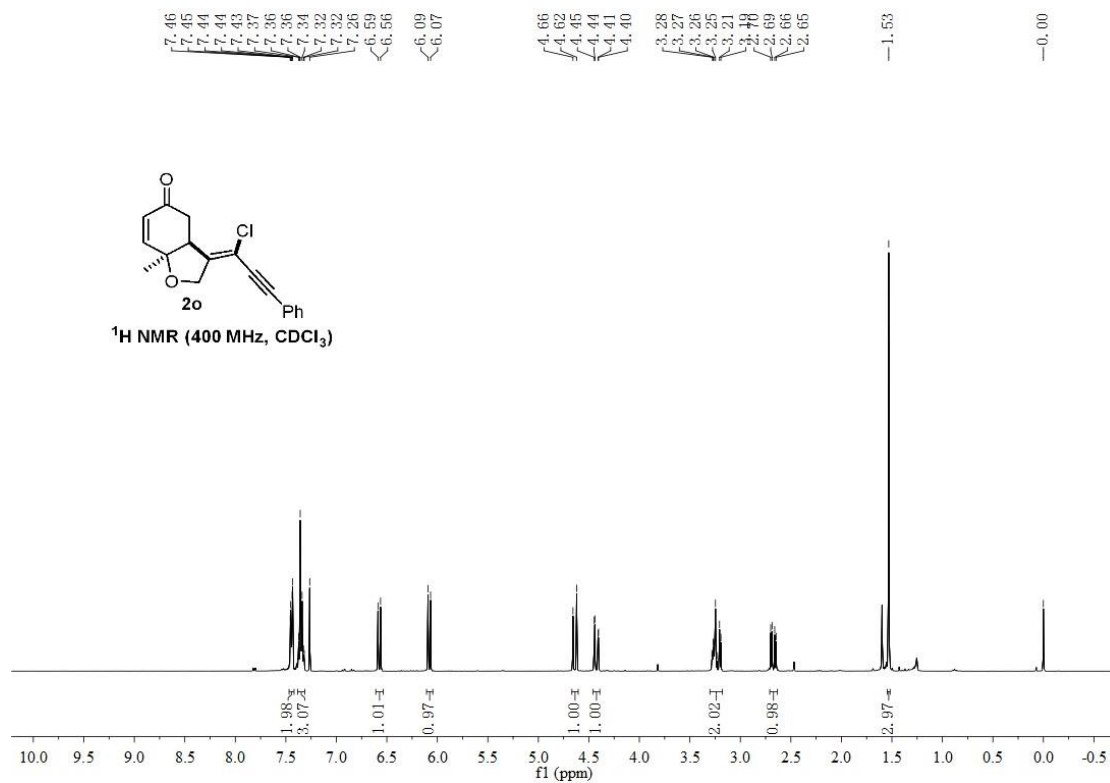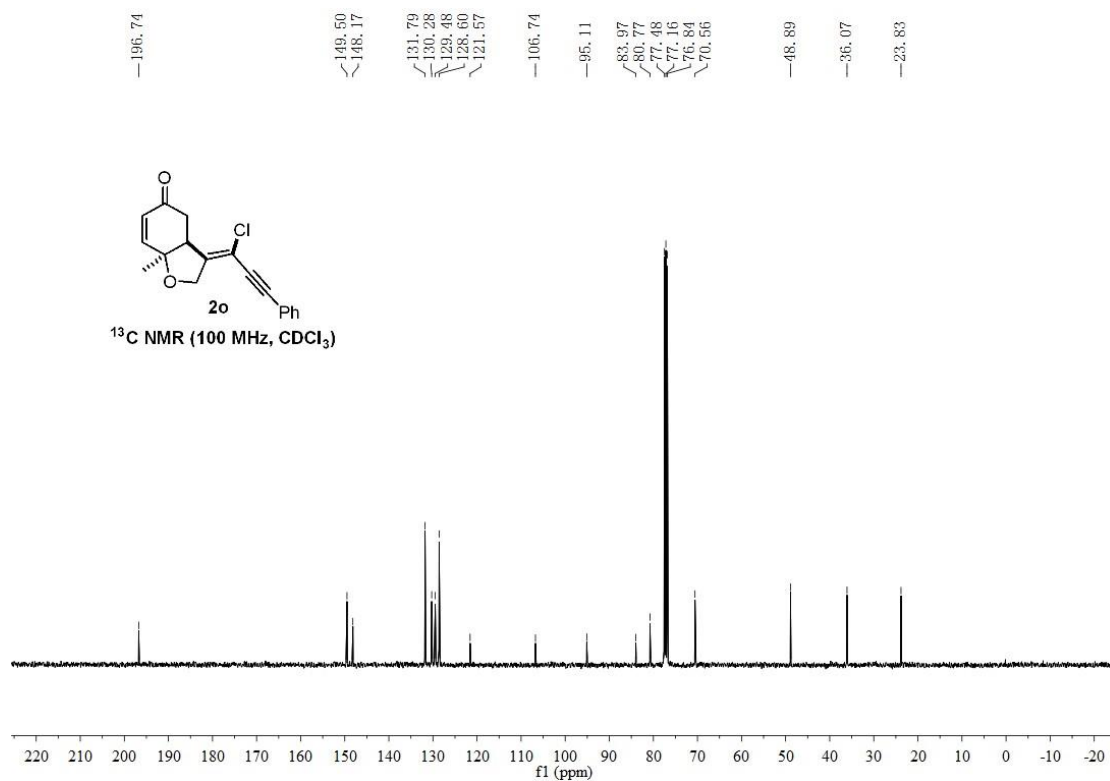

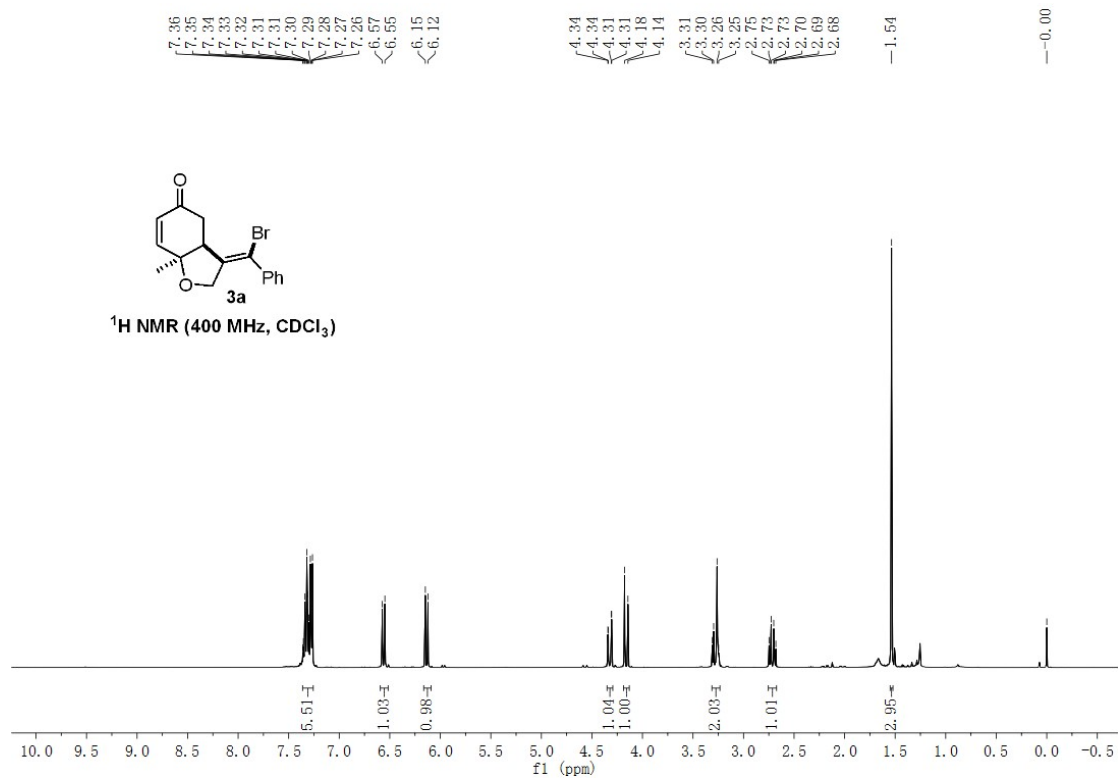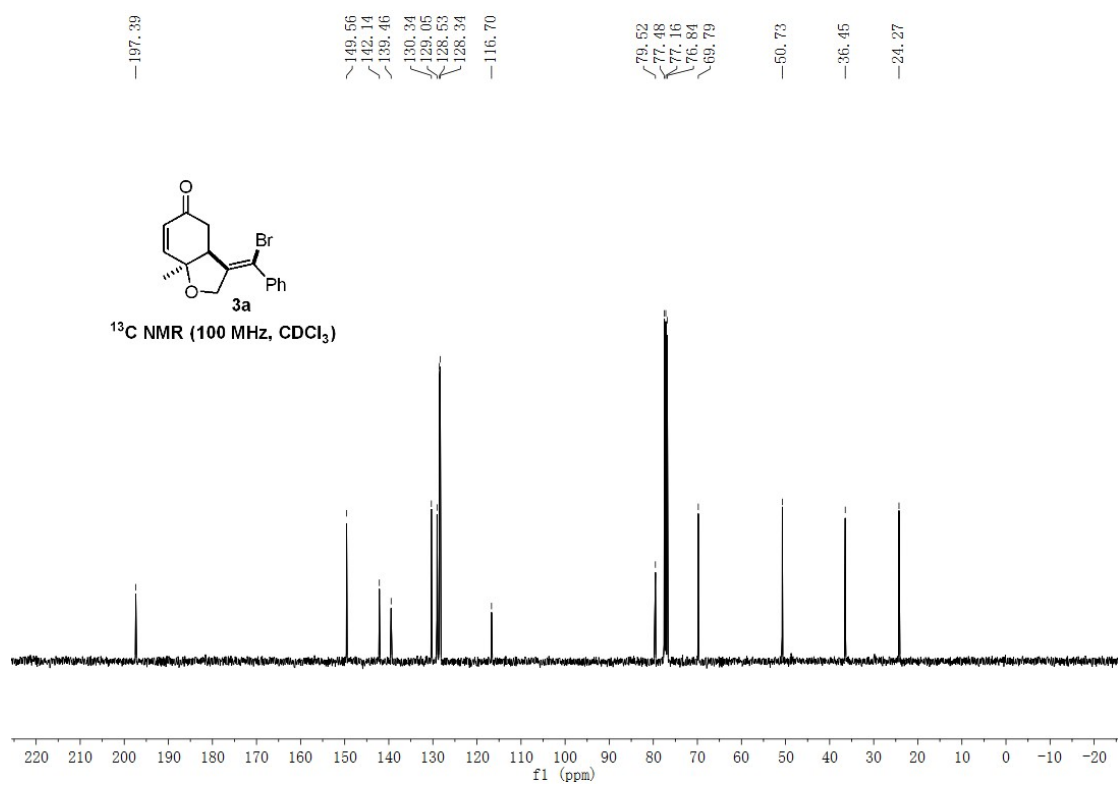

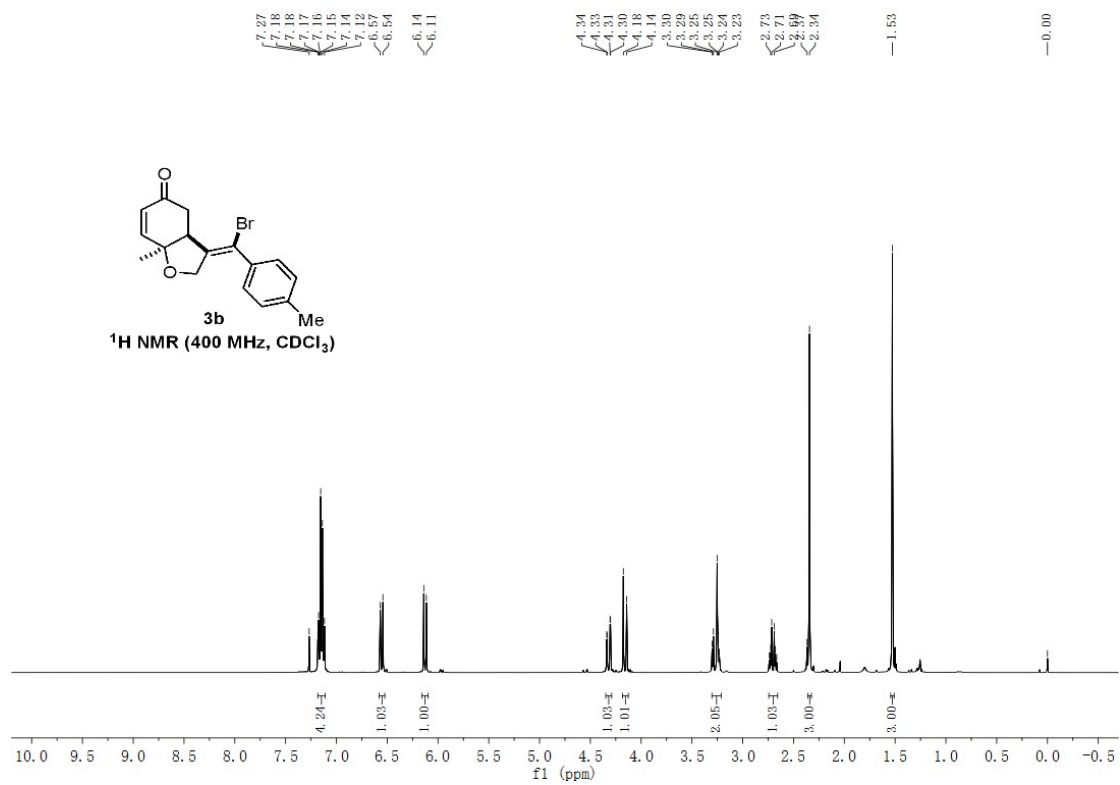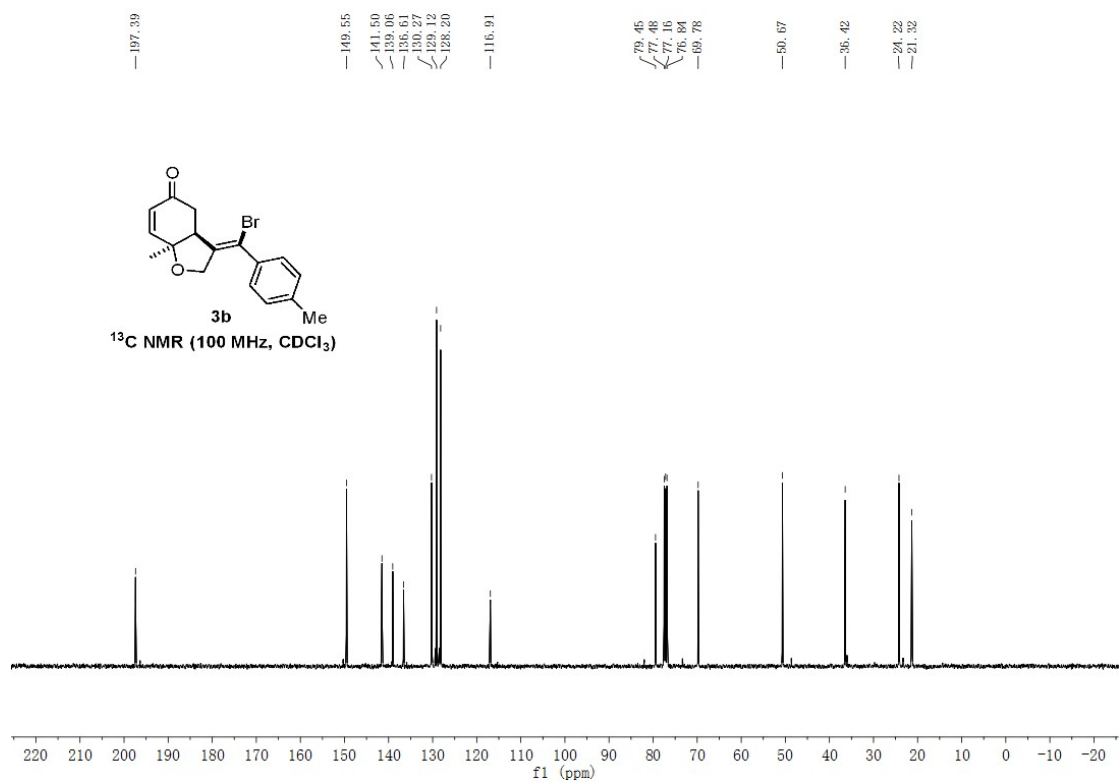

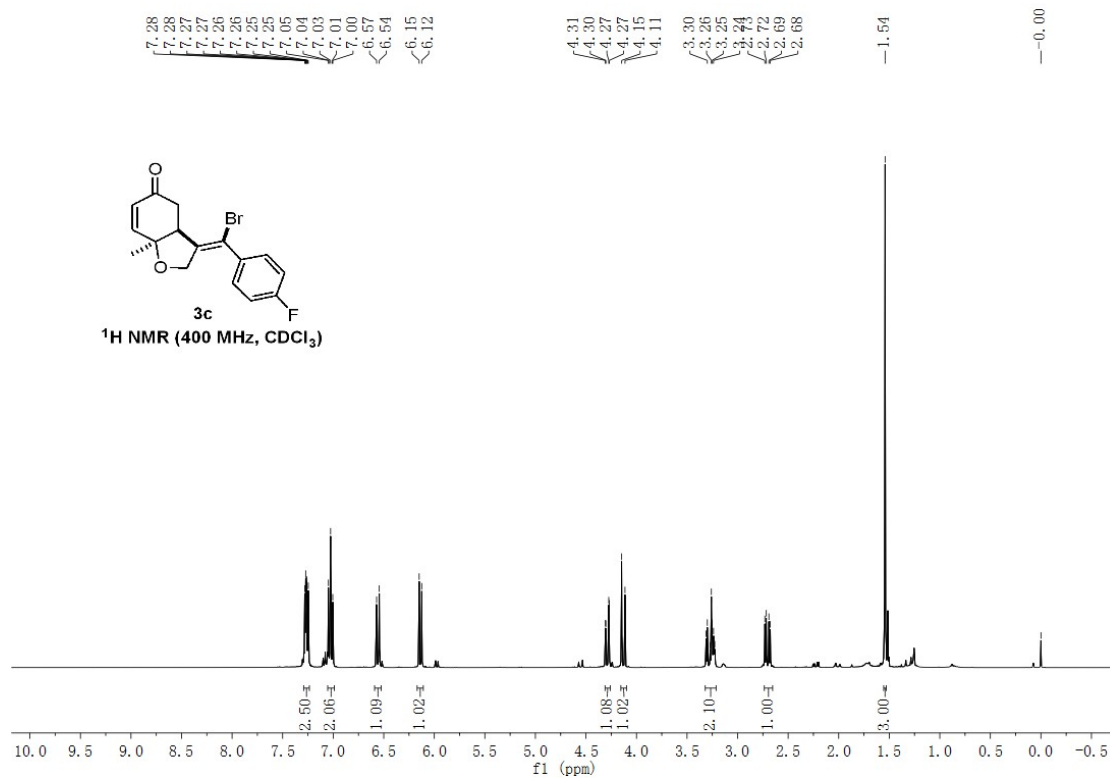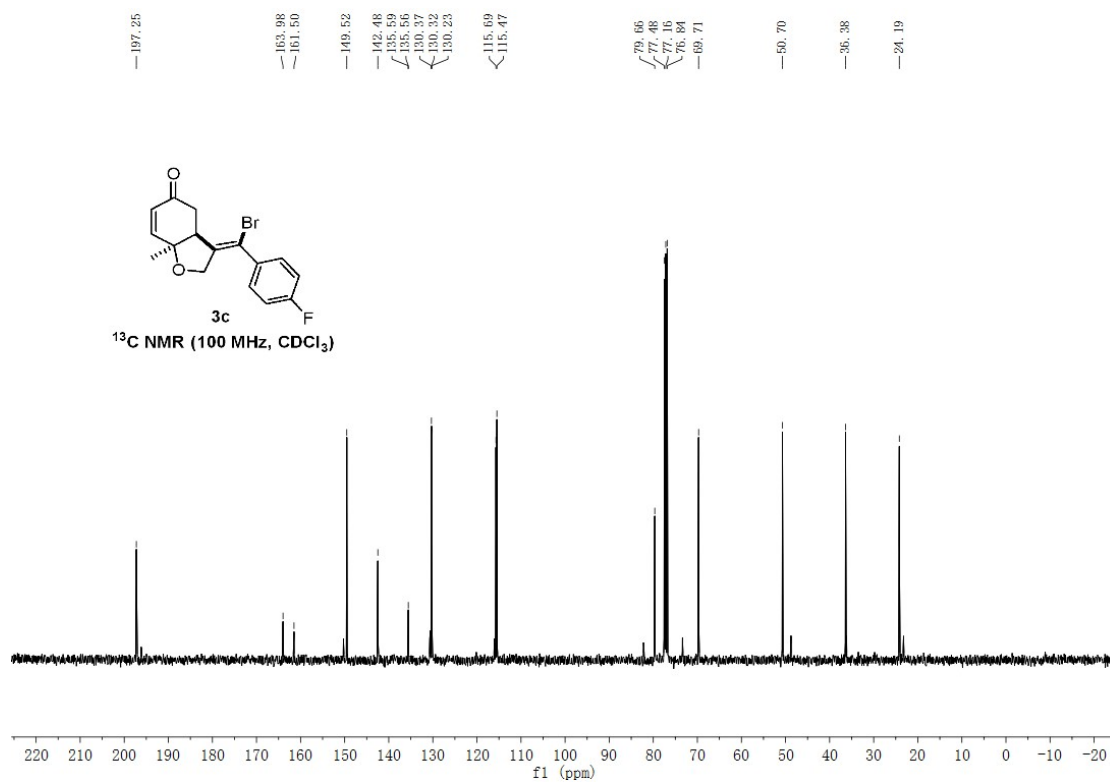

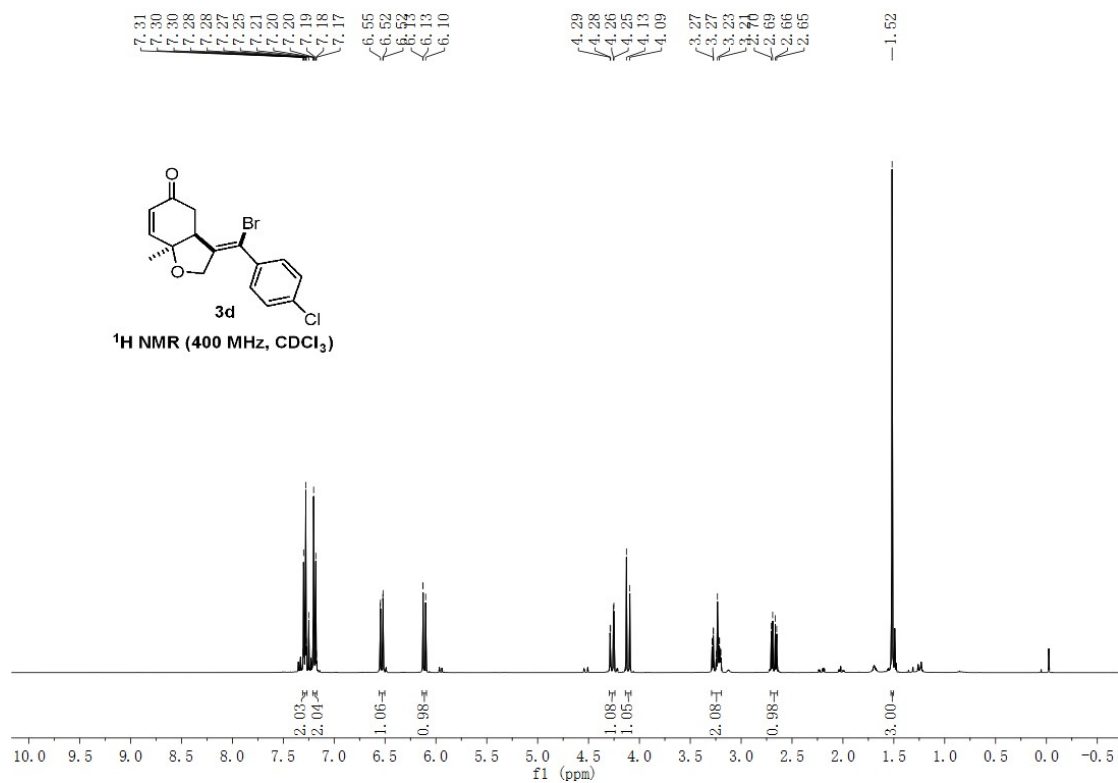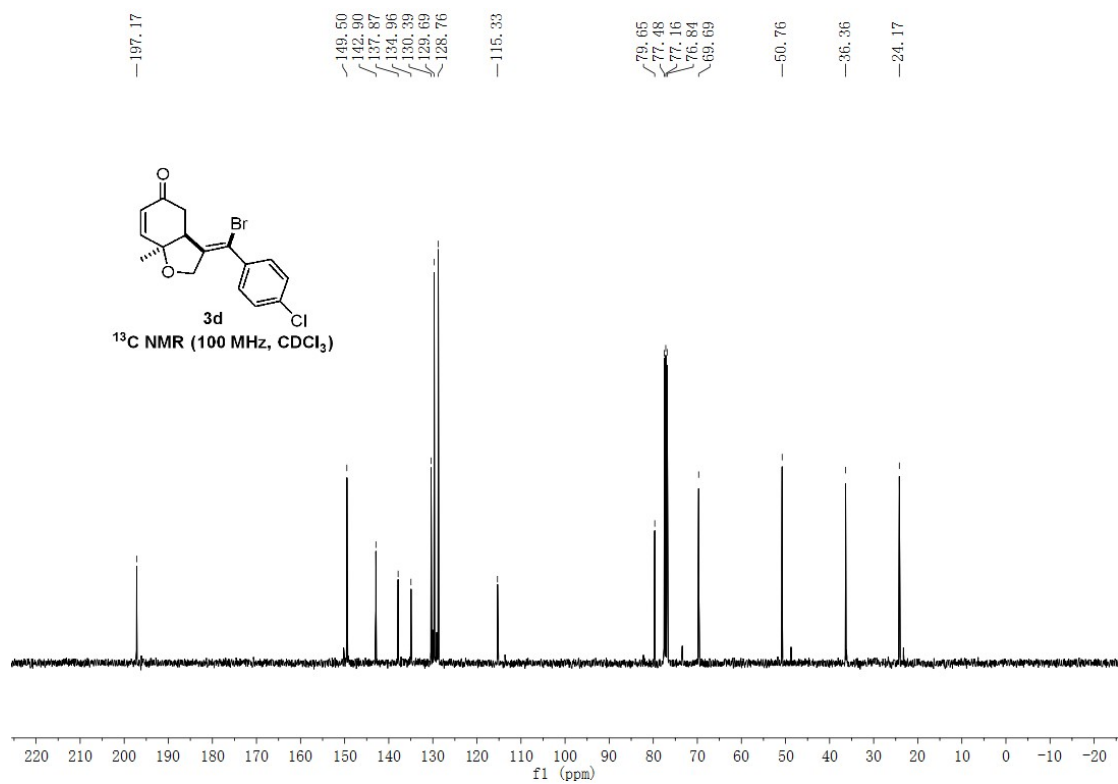

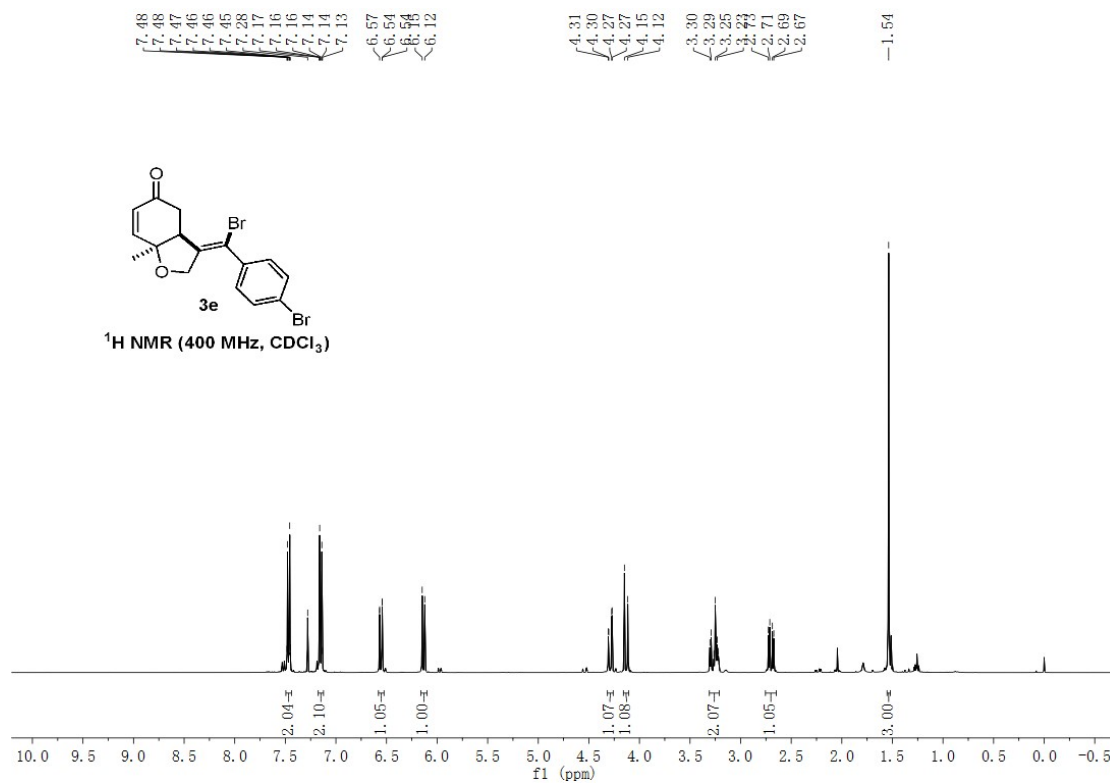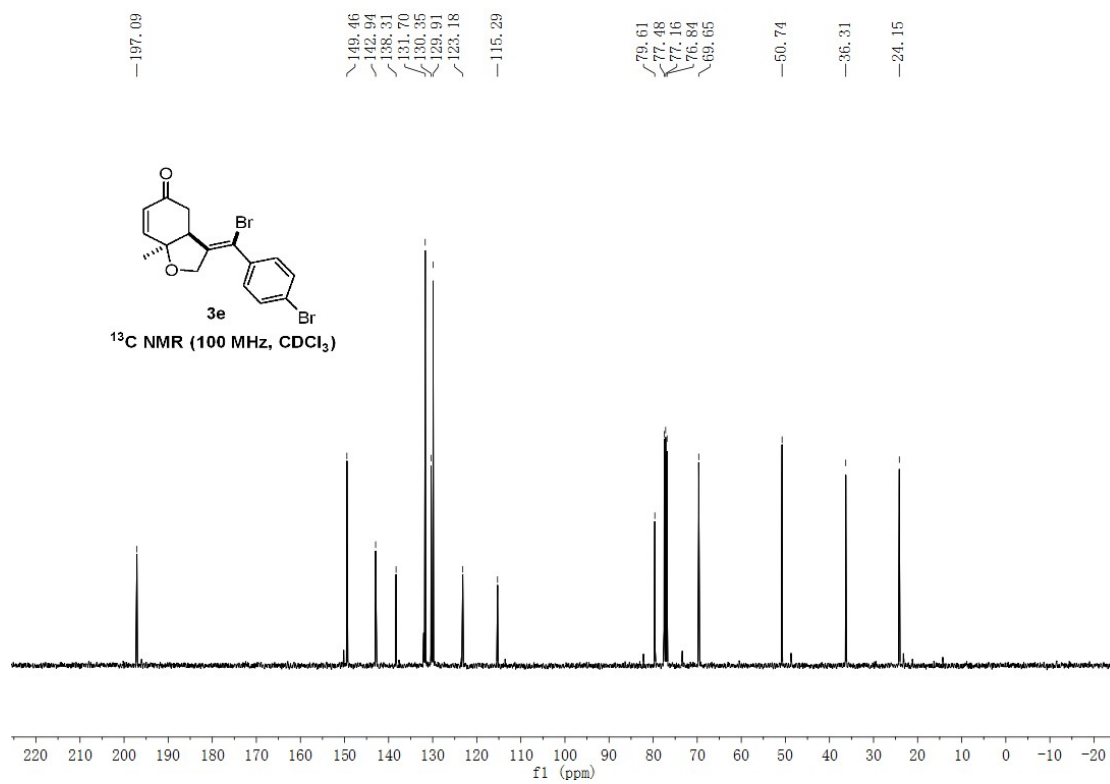

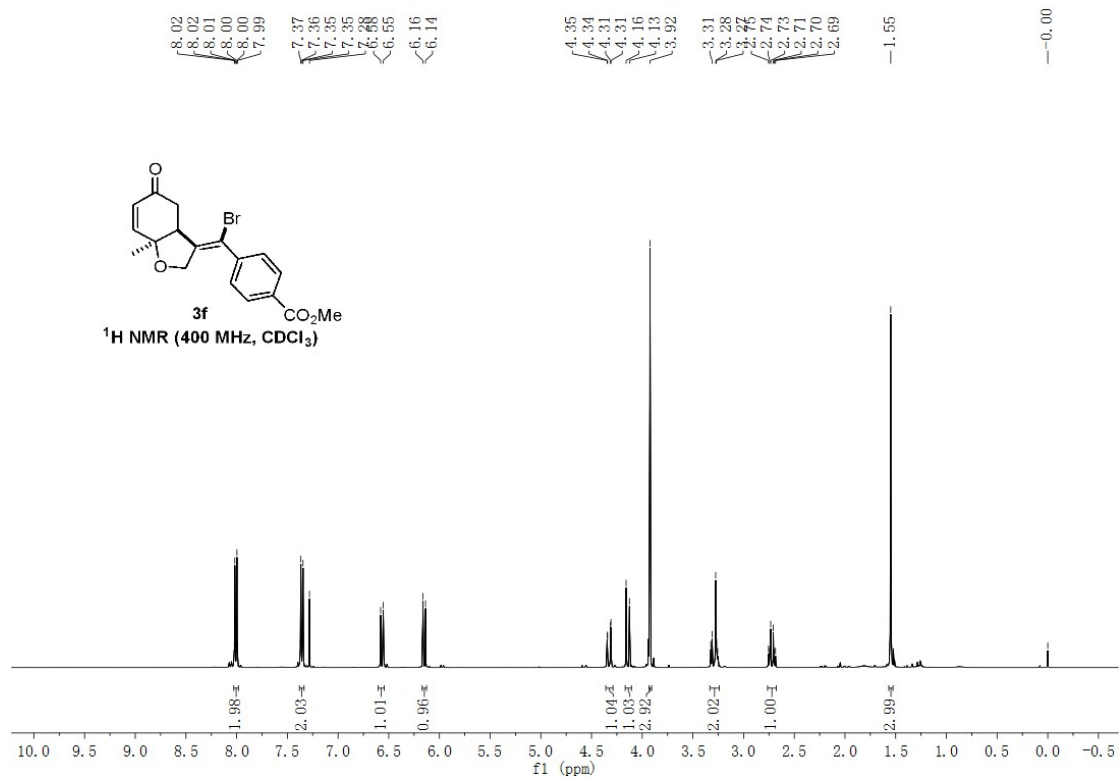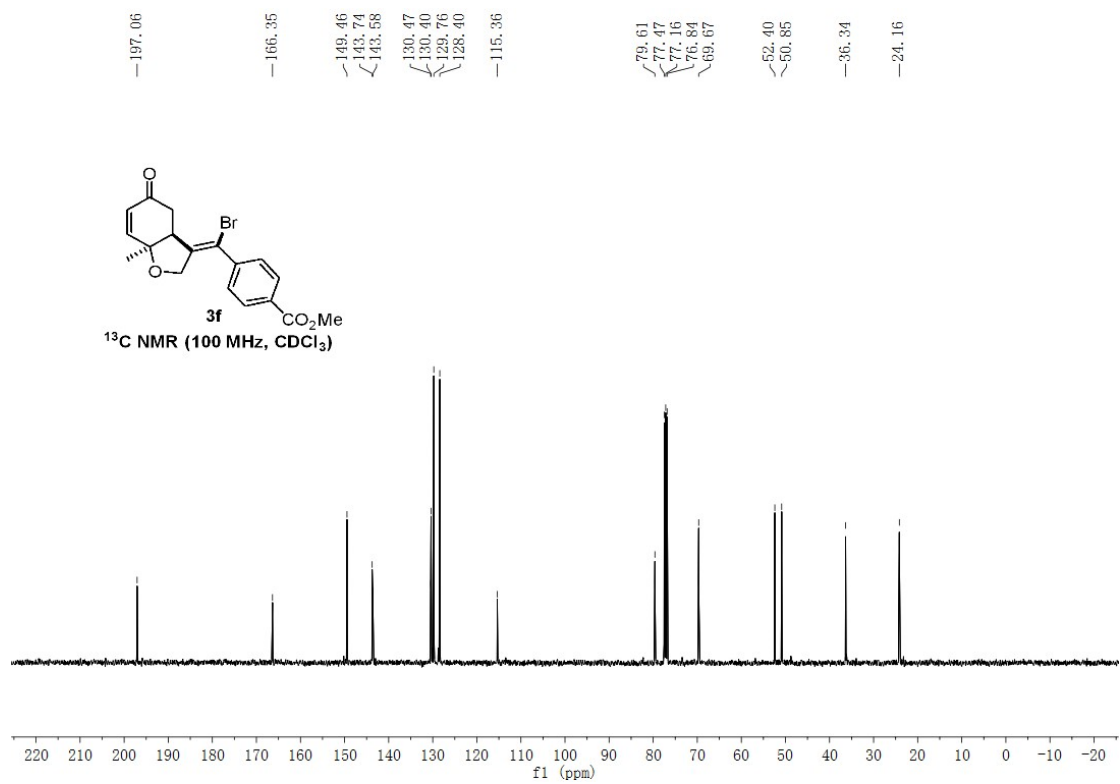



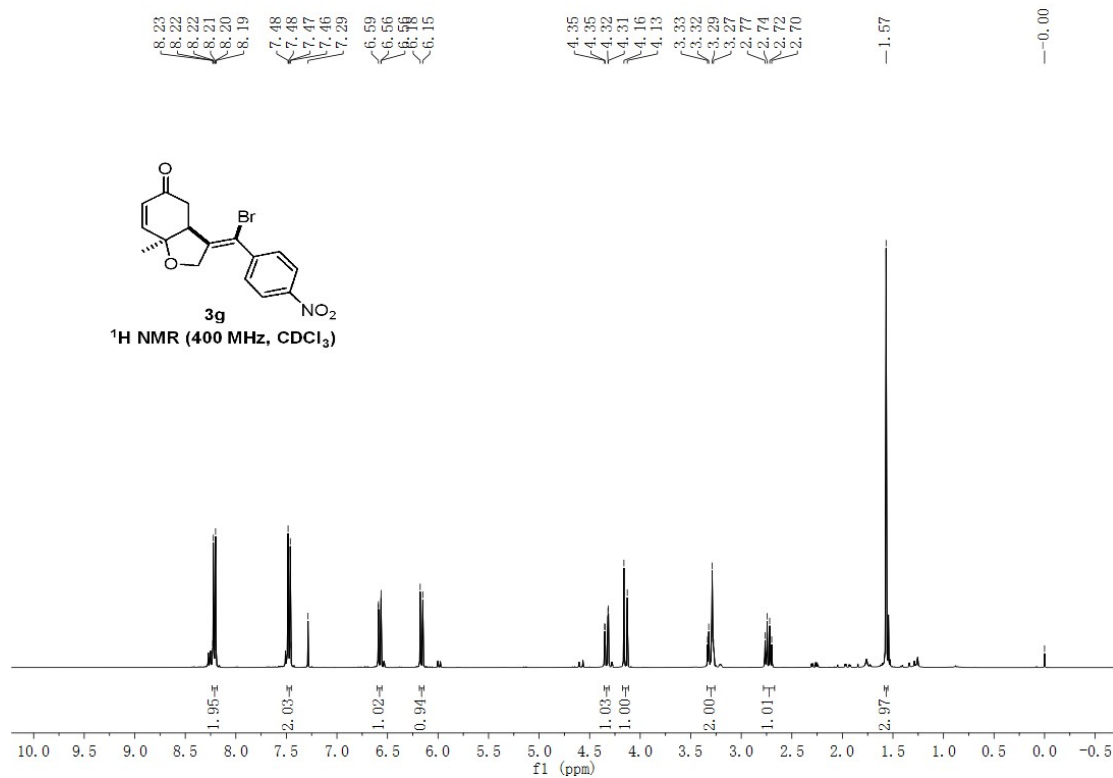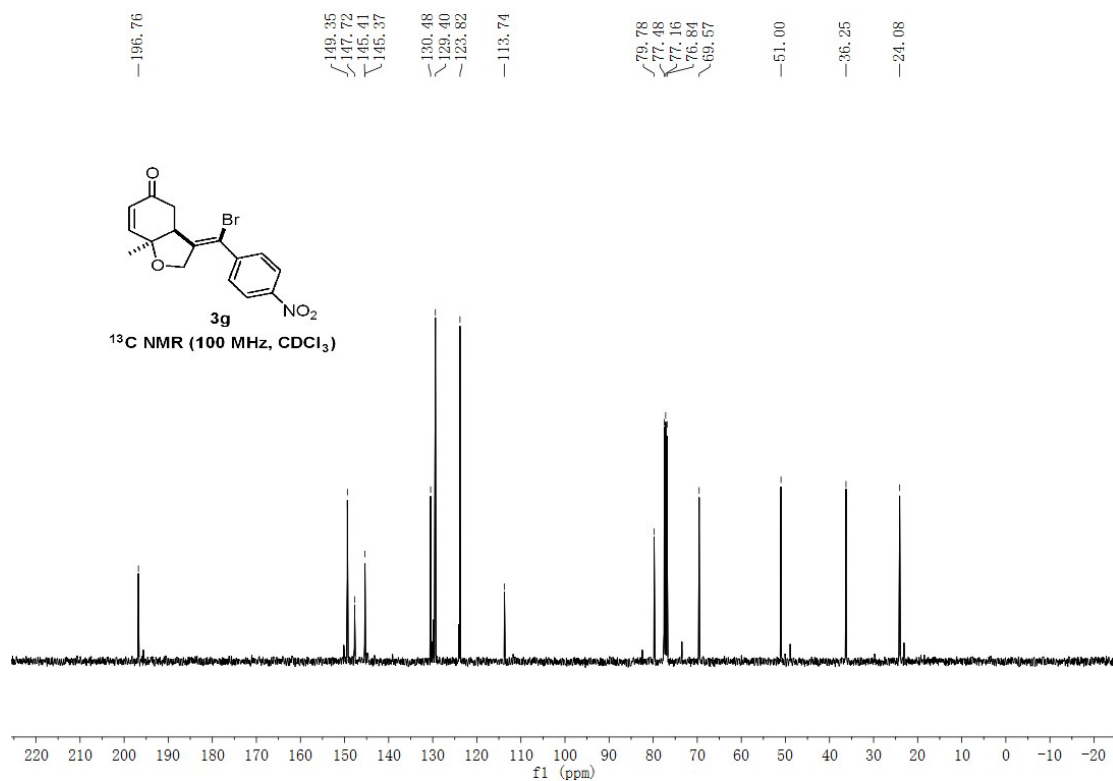

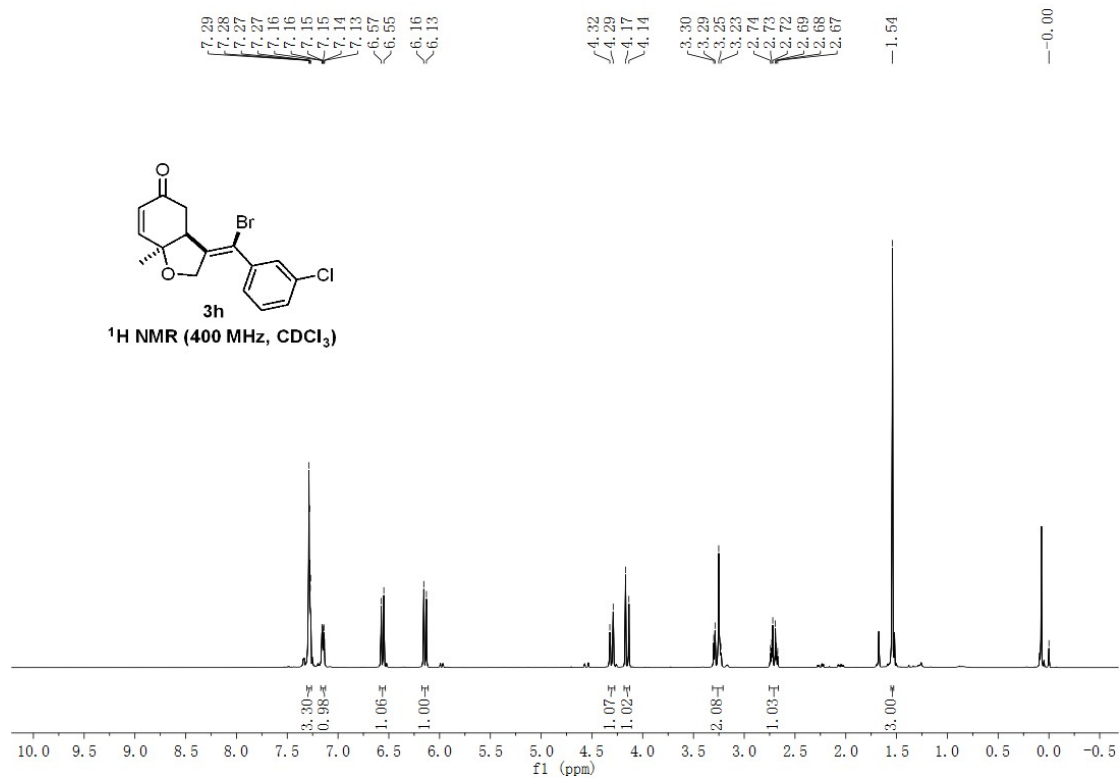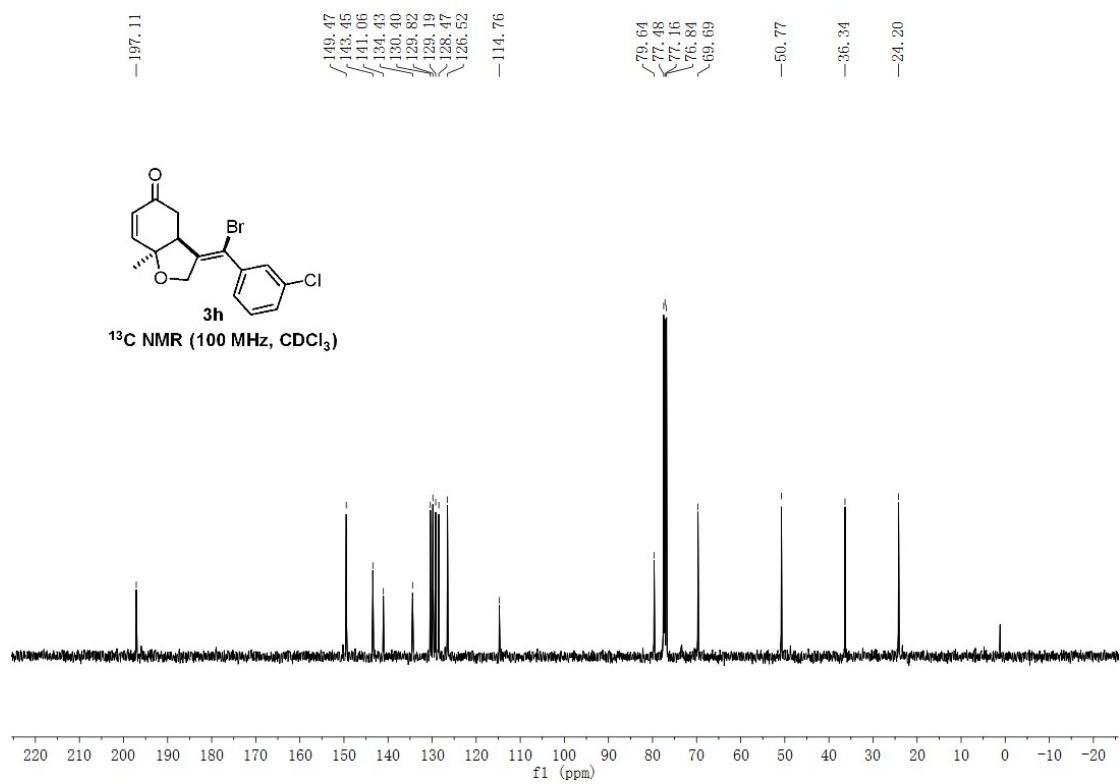

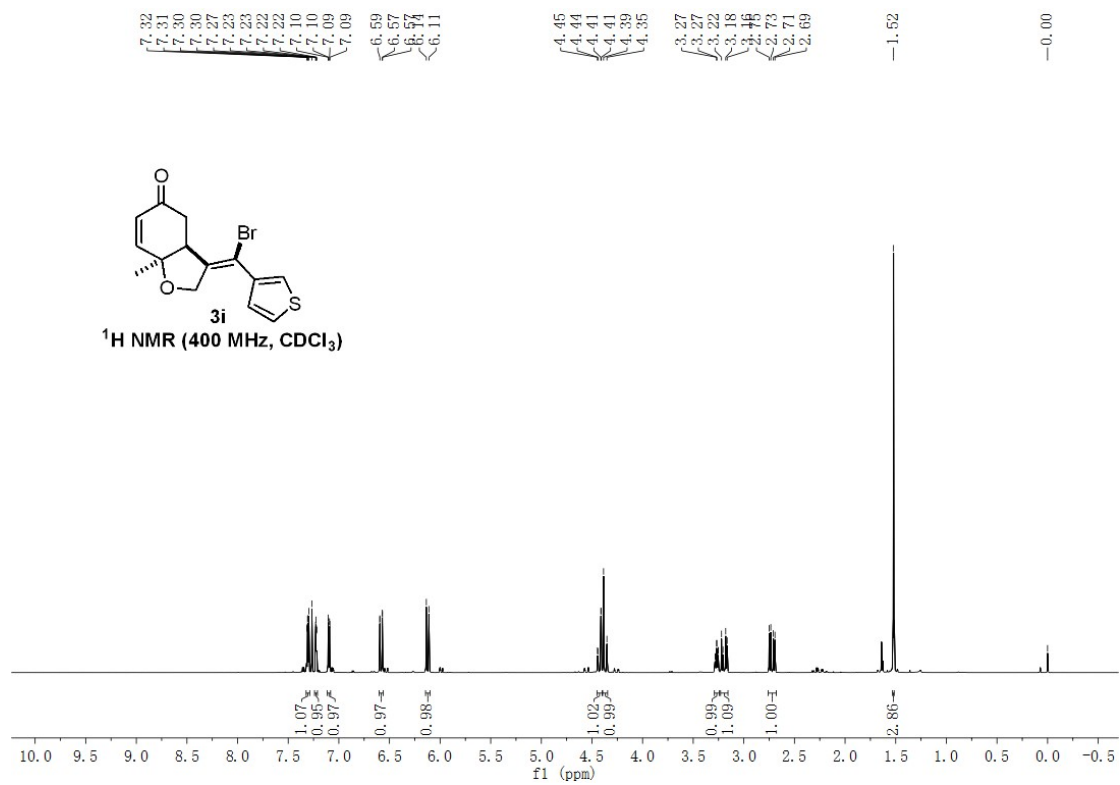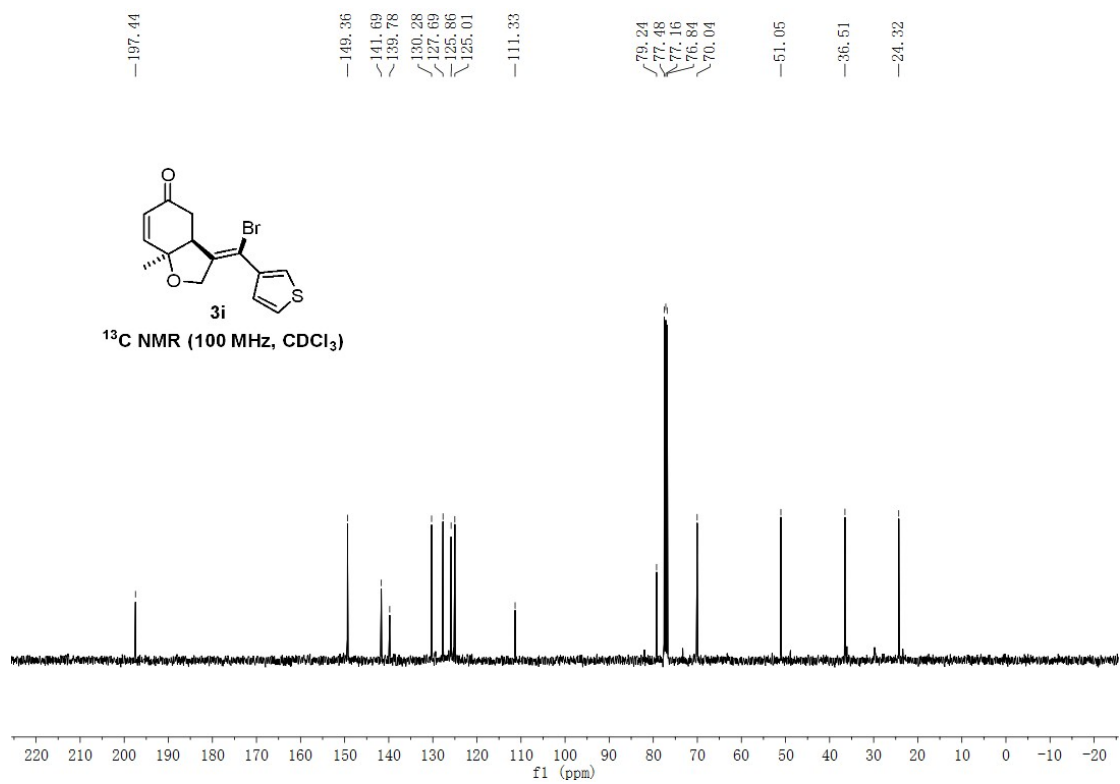

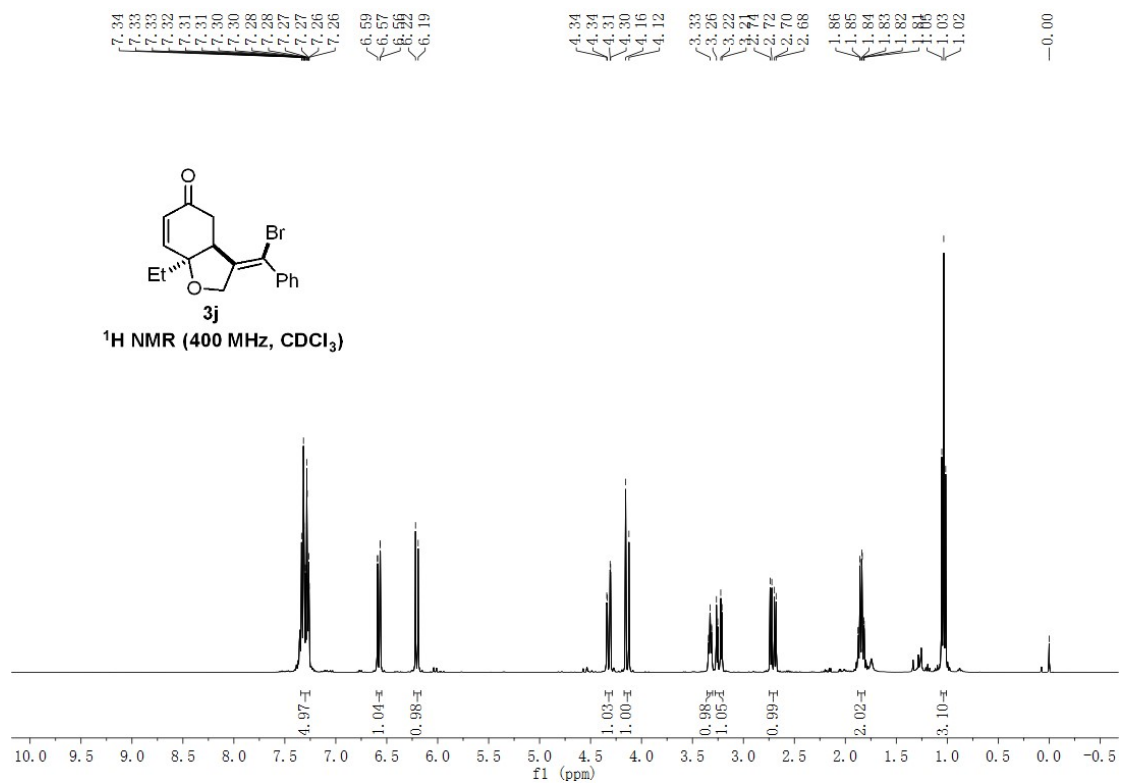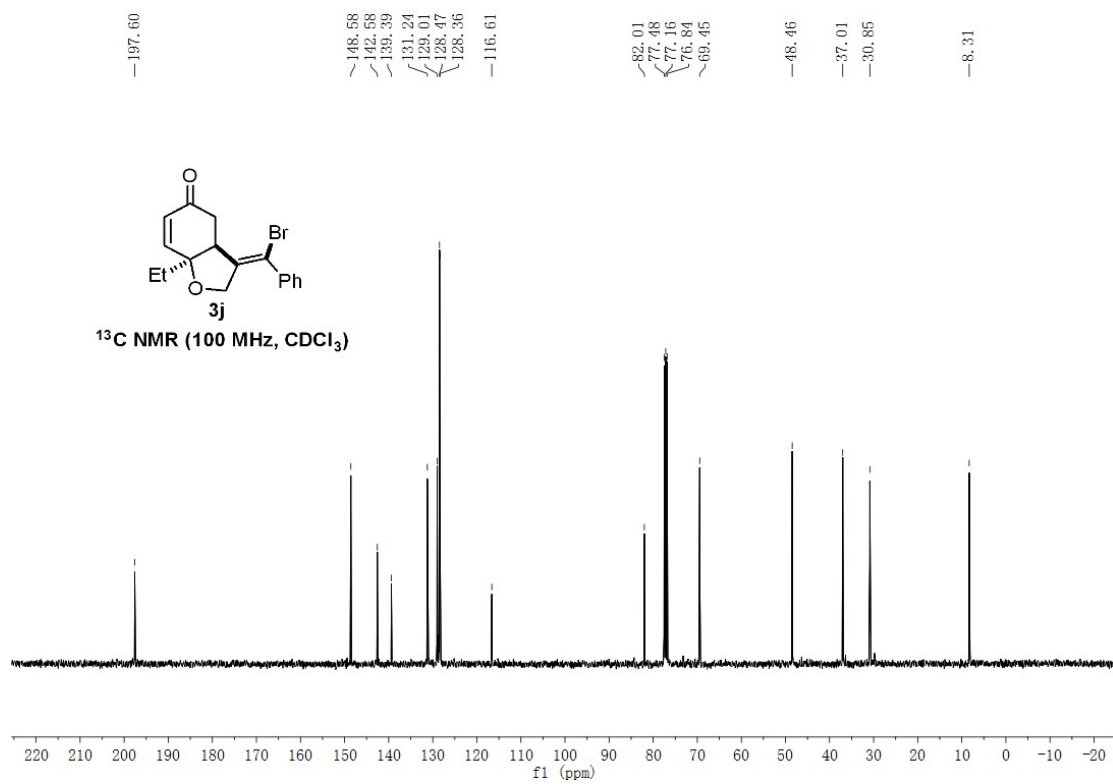

7.34  
7.33  
7.32  
7.31  
7.30  
7.28  
7.27  
7.26  
6.59  
6.57  
6.29  
6.26

4.29  
4.29  
4.26  
4.14  
4.11

3.25  
3.24  
3.20  
3.19

2.73  
2.72  
2.69

2.09  
2.08  
2.06  
1.84

1.07  
1.05  
1.04

-0.00

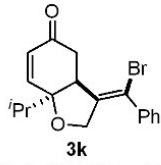

<sup>1</sup>H NMR (400 MHz, CDCl<sub>3</sub>)

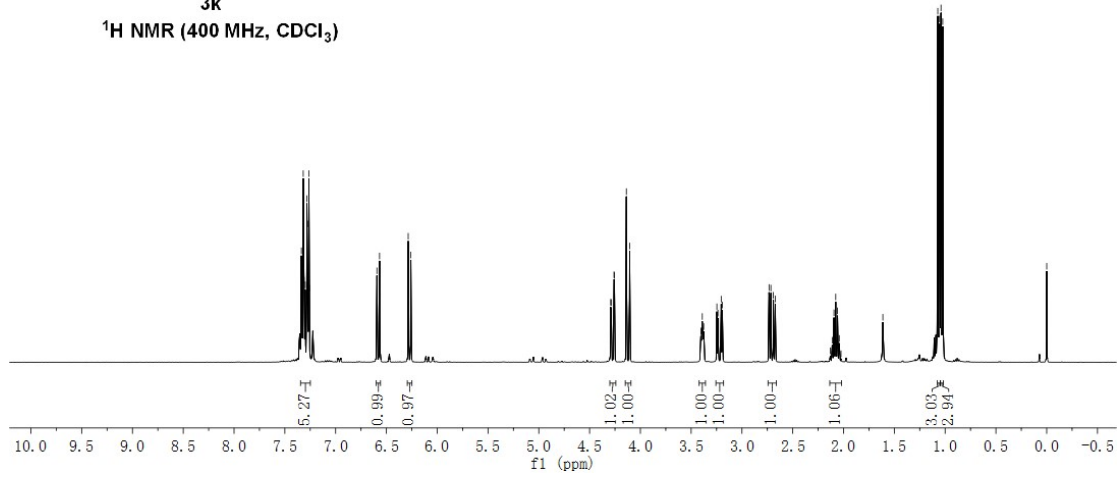

197.90

147.43  
143.19  
139.34  
131.96  
129.04  
128.46

116.72

84.19  
77.48  
77.16  
76.84

69.05

46.58

38.04  
35.62

17.45  
17.16

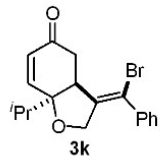

<sup>13</sup>C NMR (100 MHz, CDCl<sub>3</sub>)

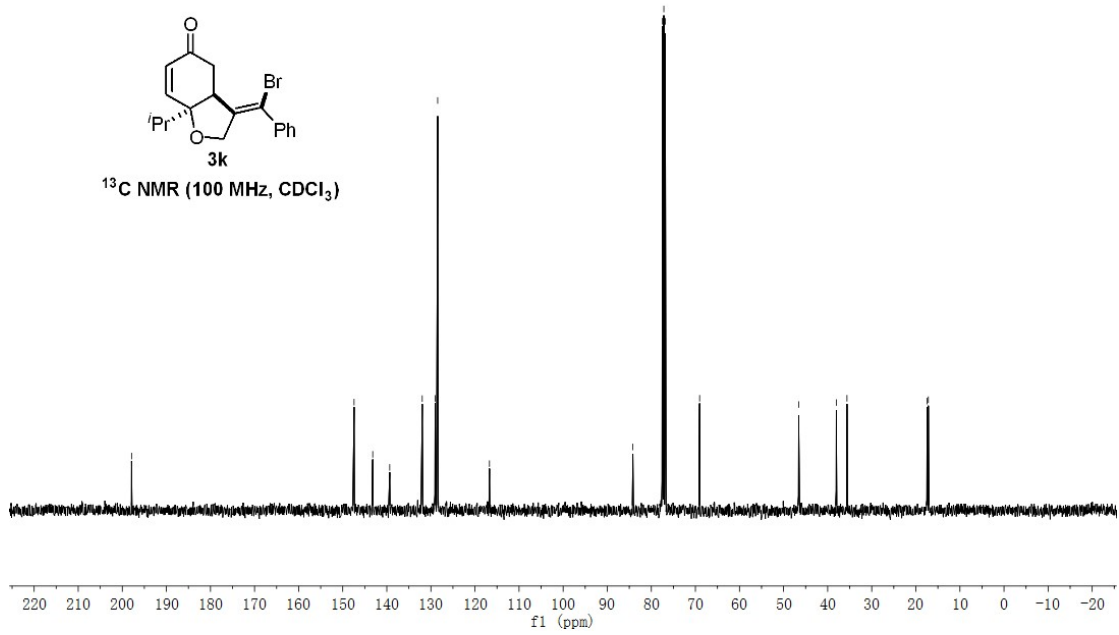

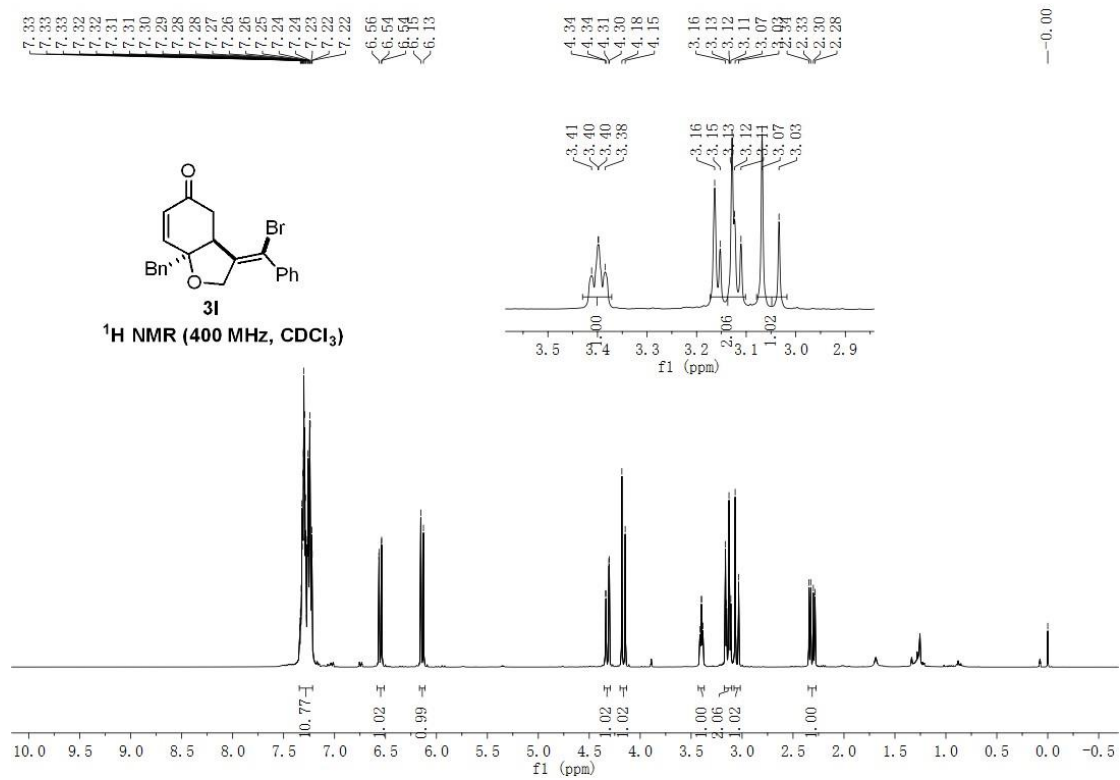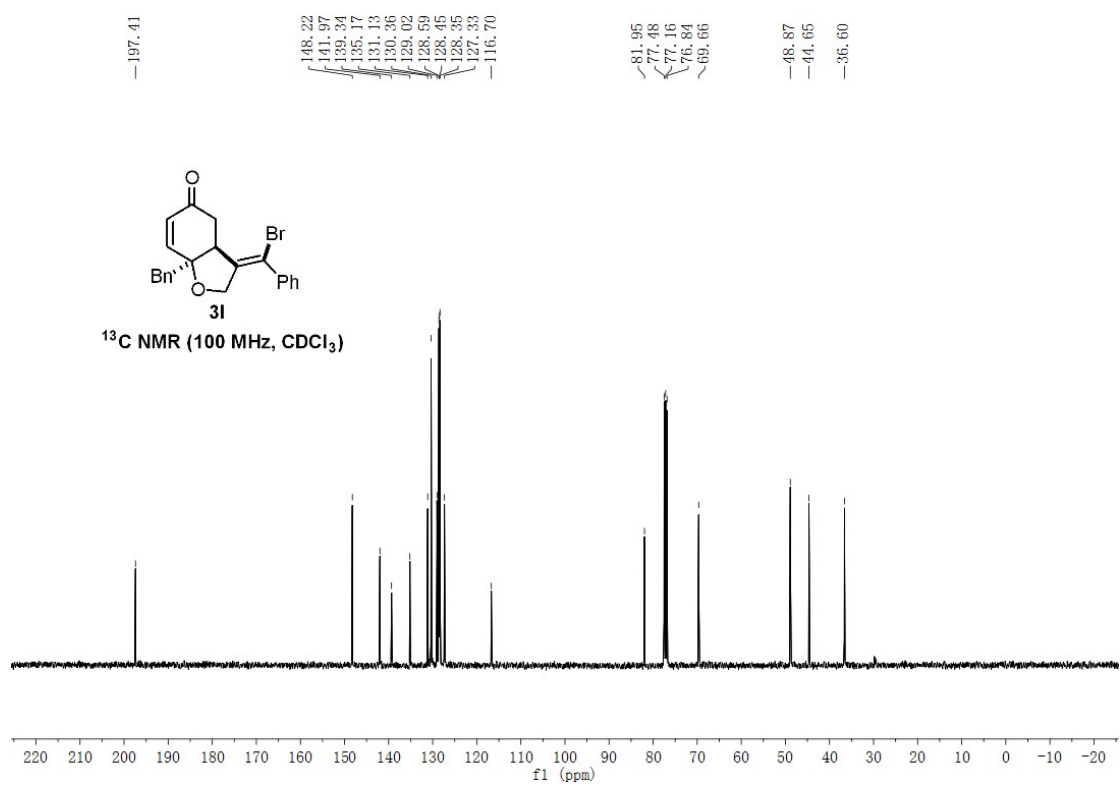

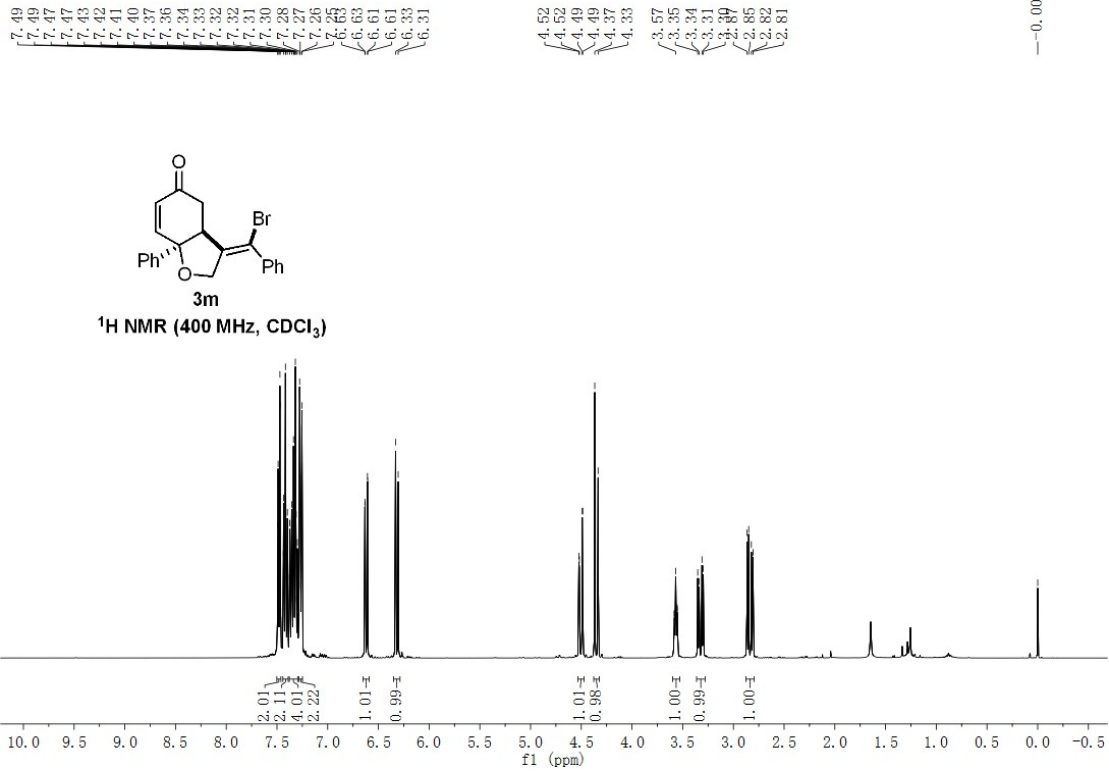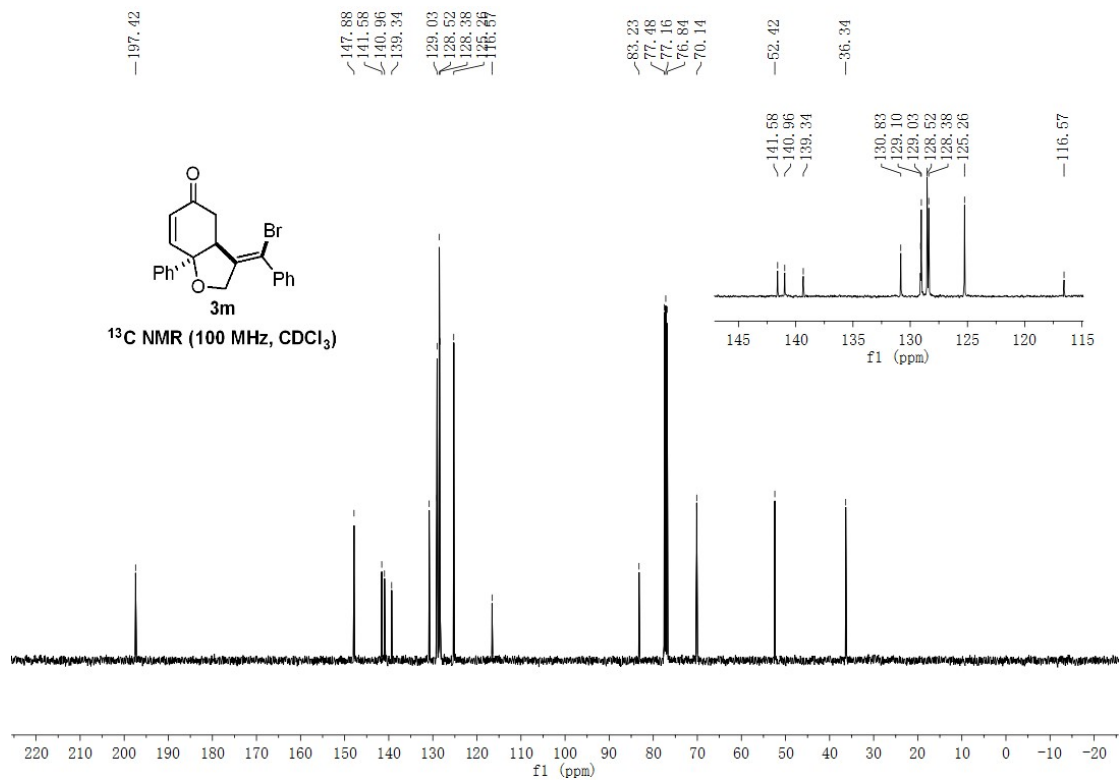

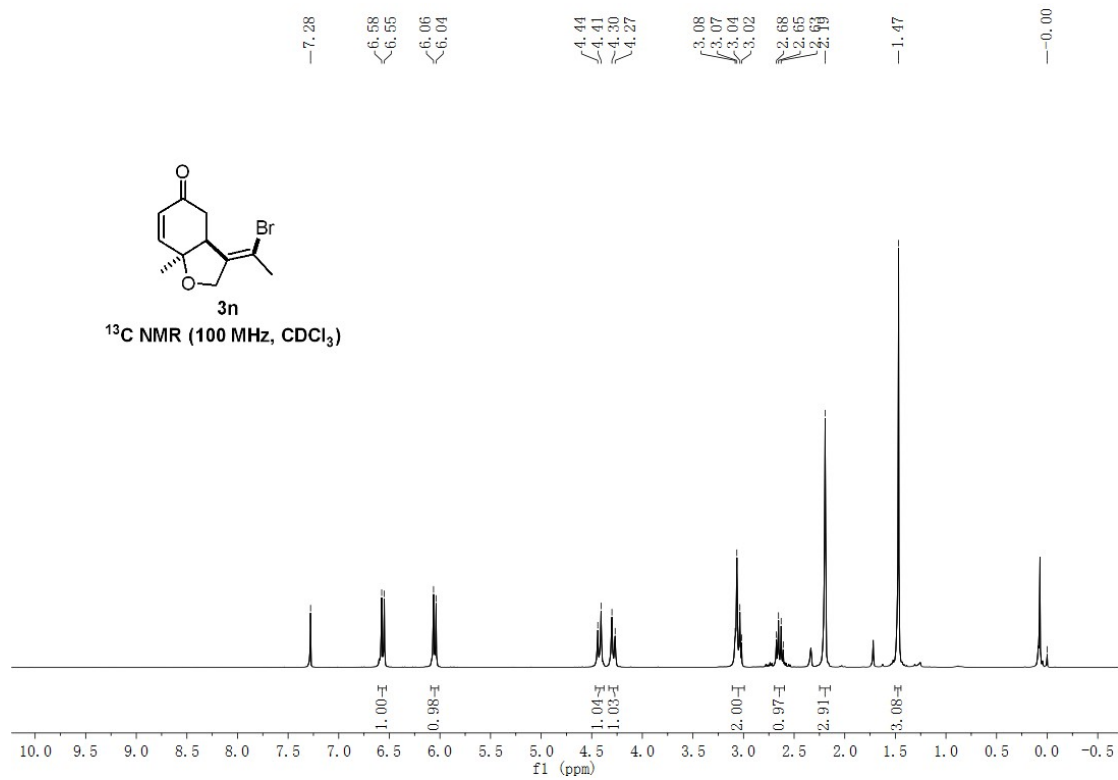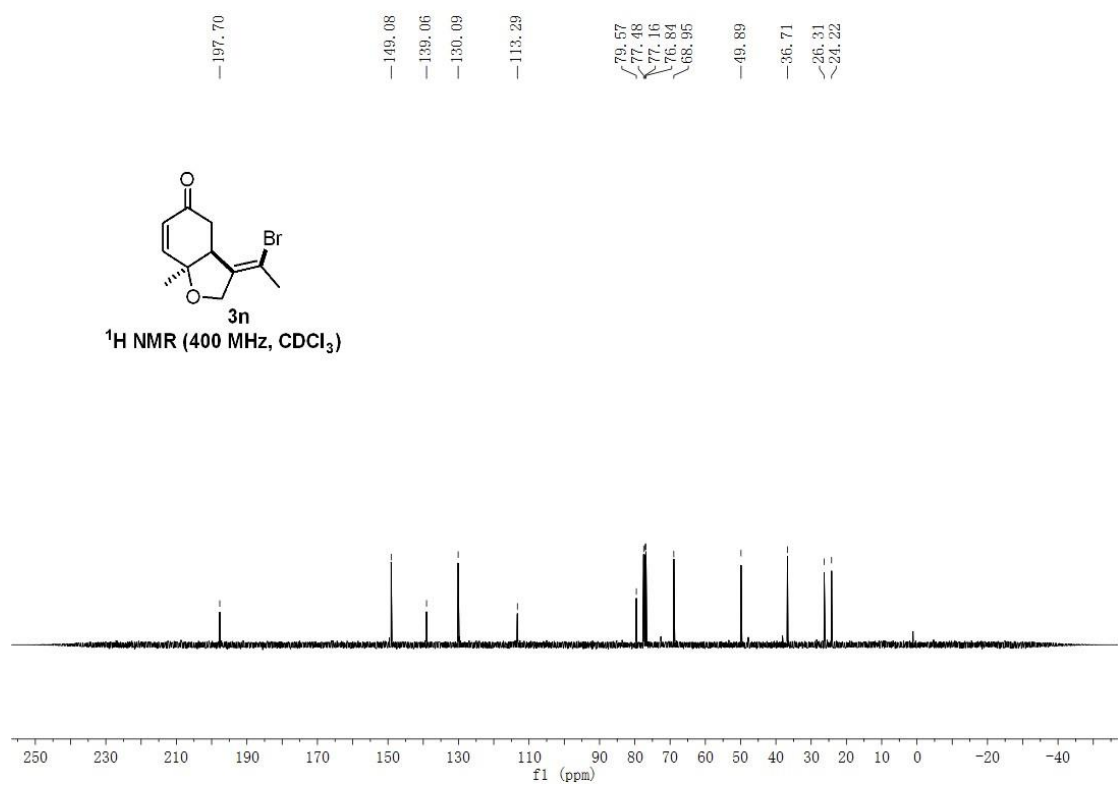



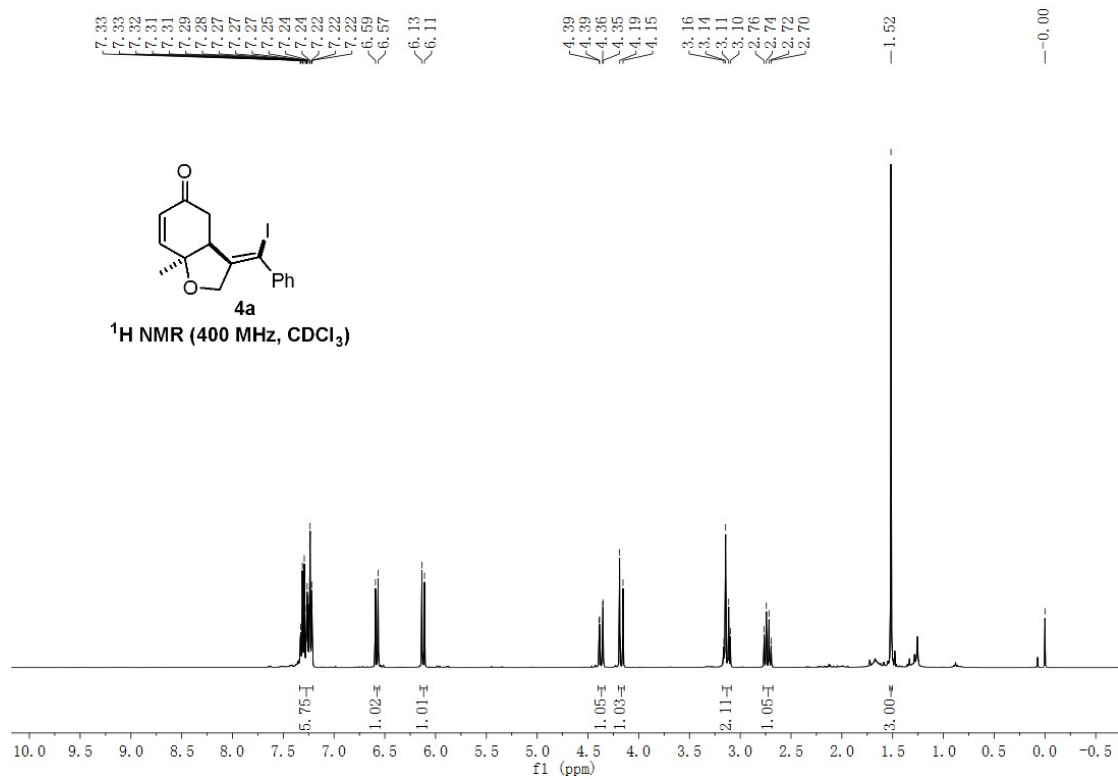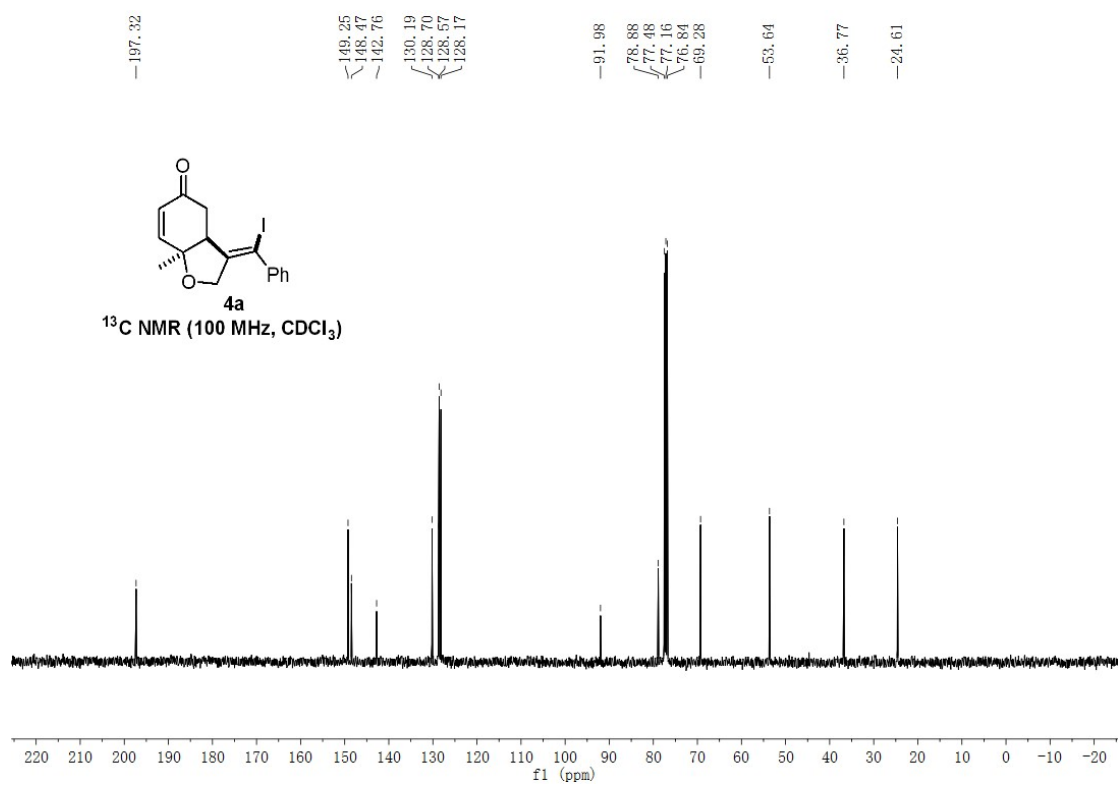

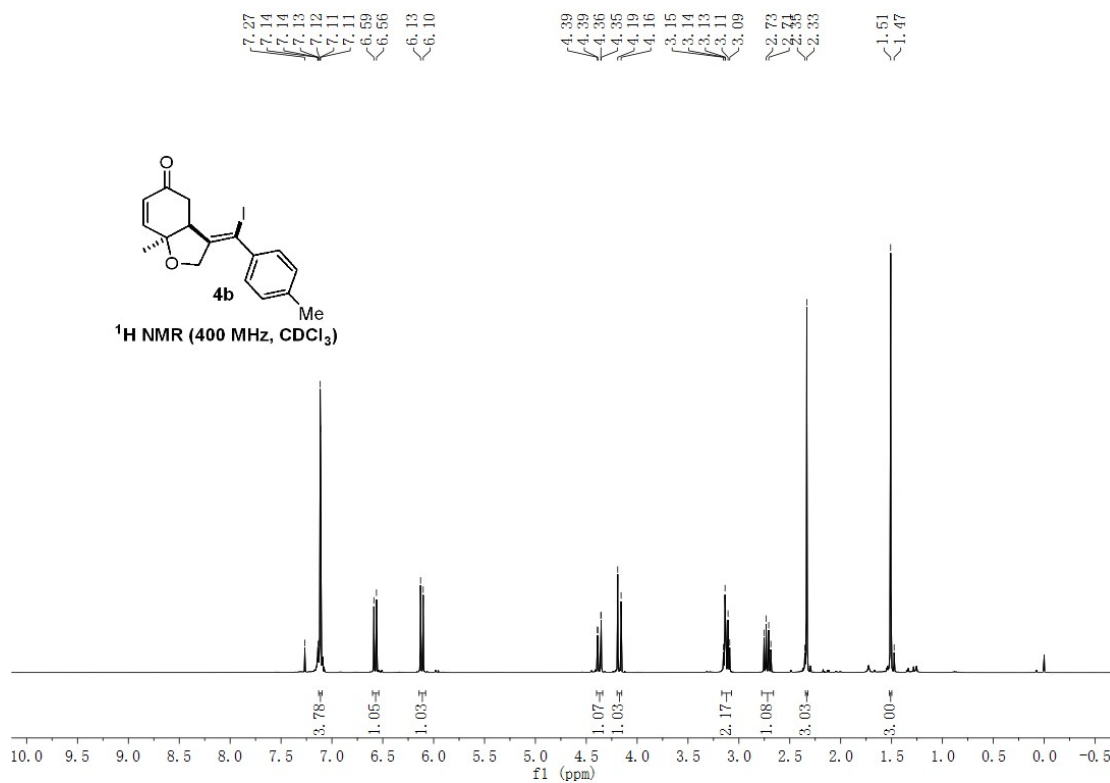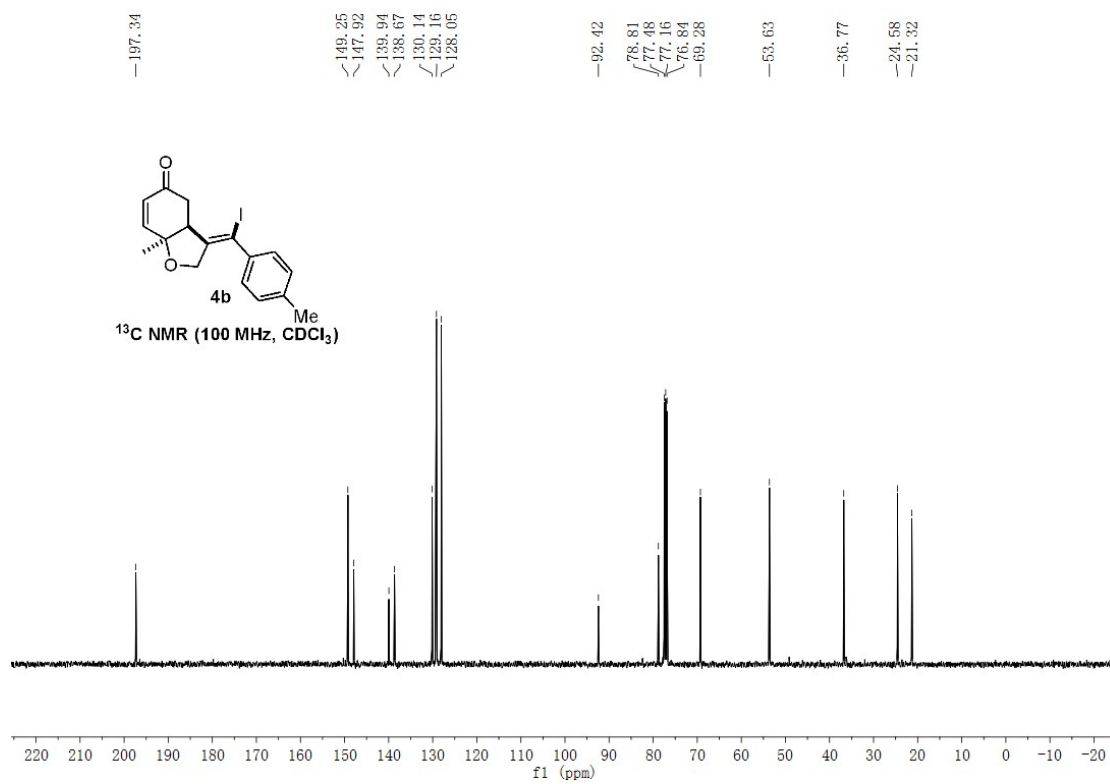

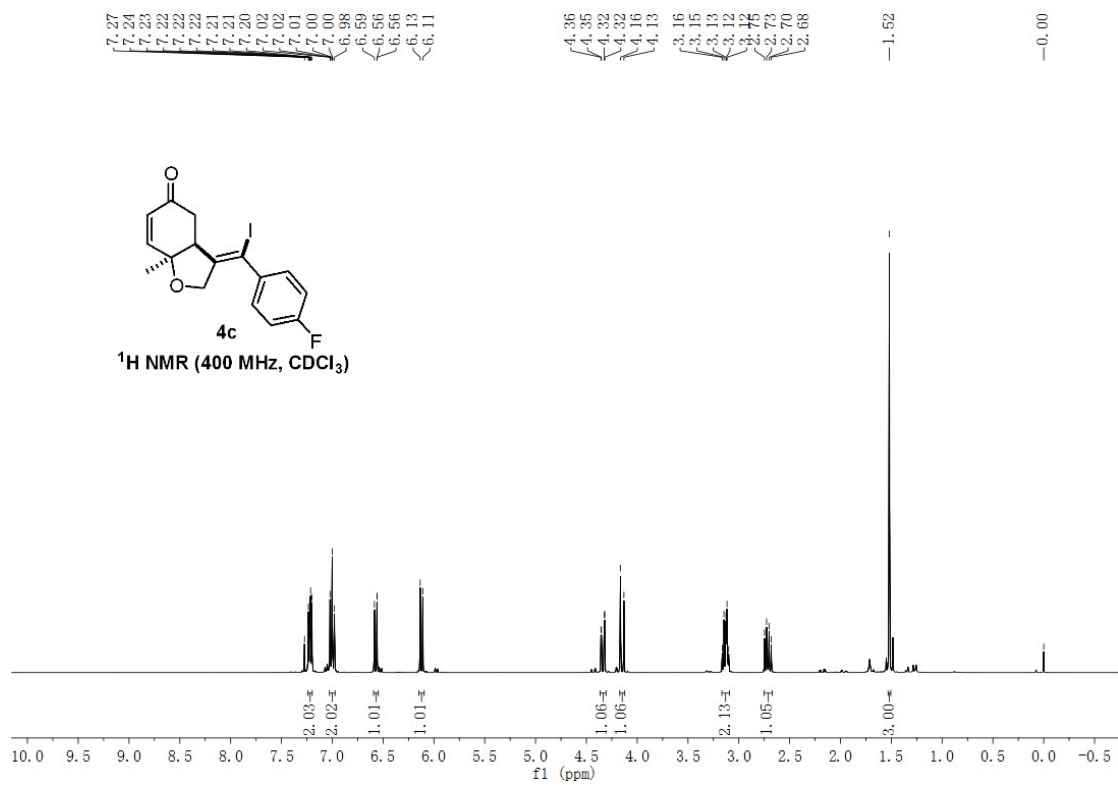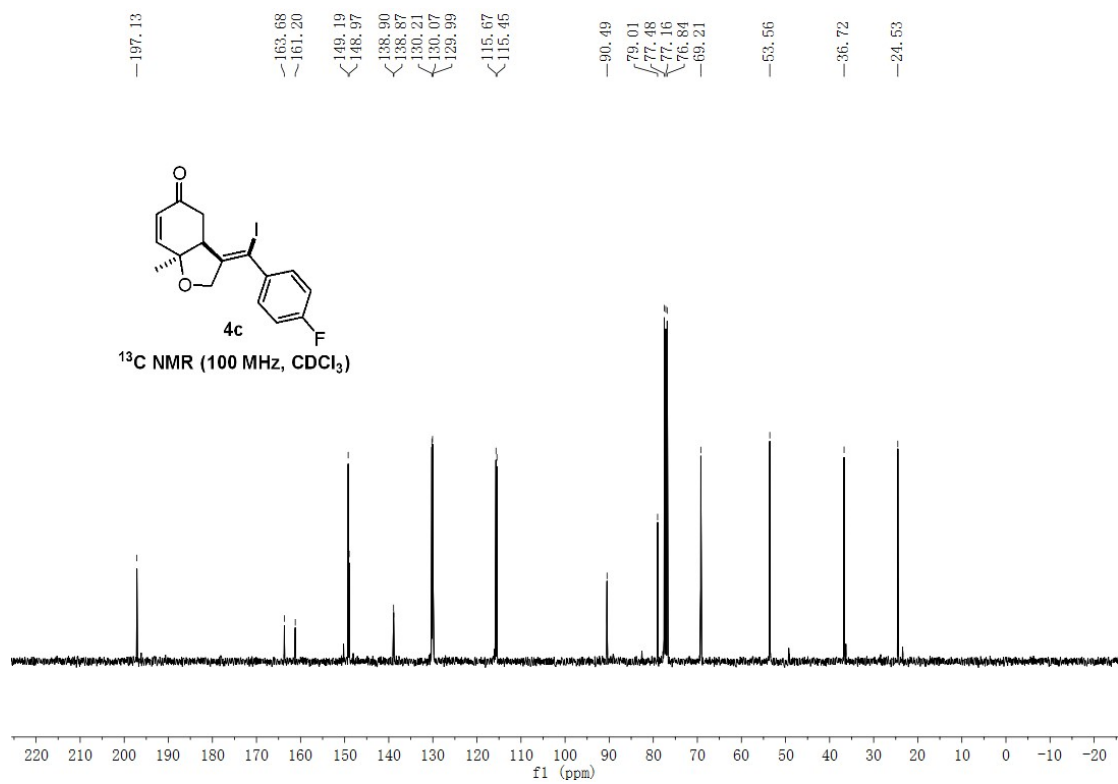

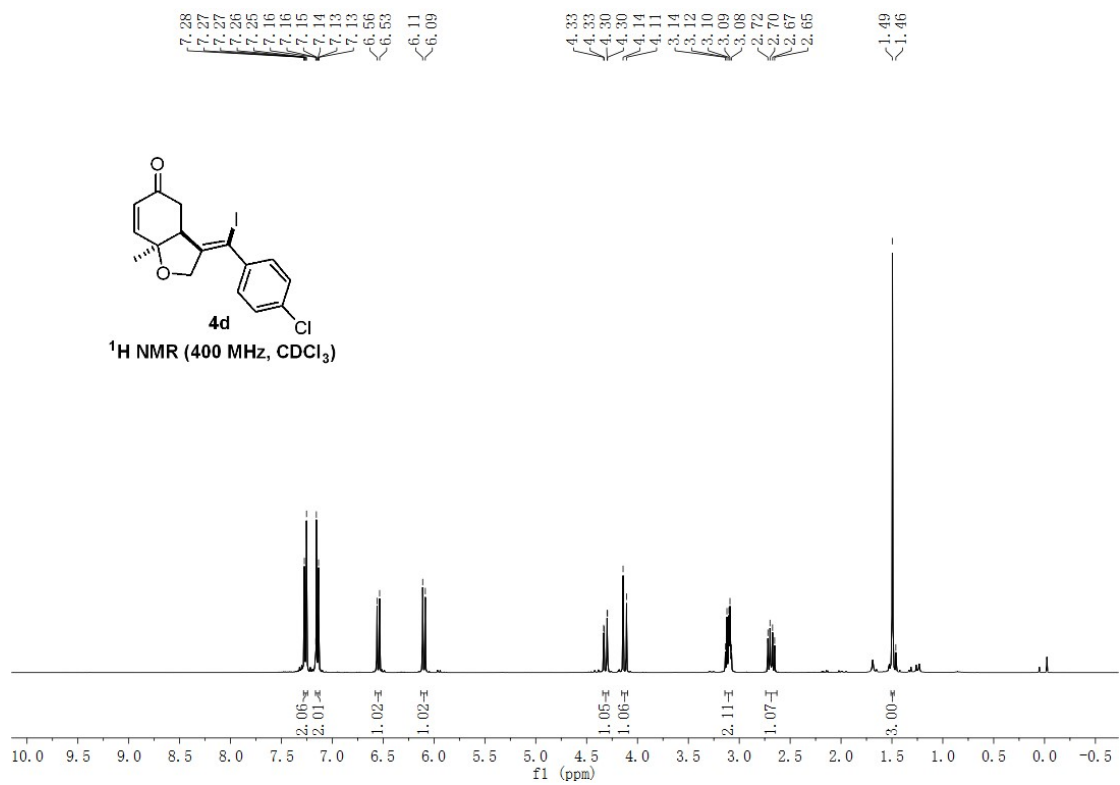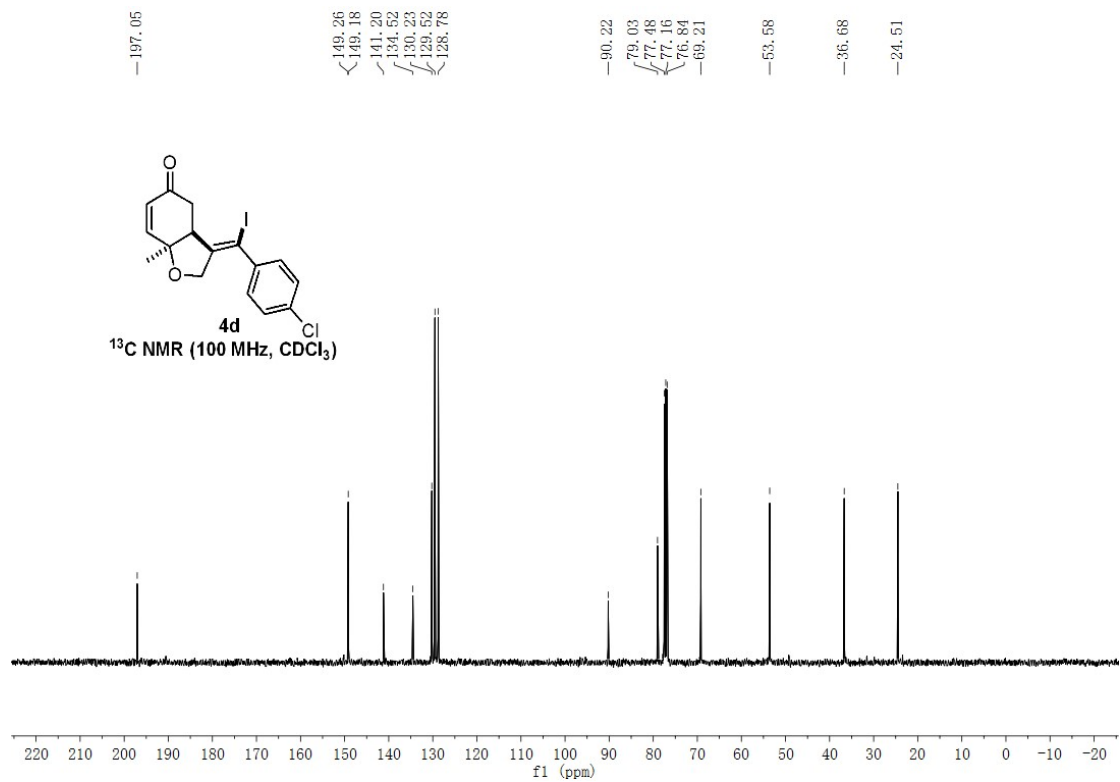

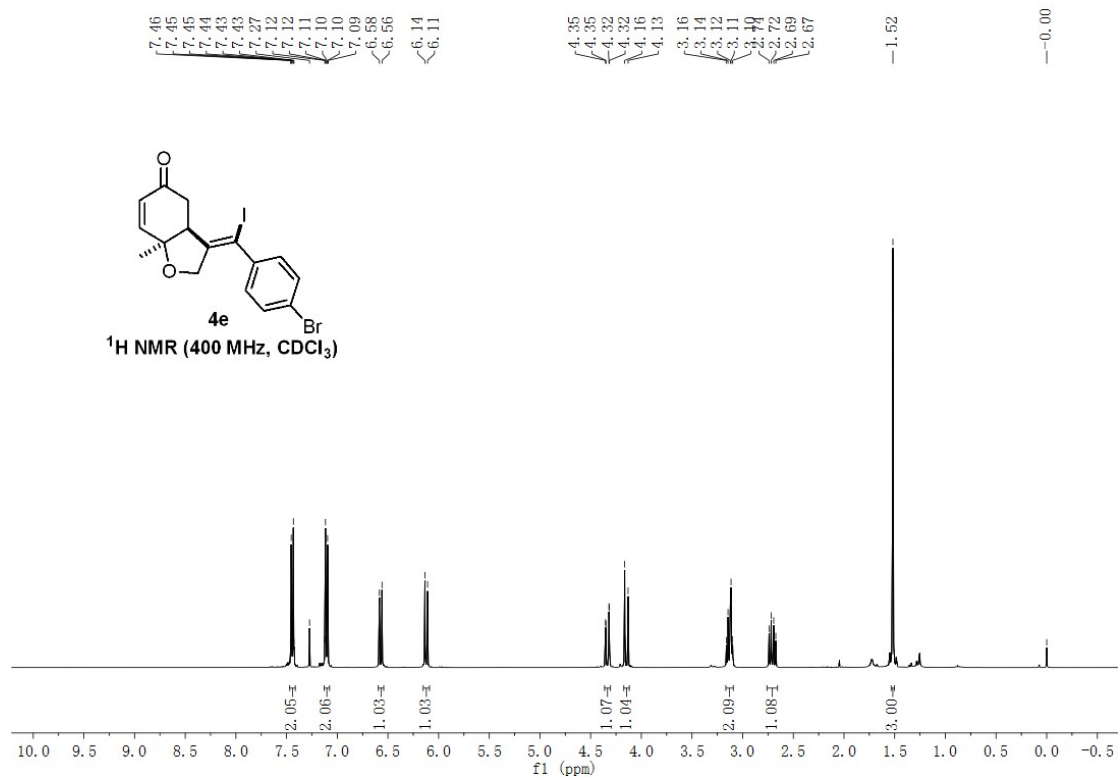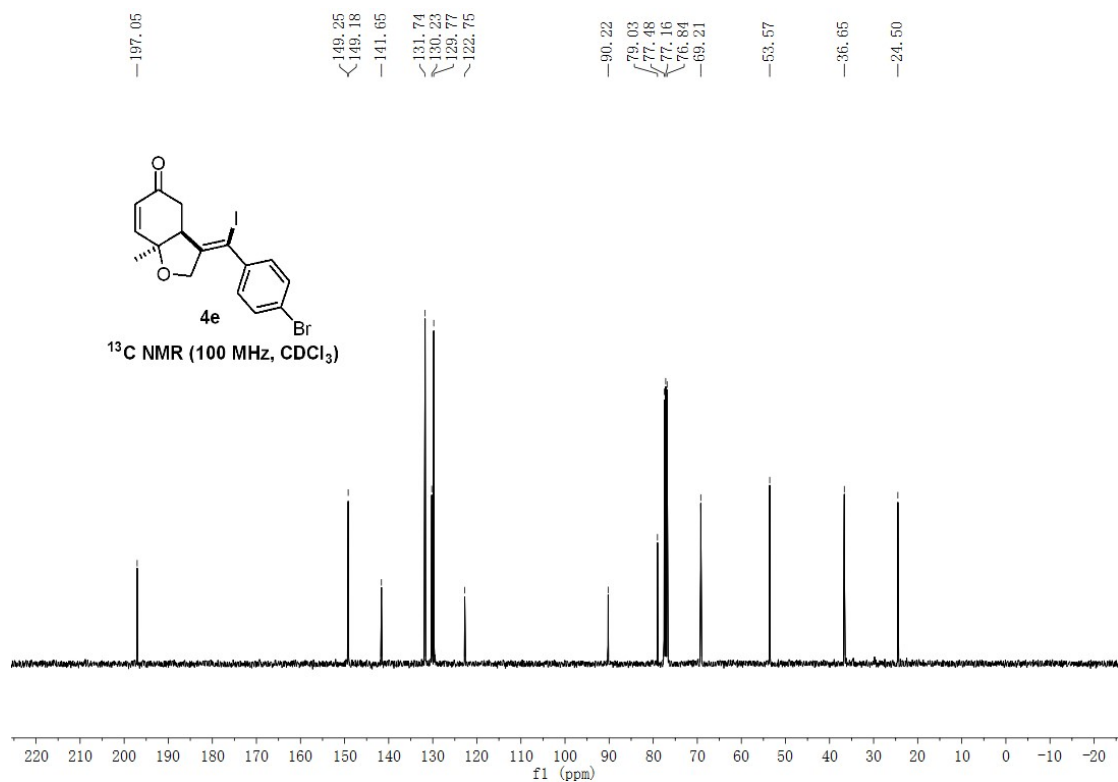

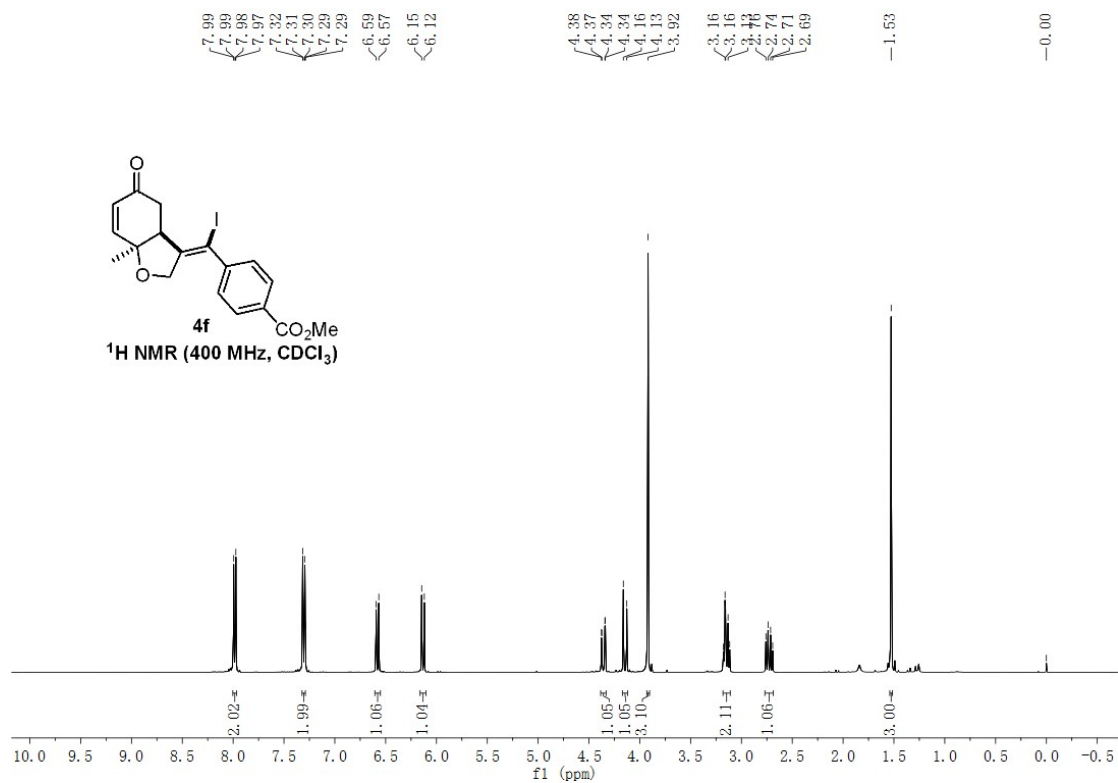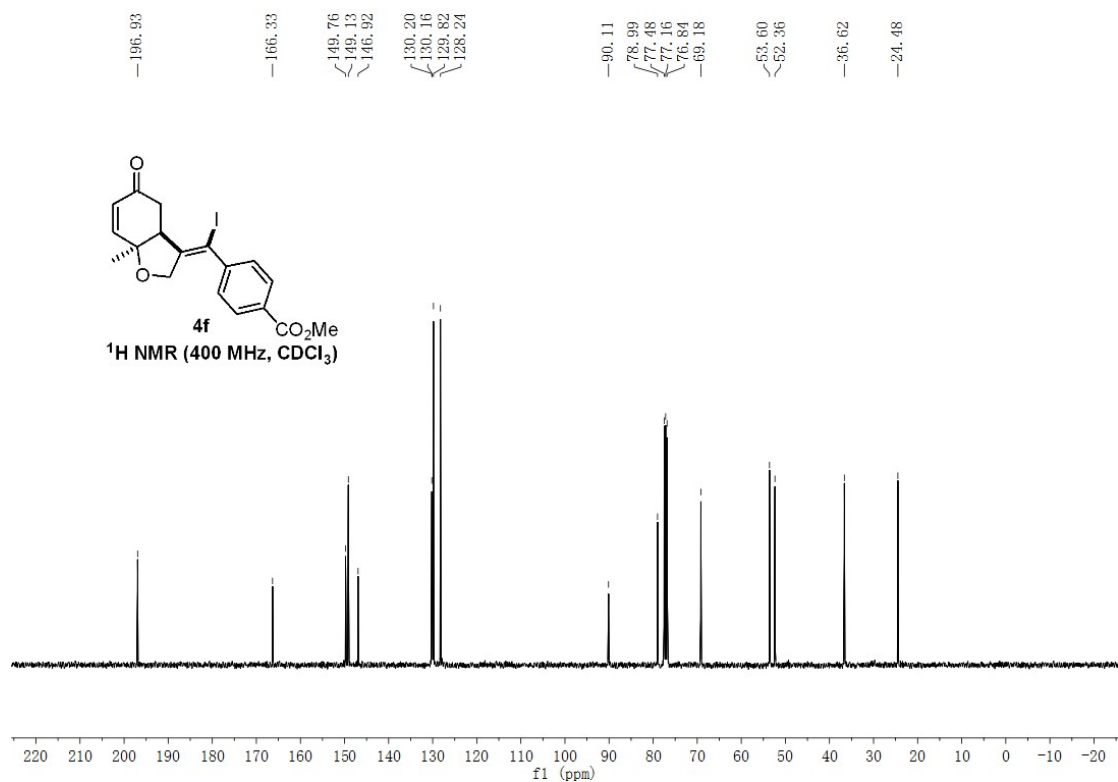

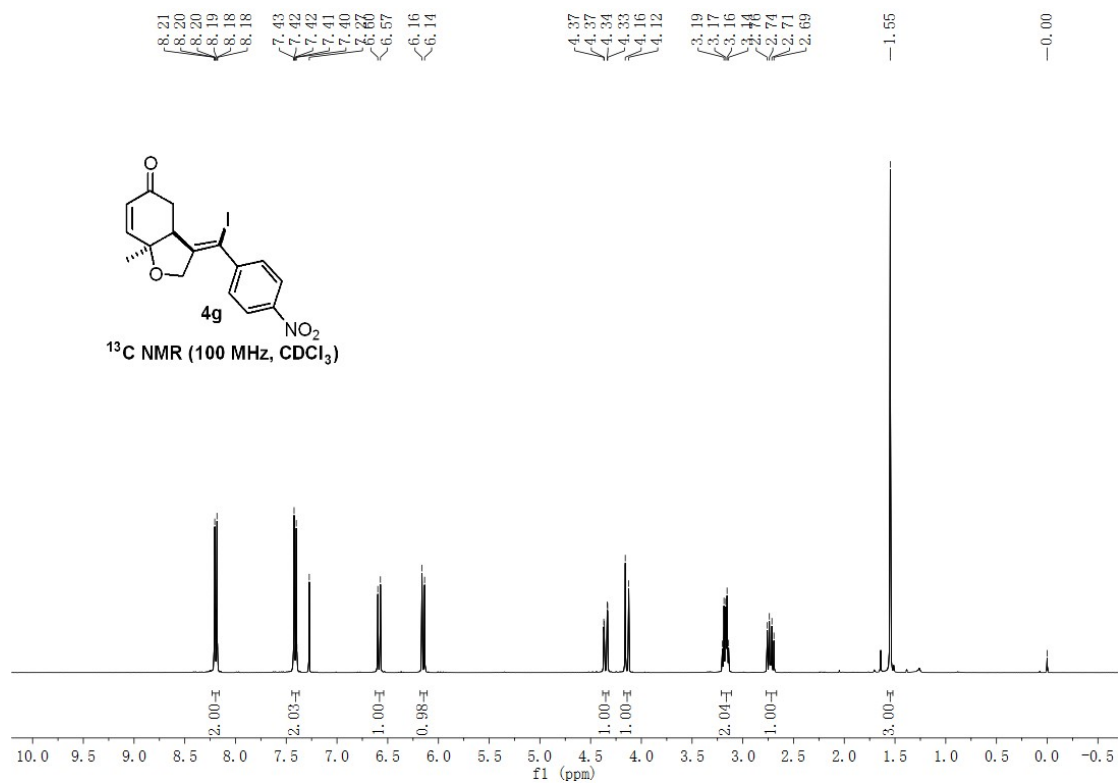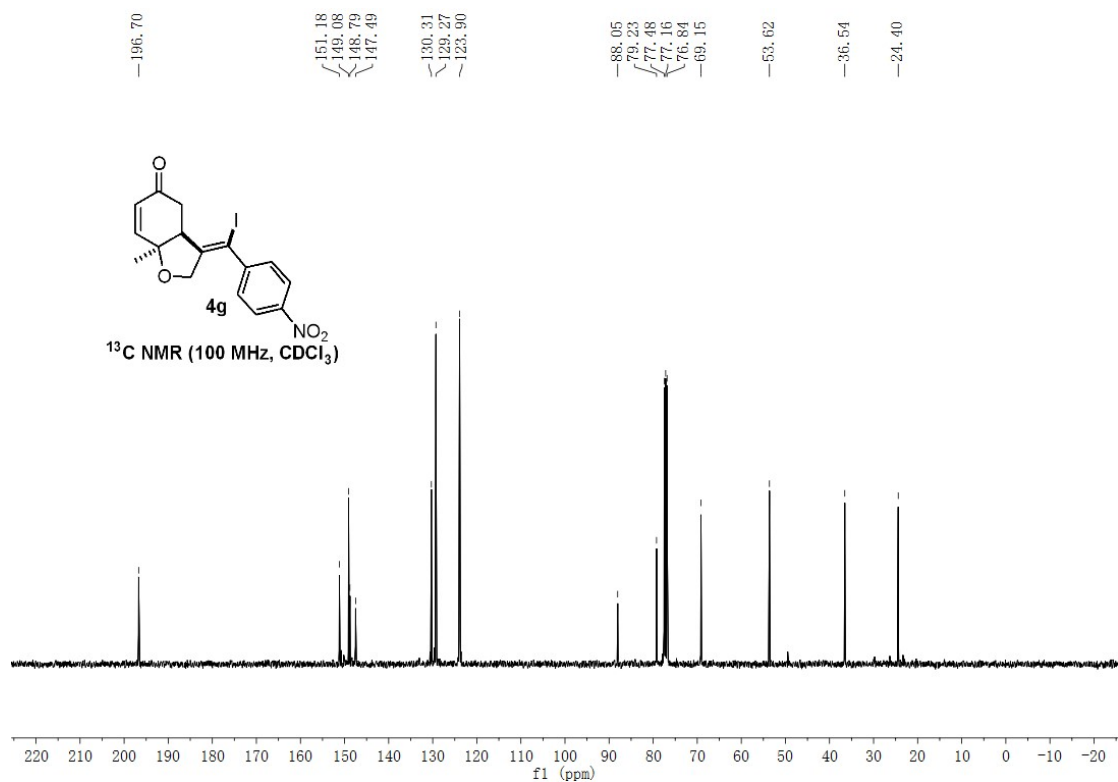

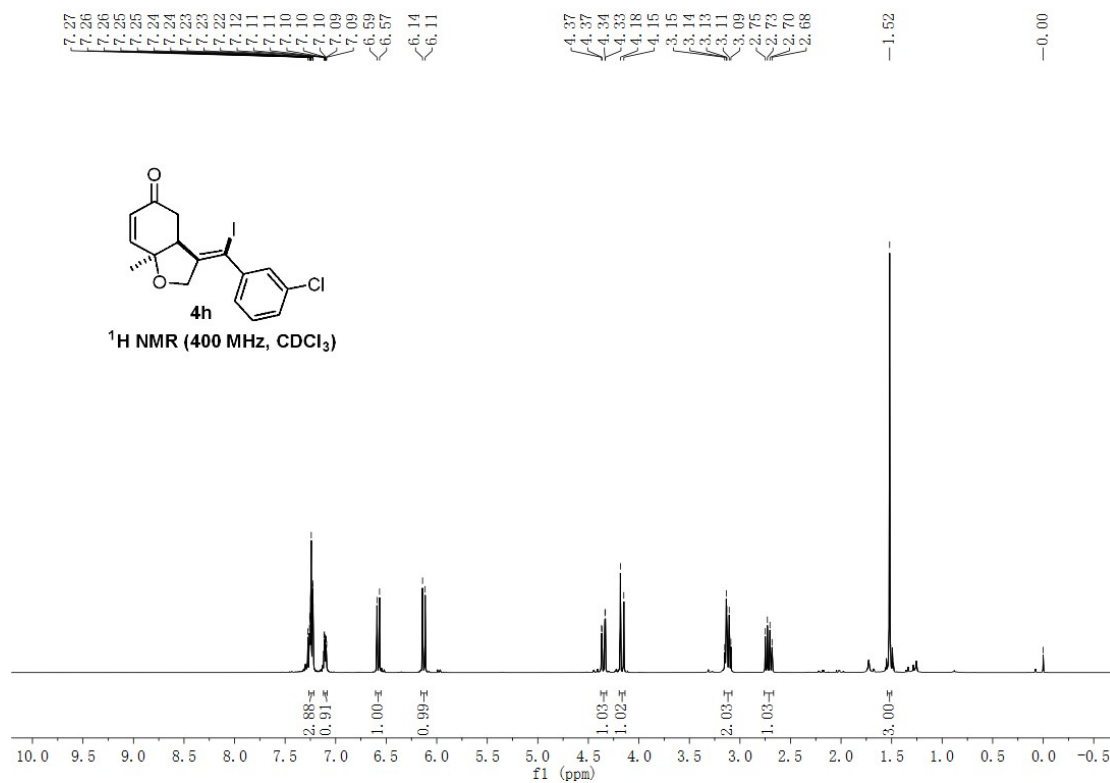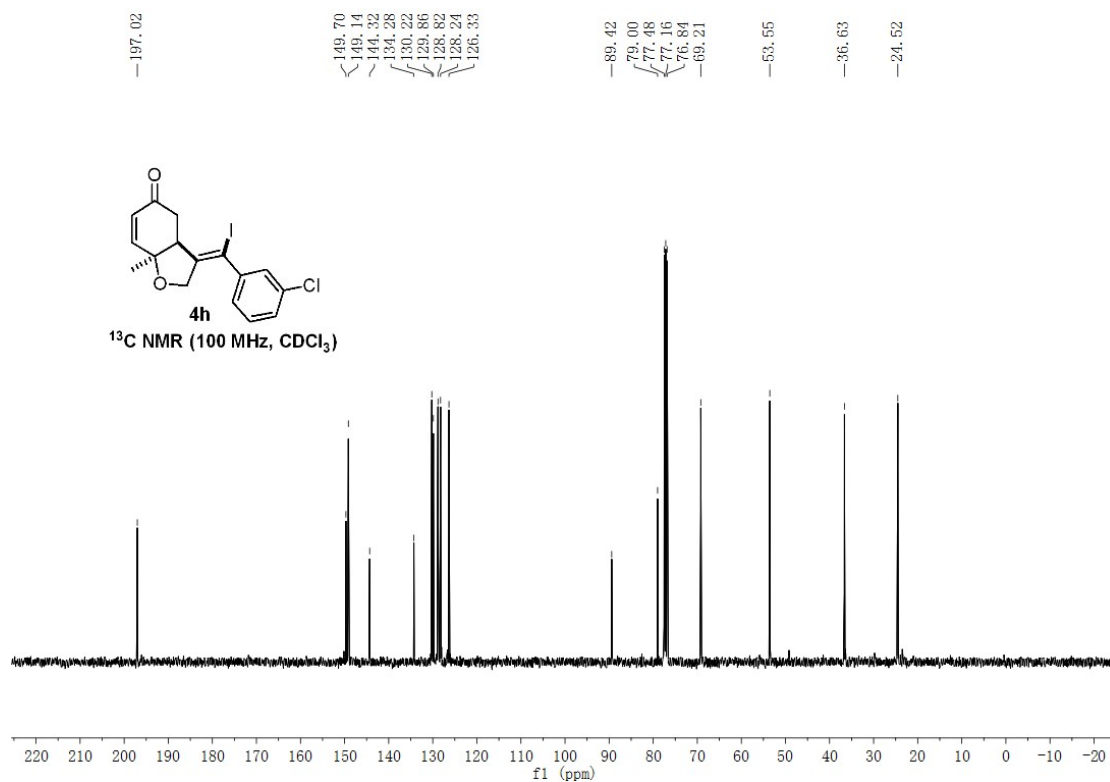



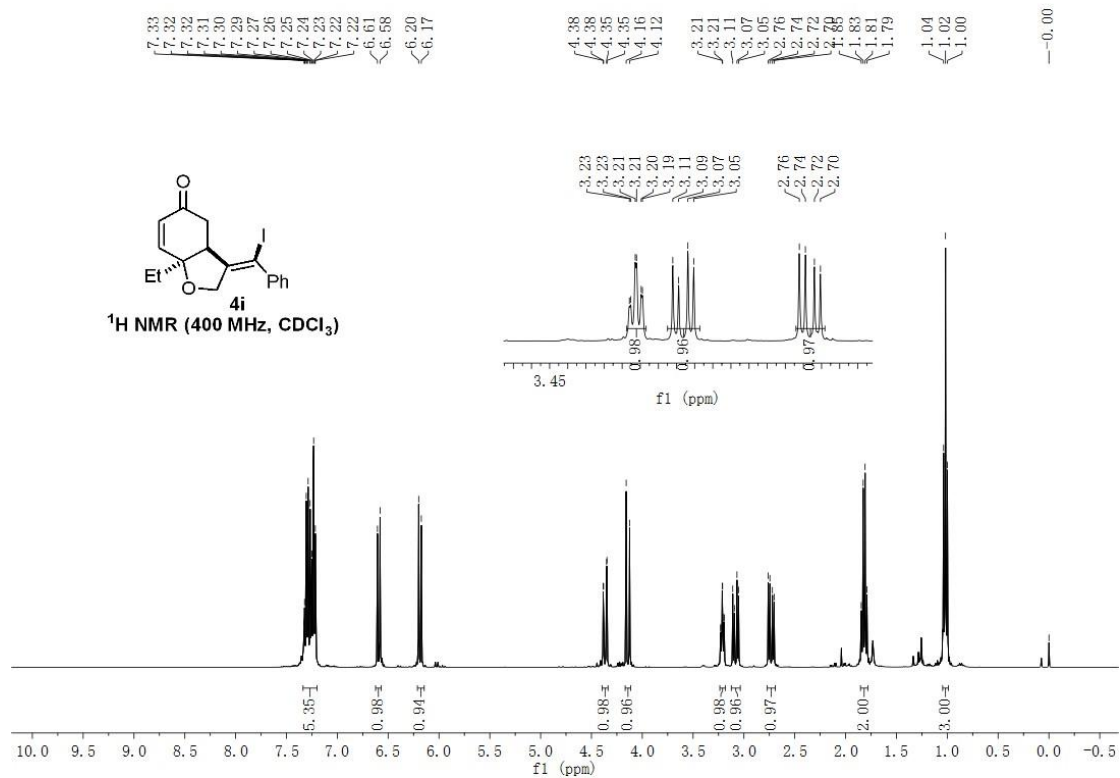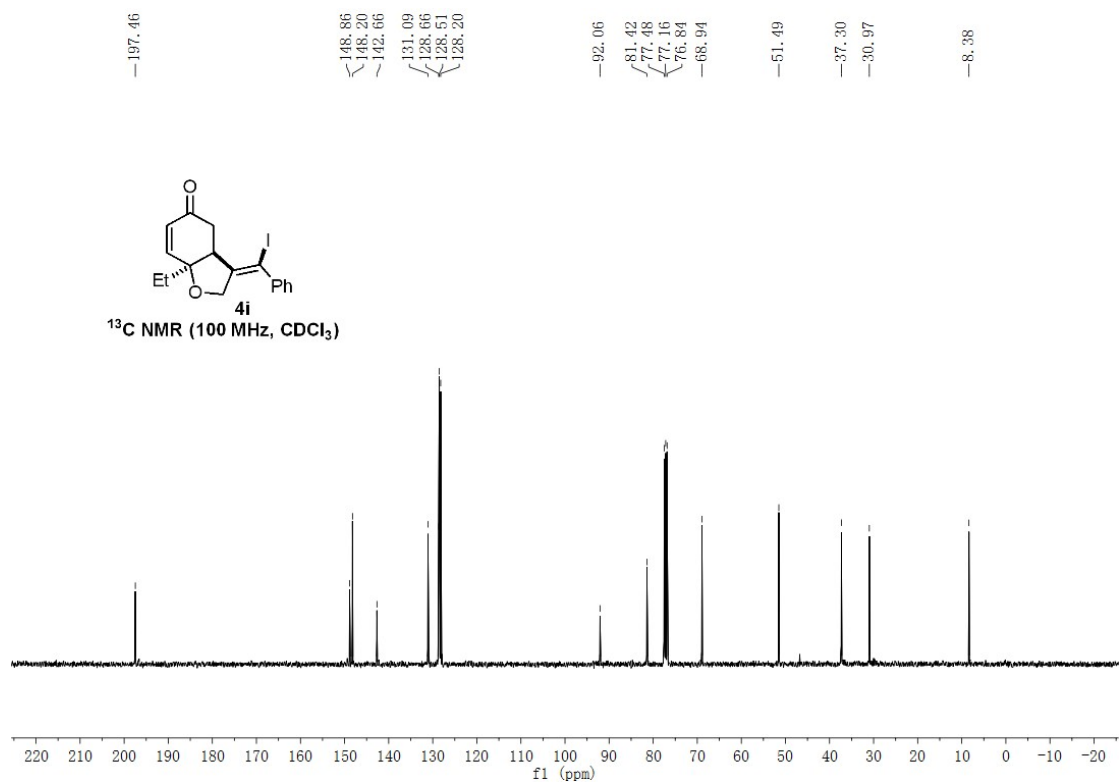

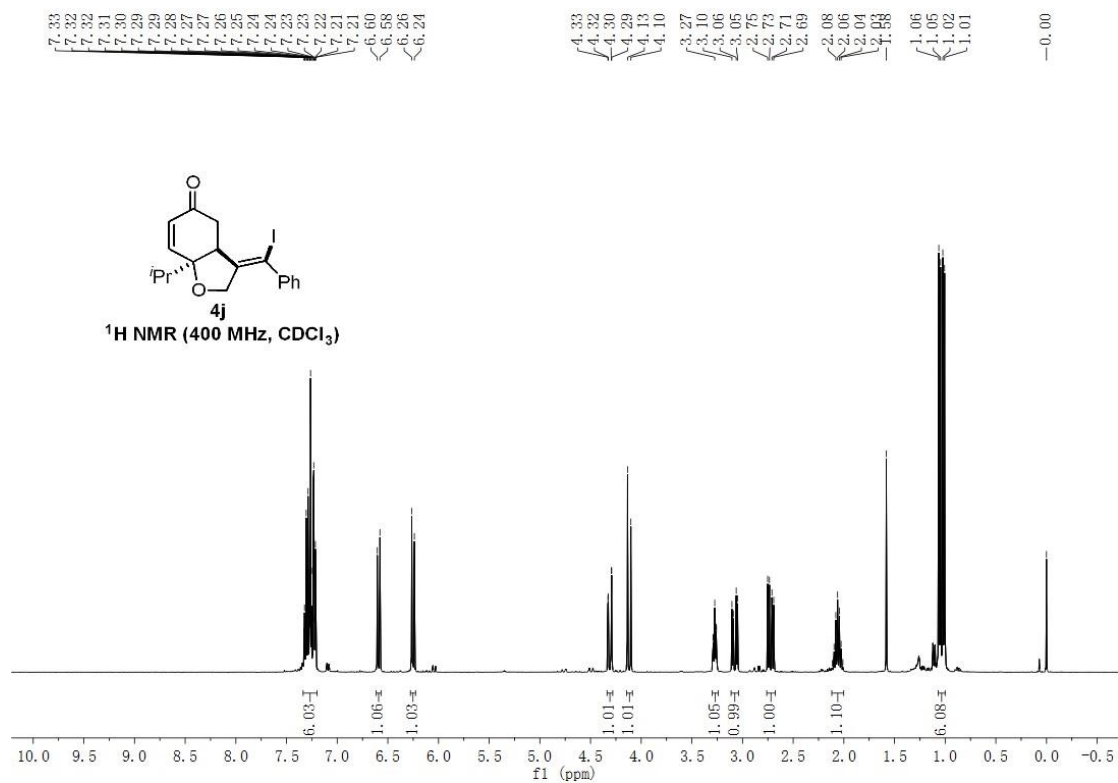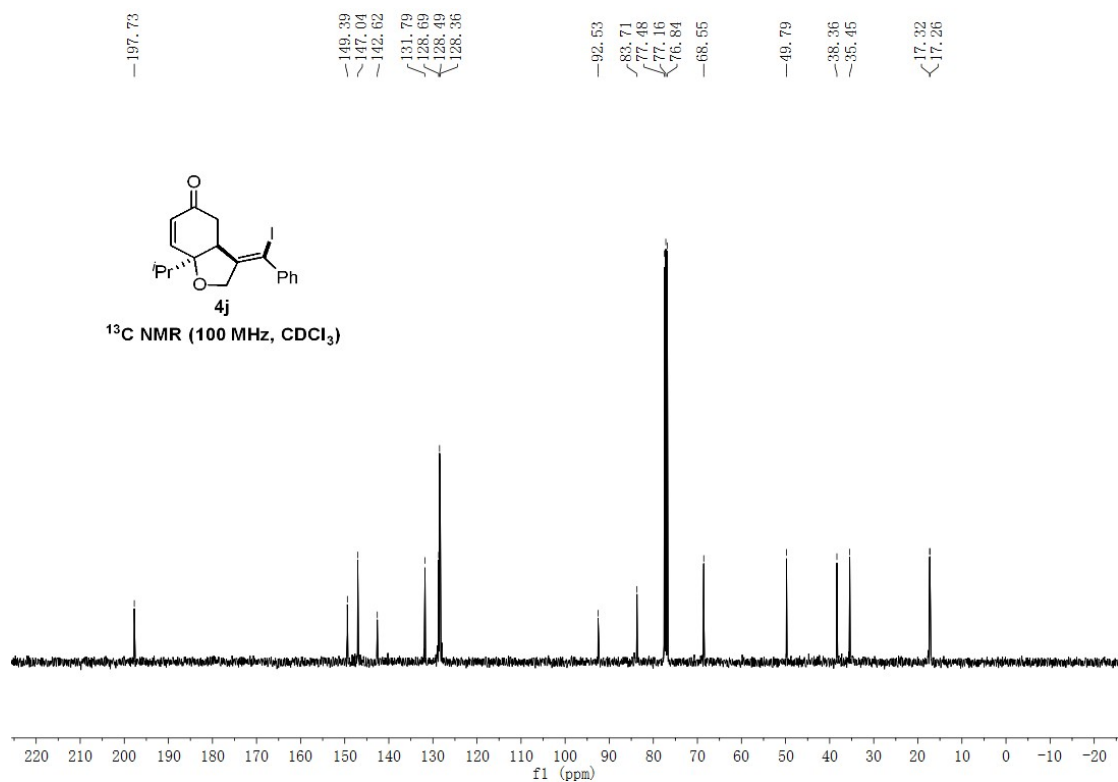

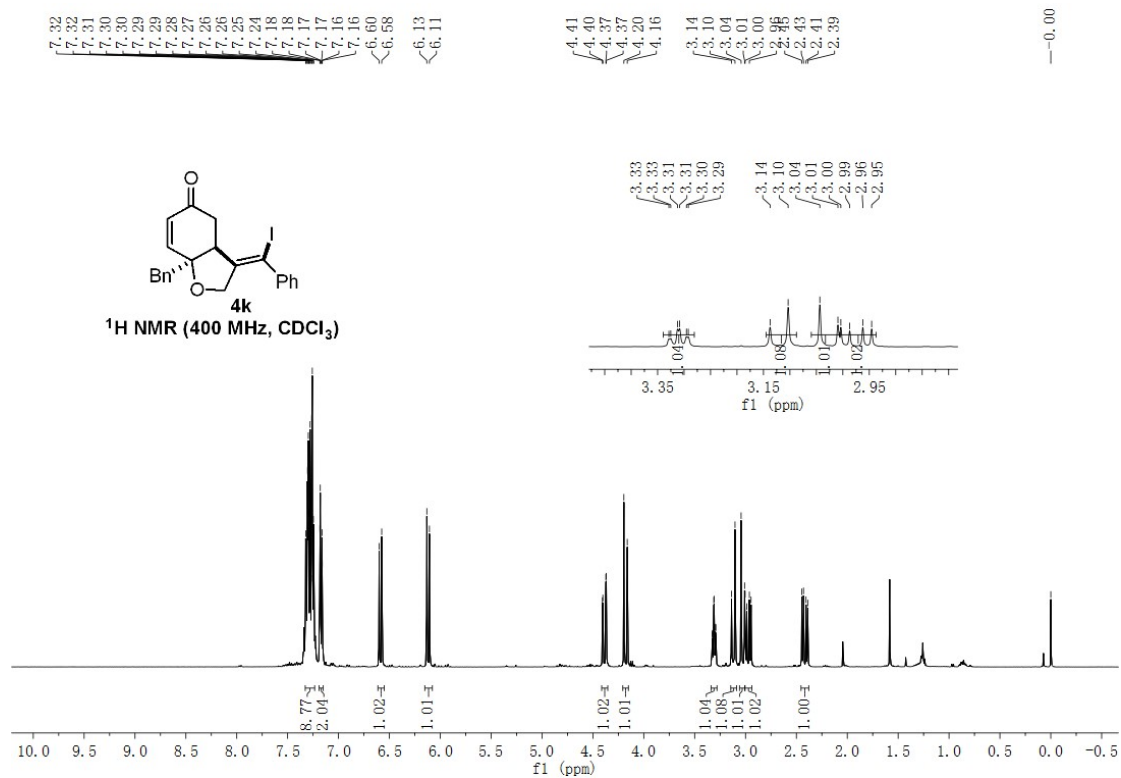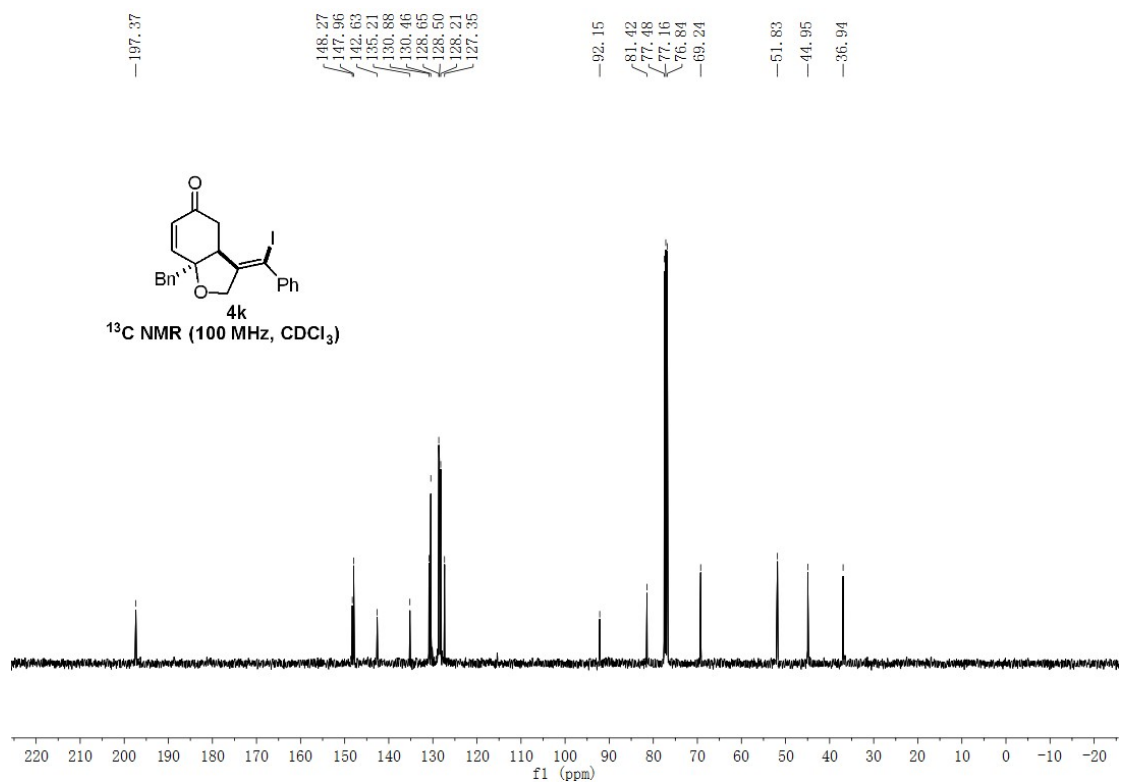



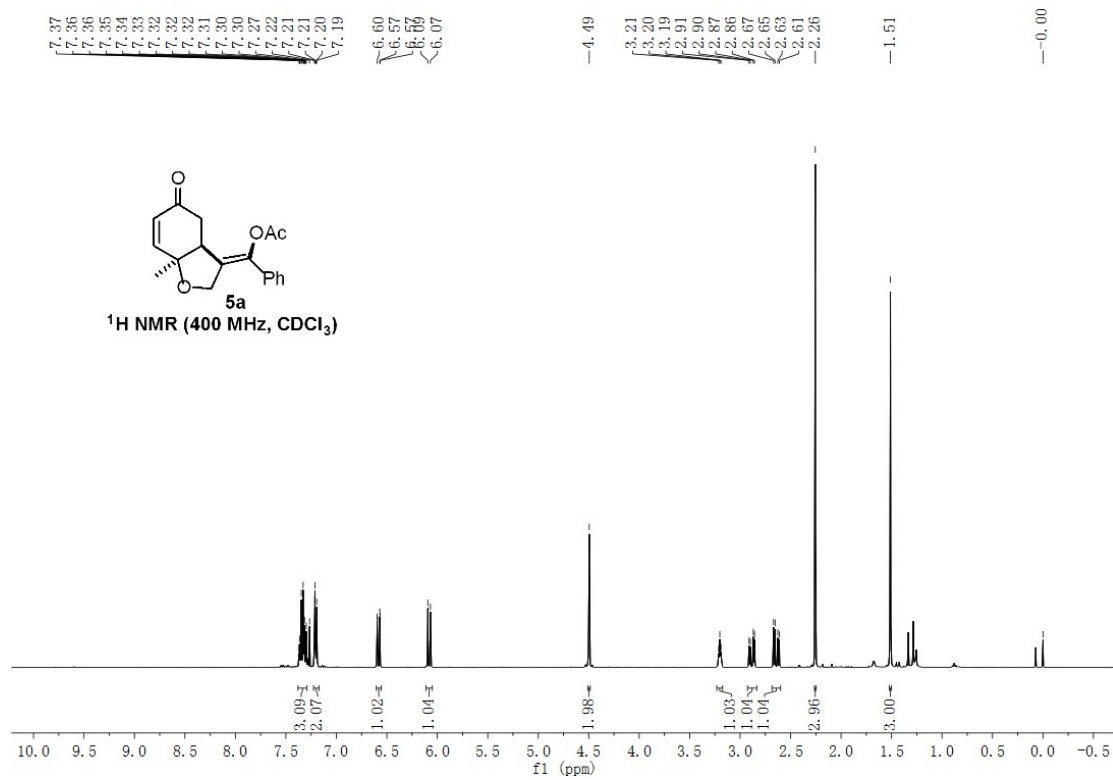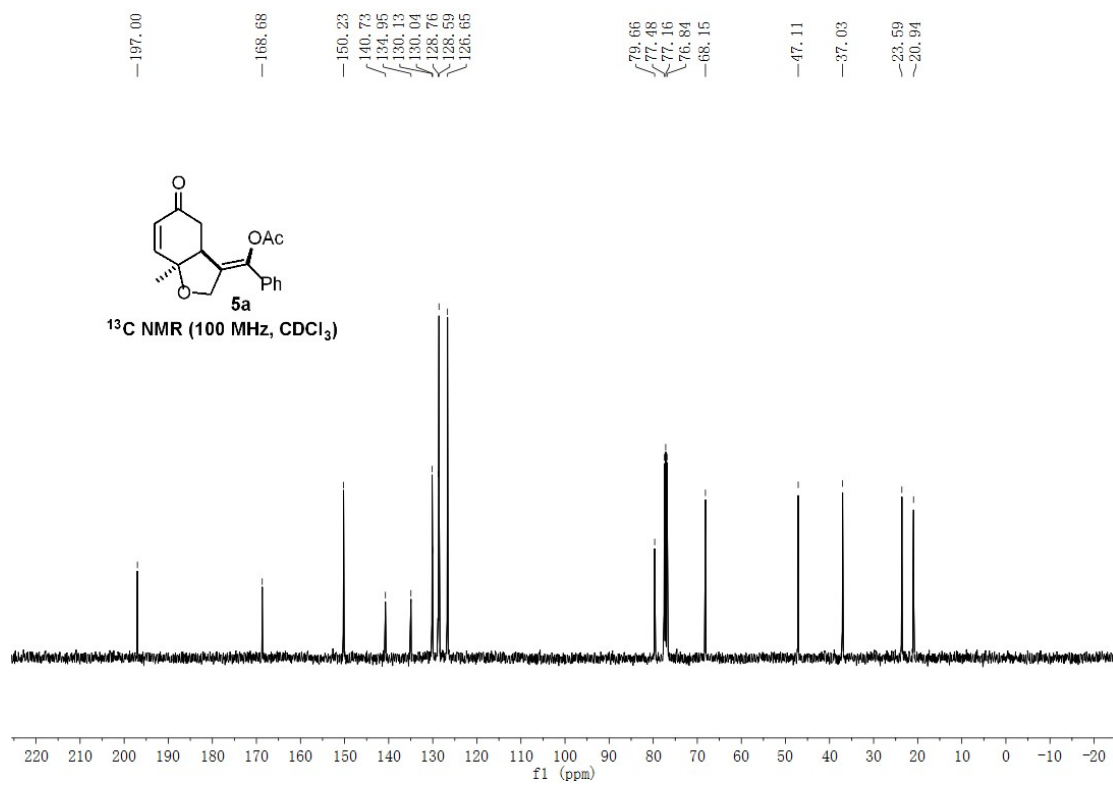

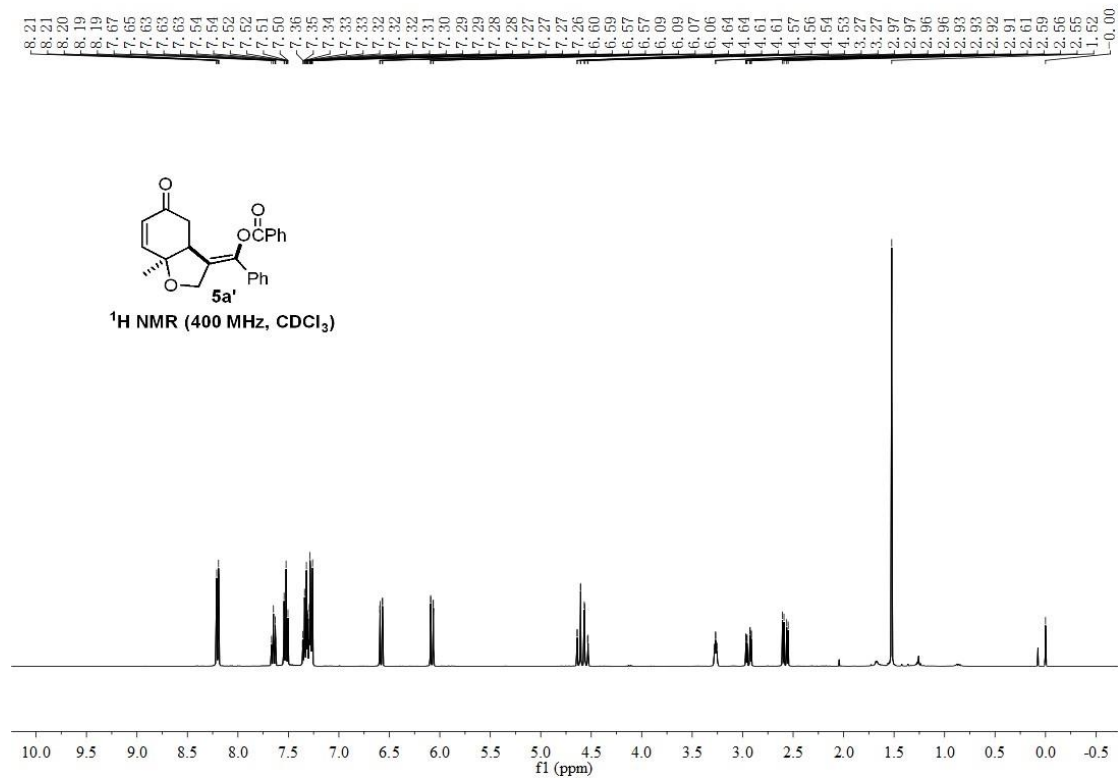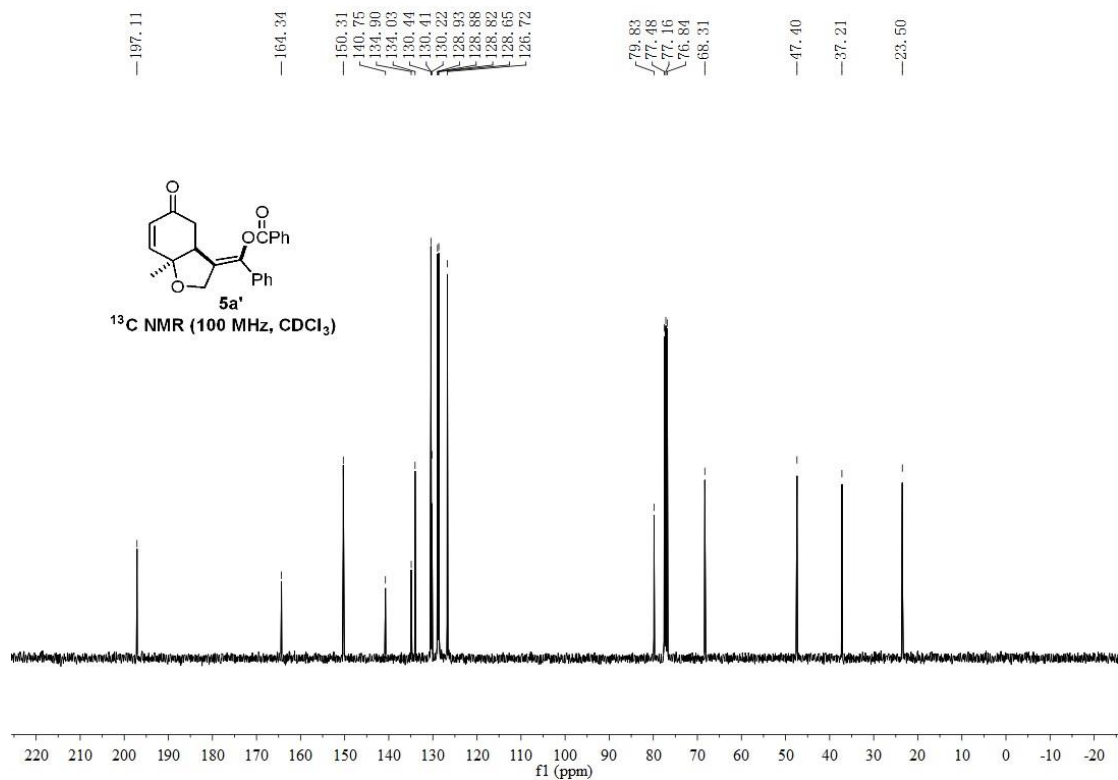

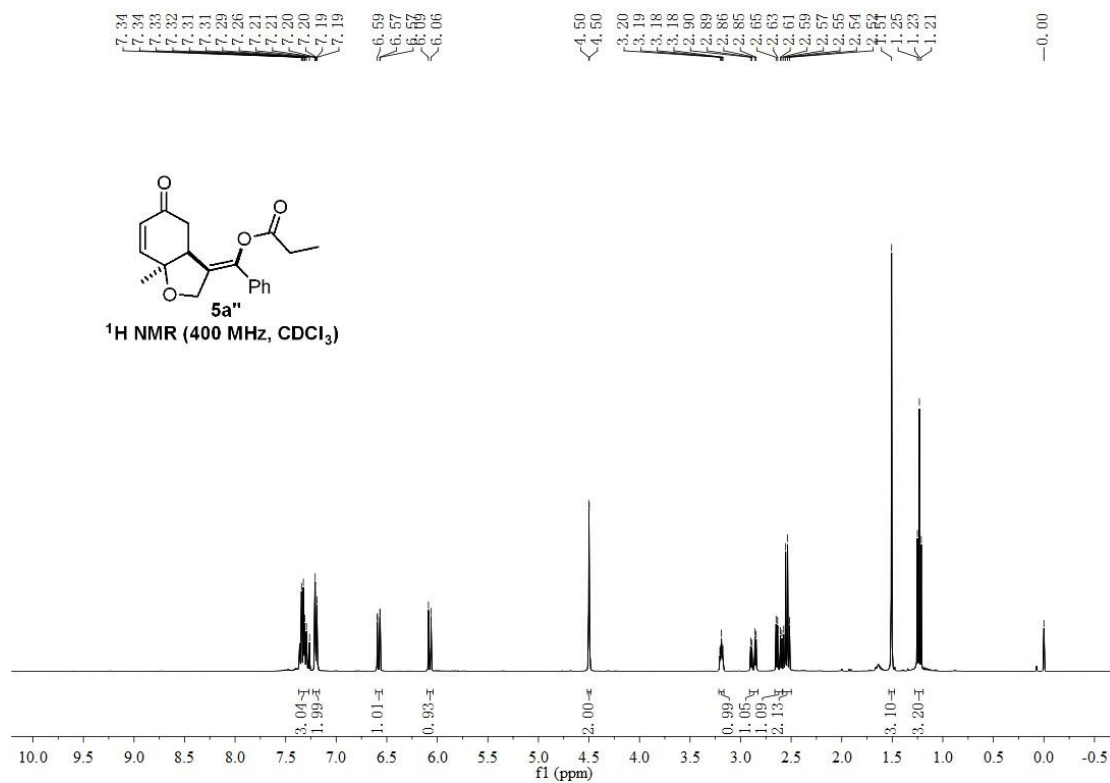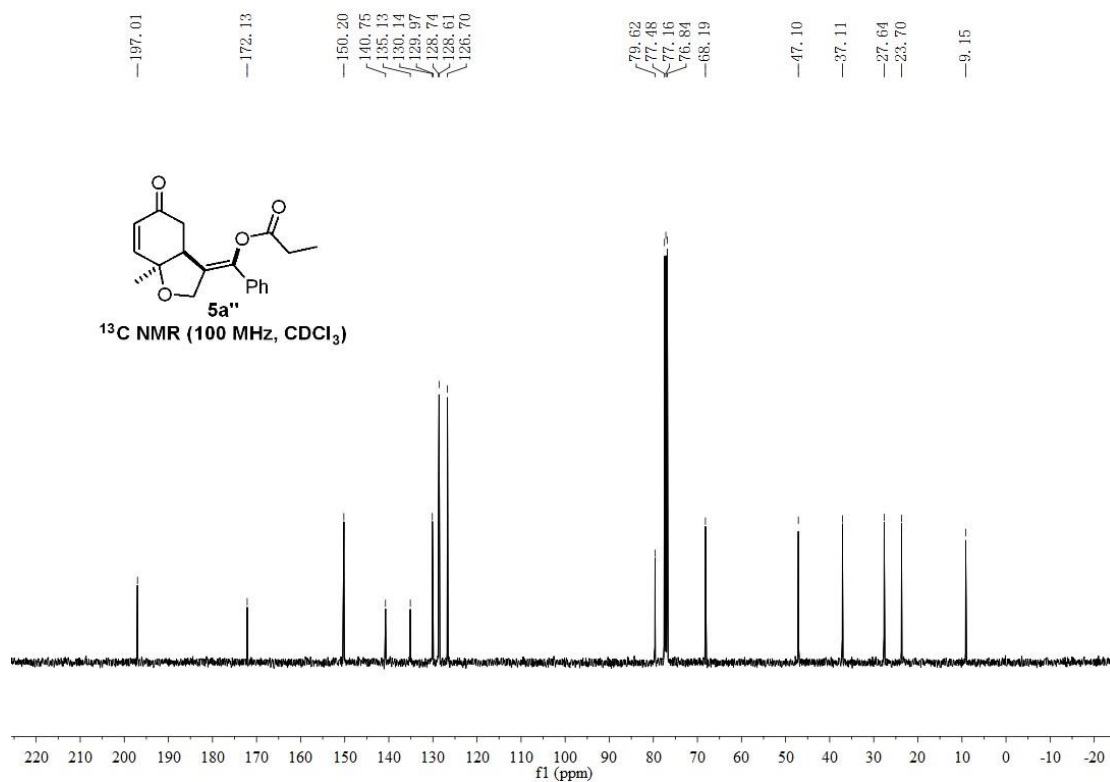

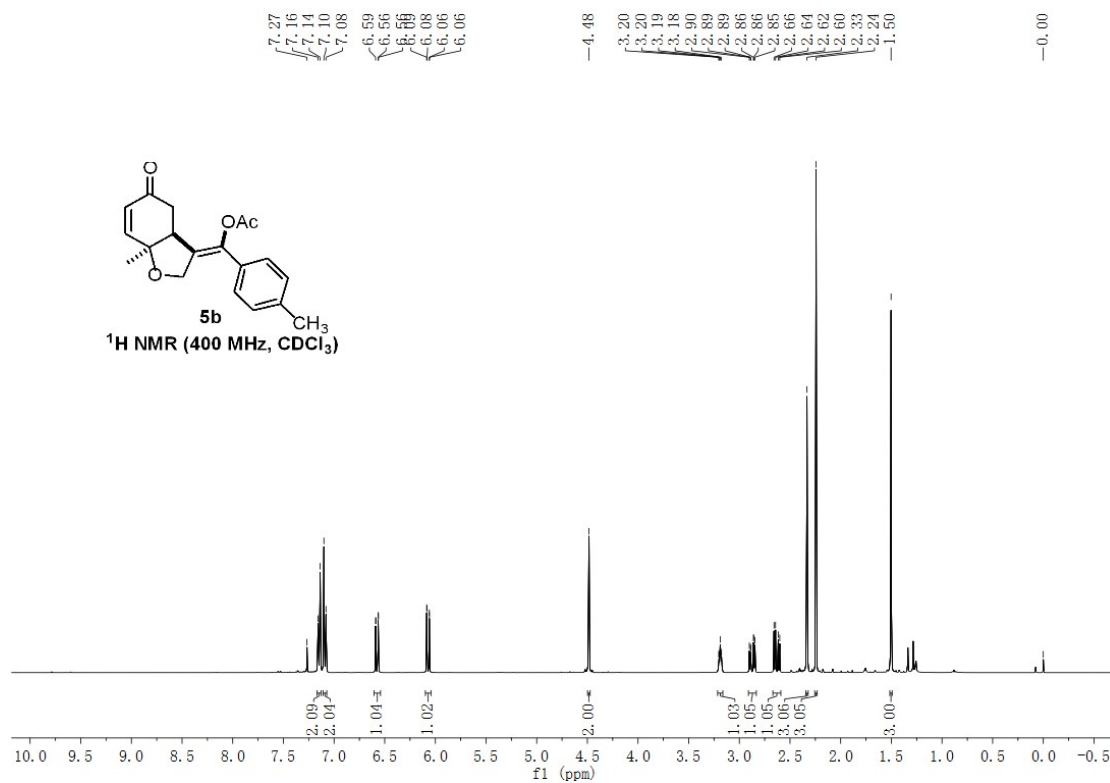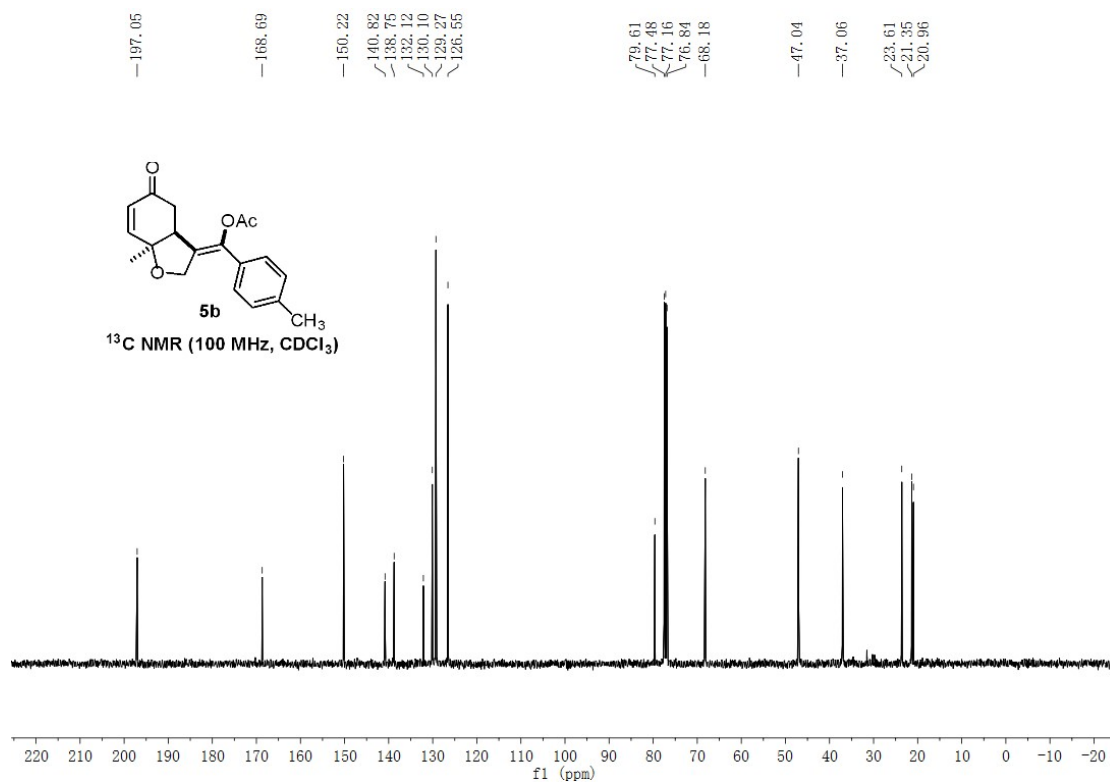



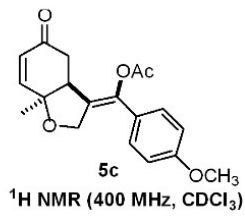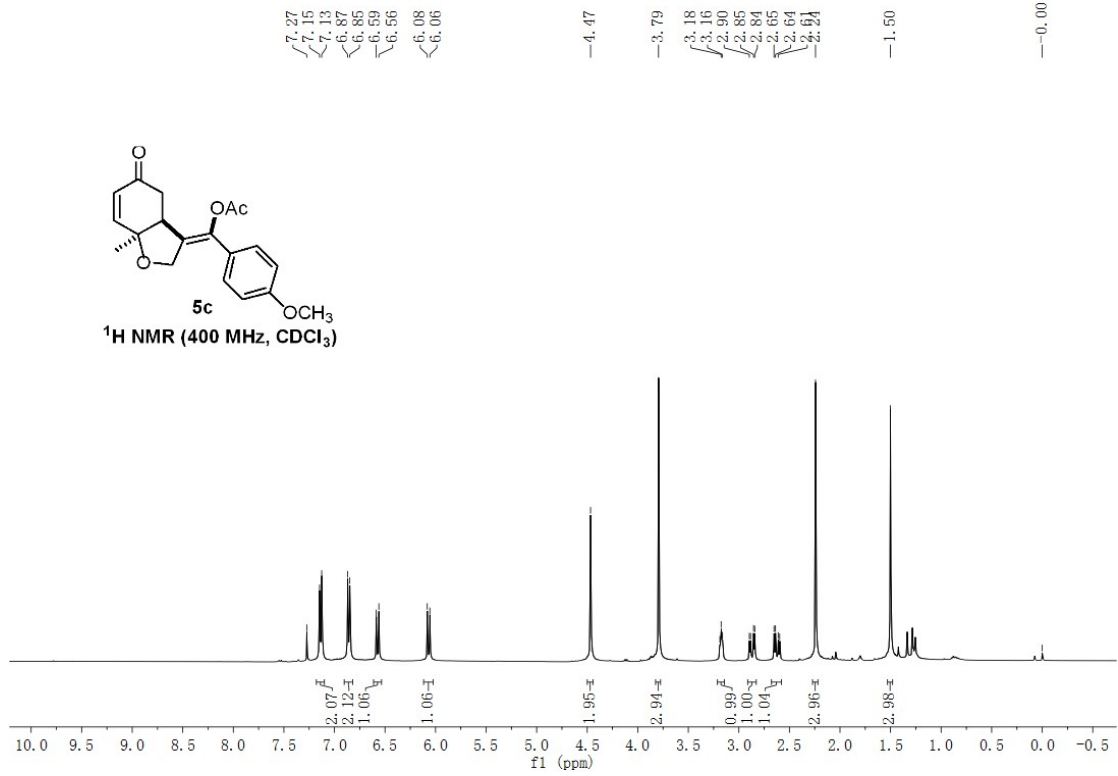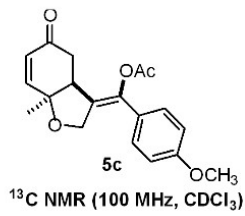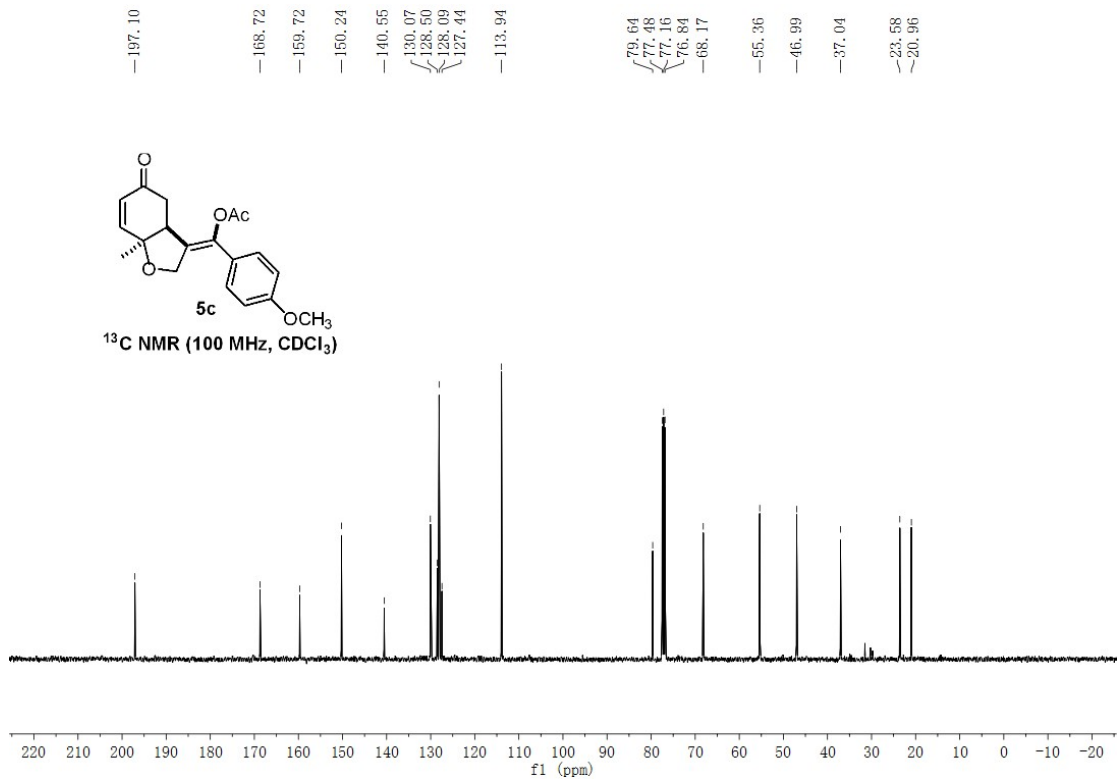

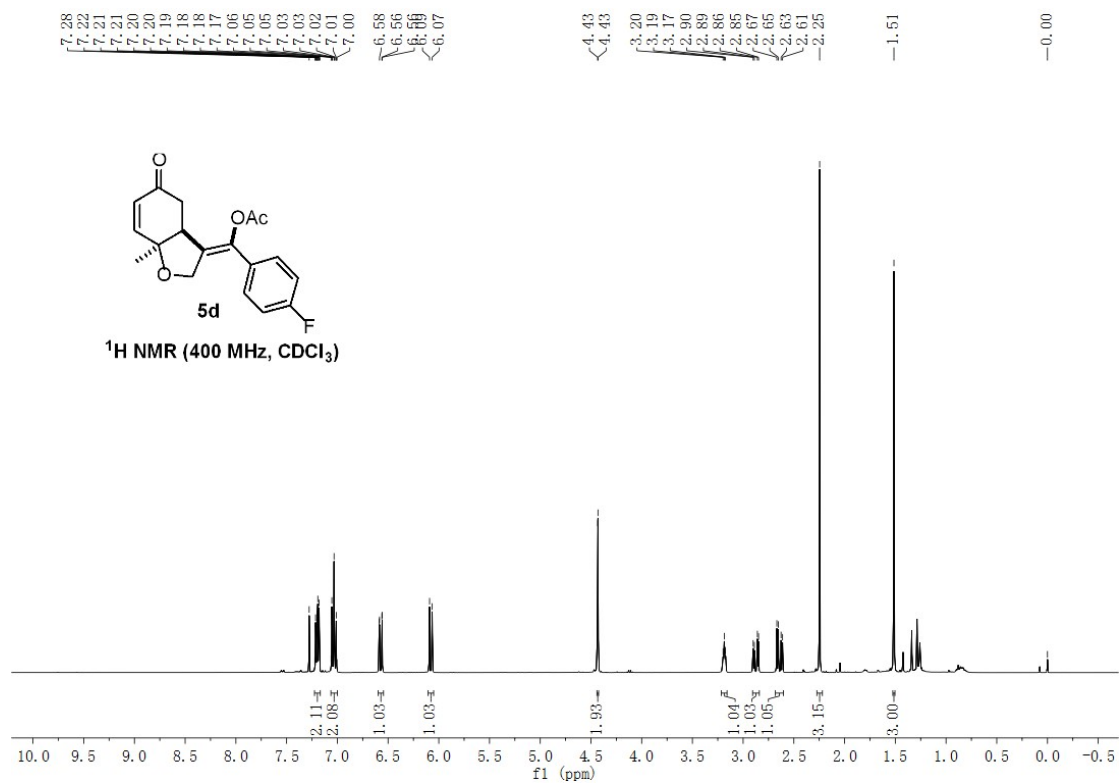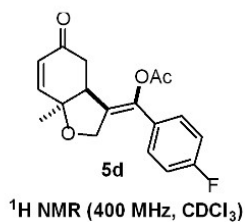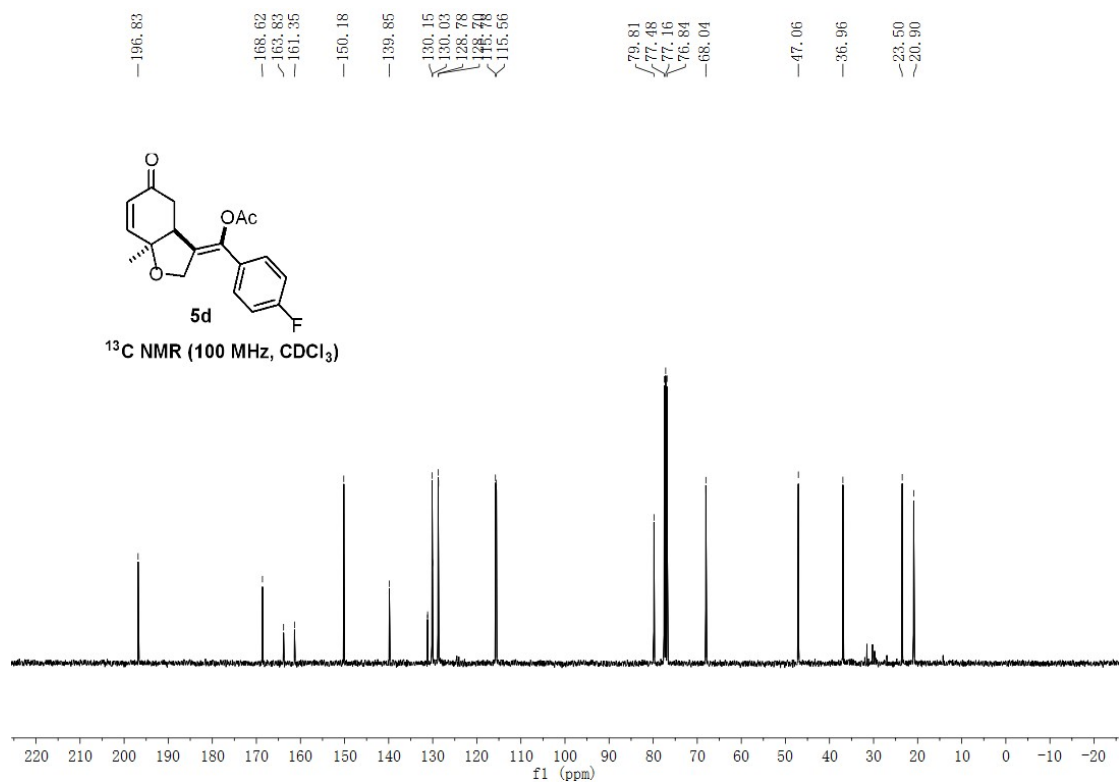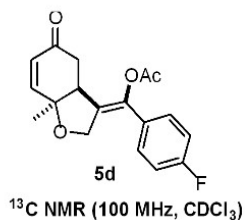

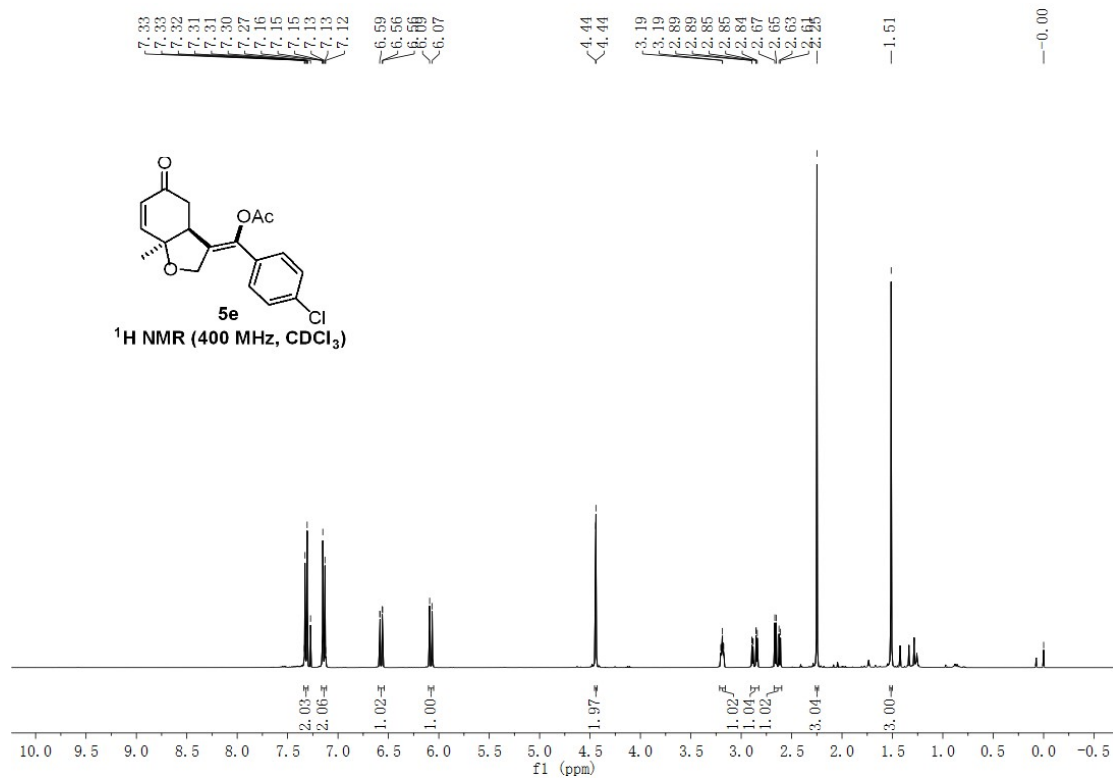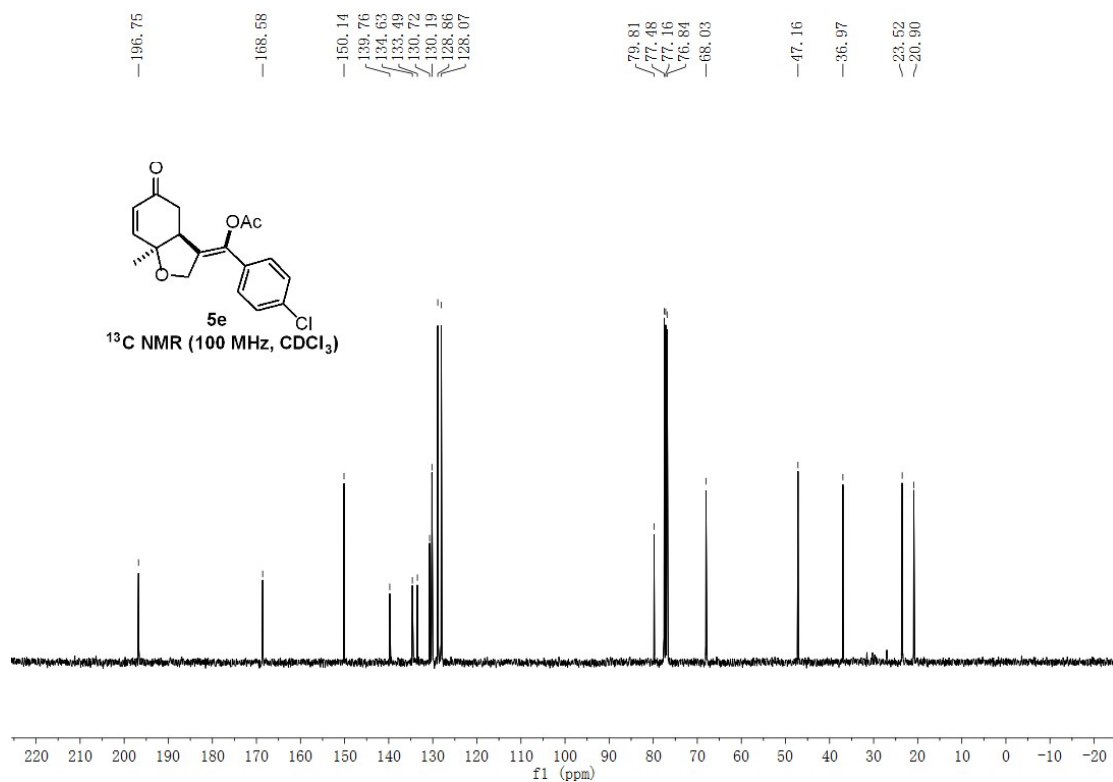



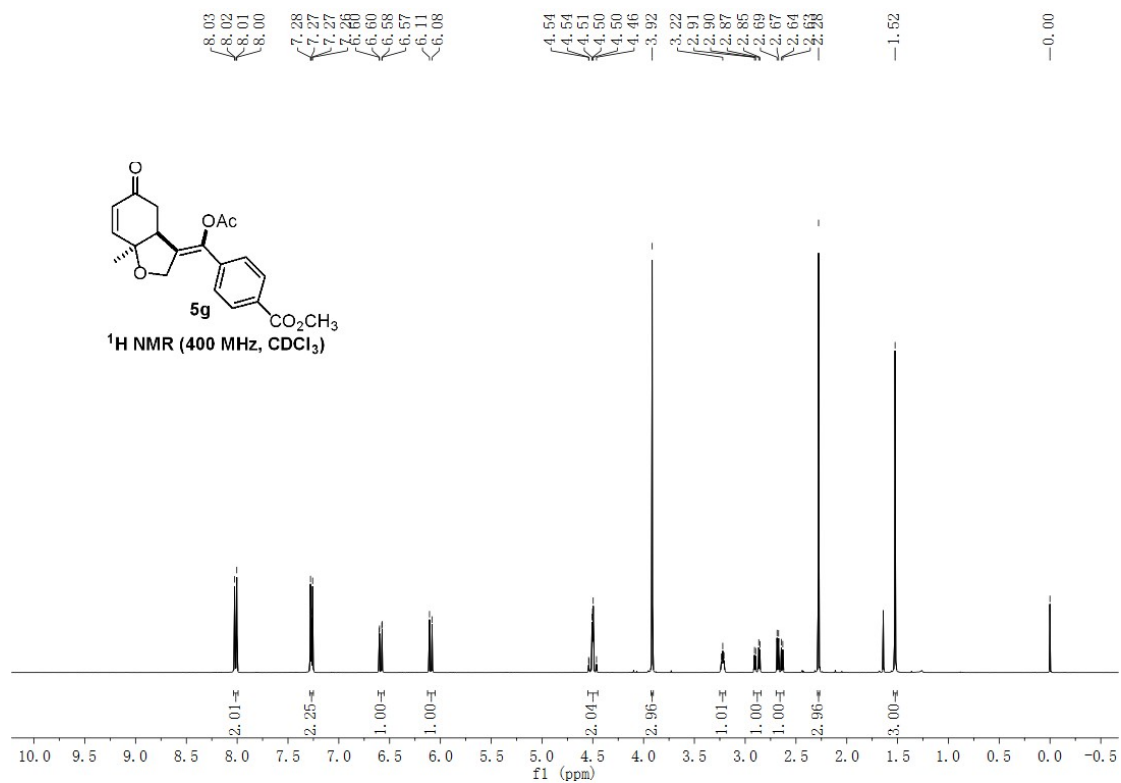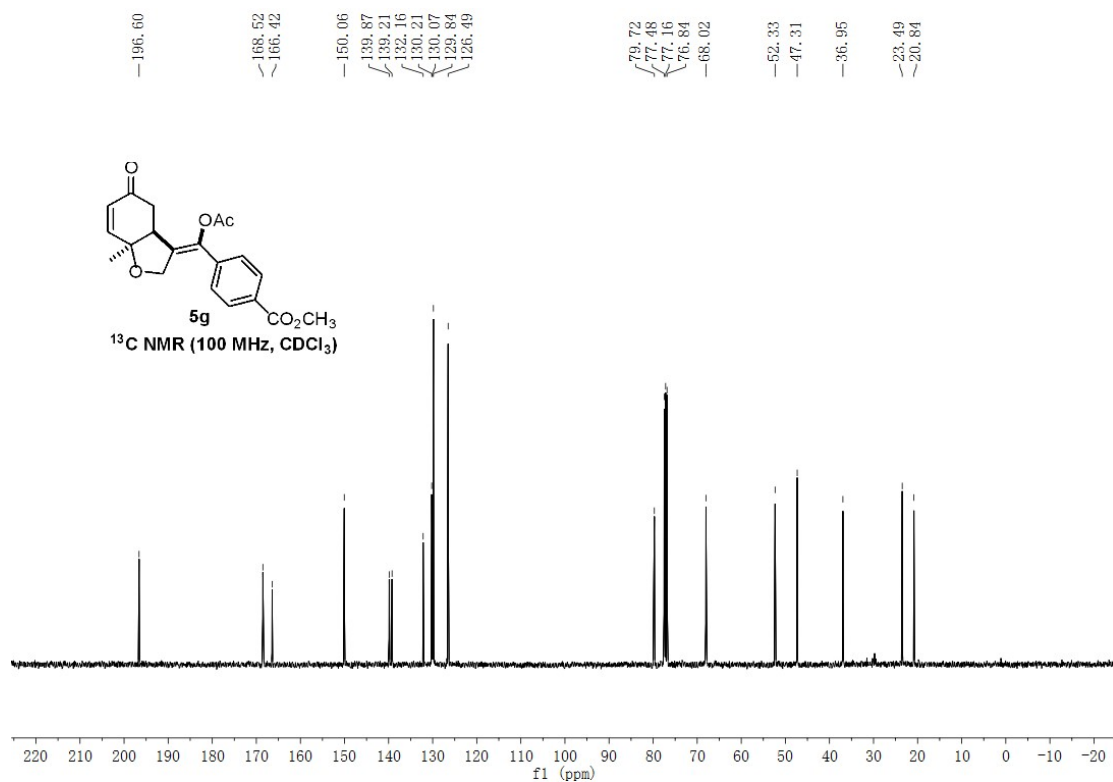

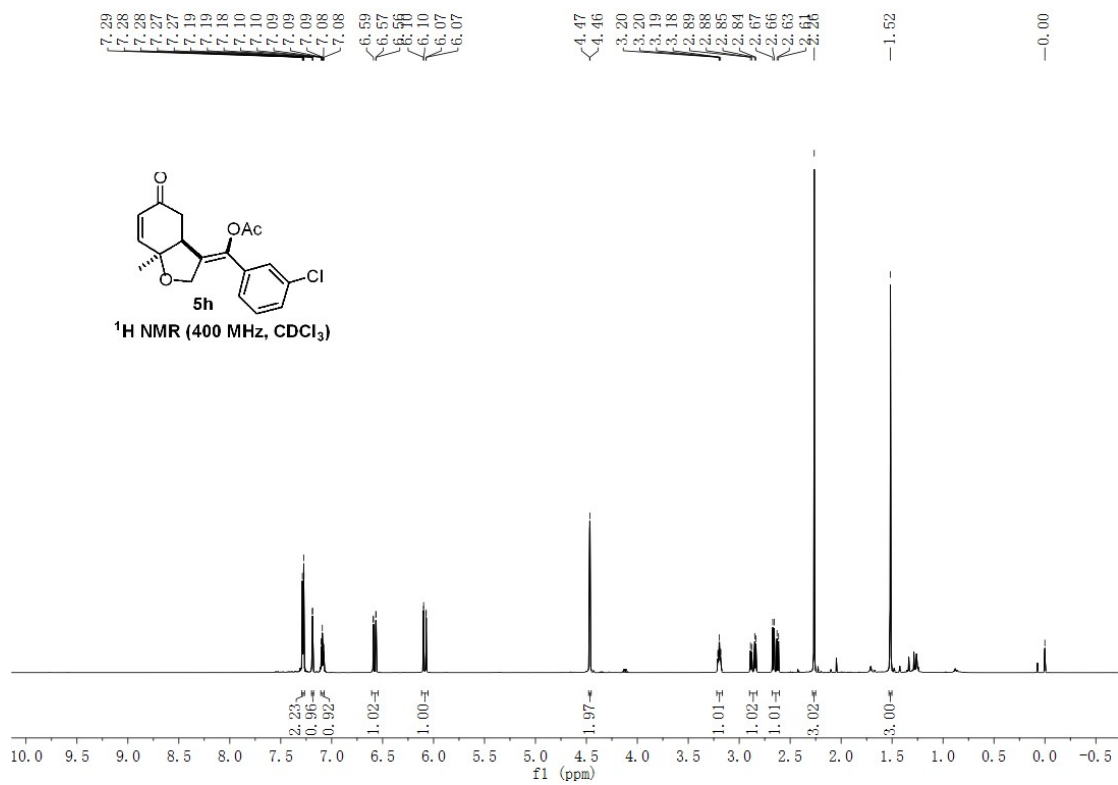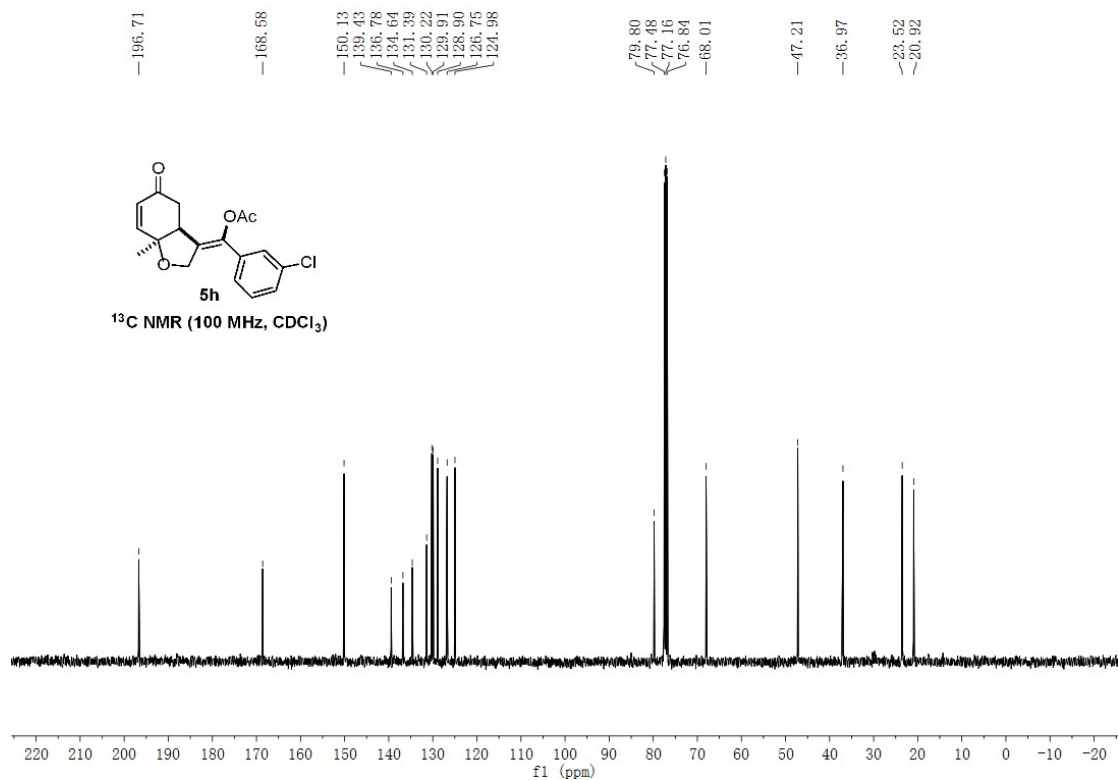

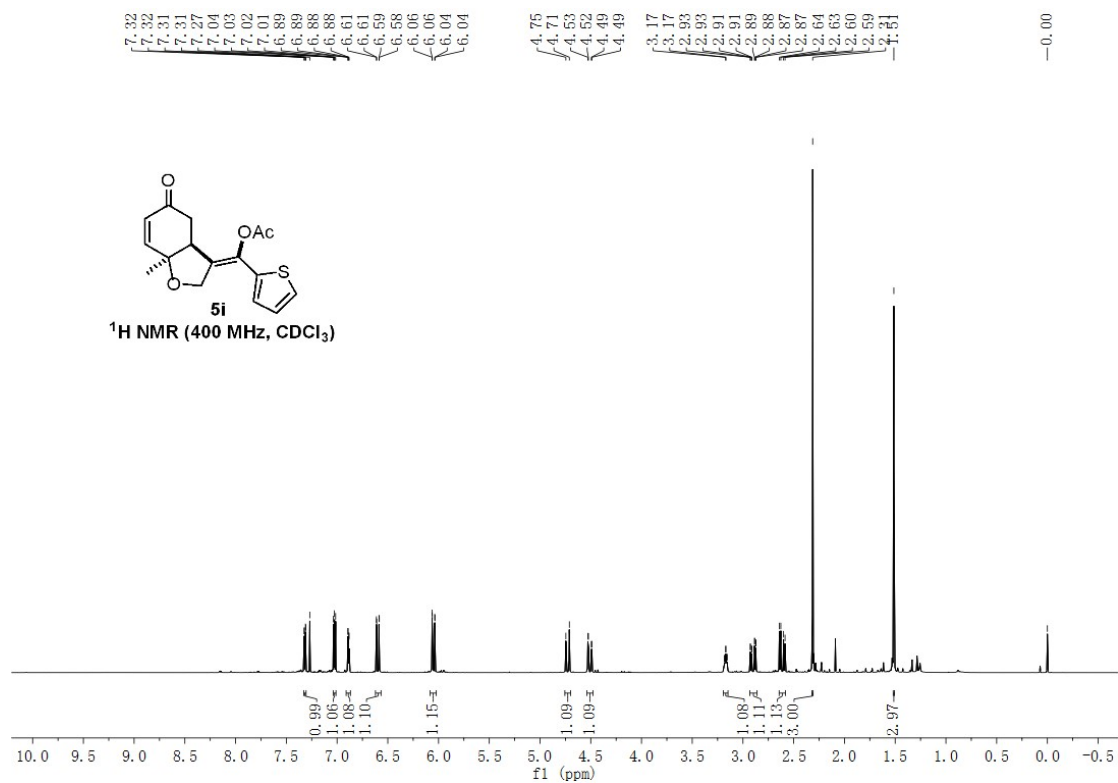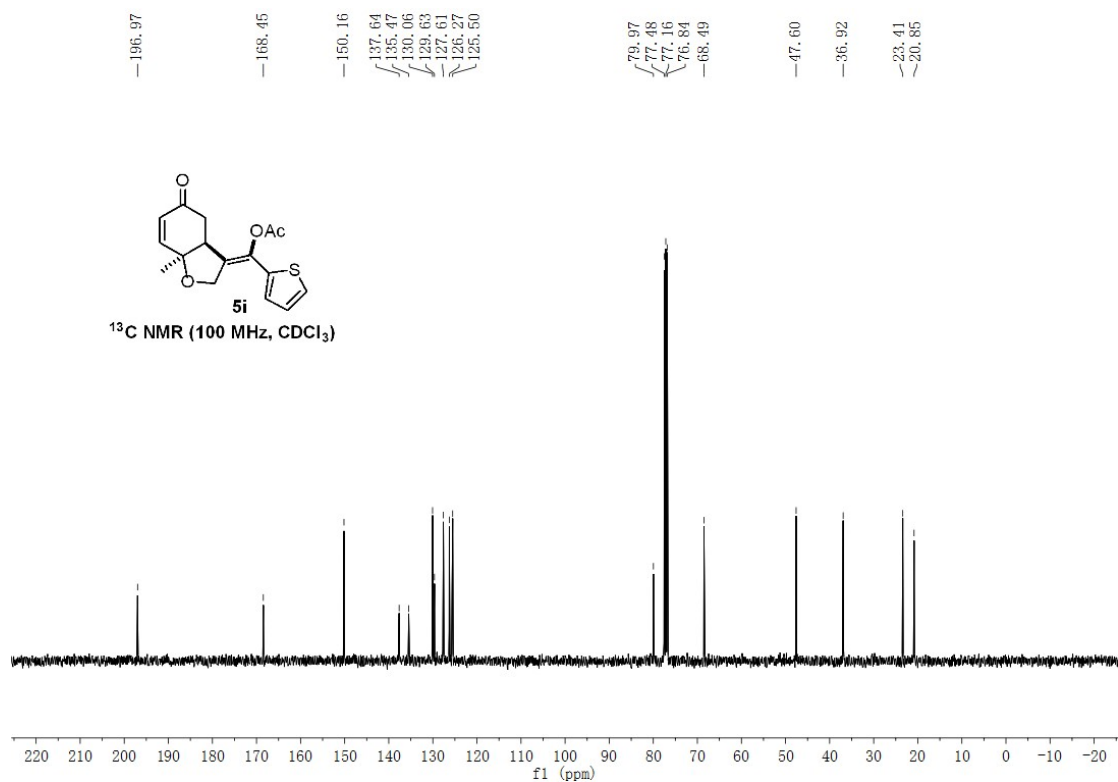

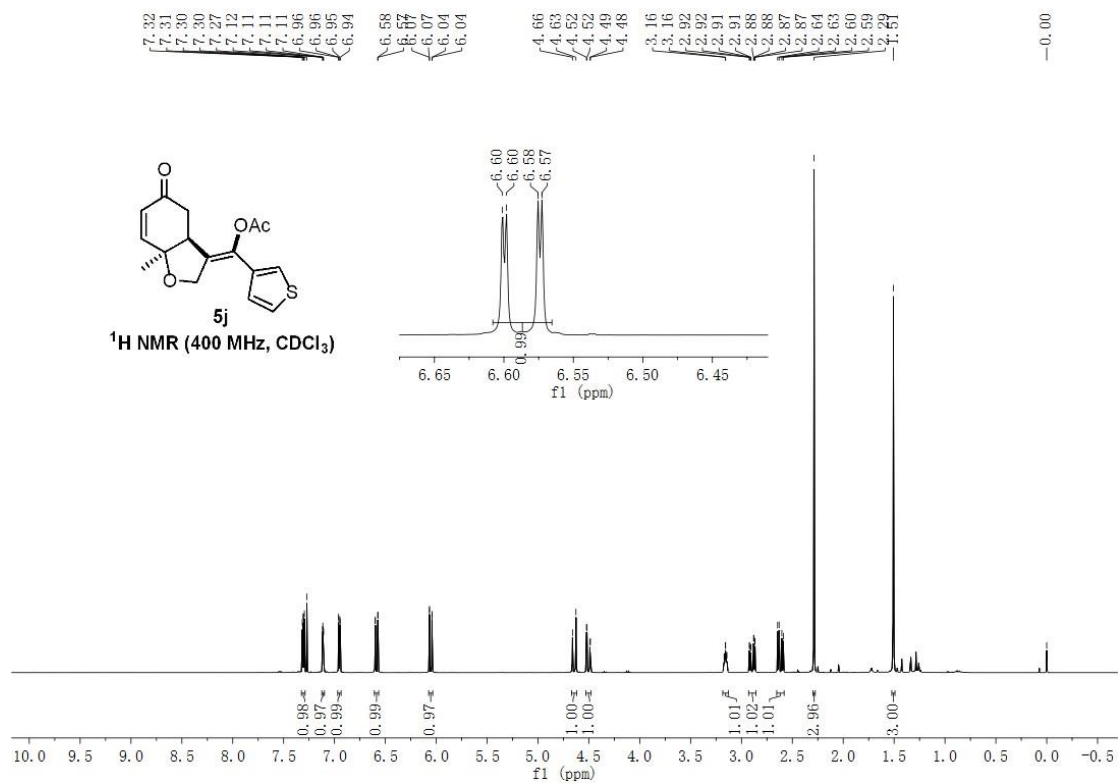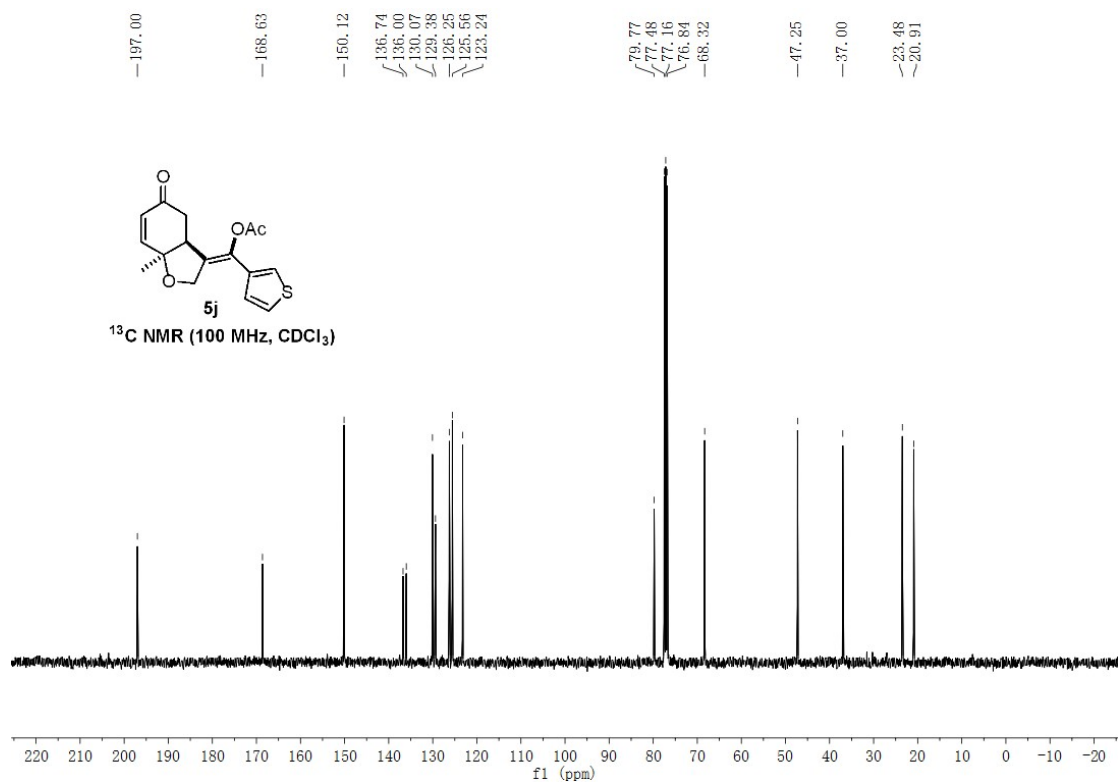



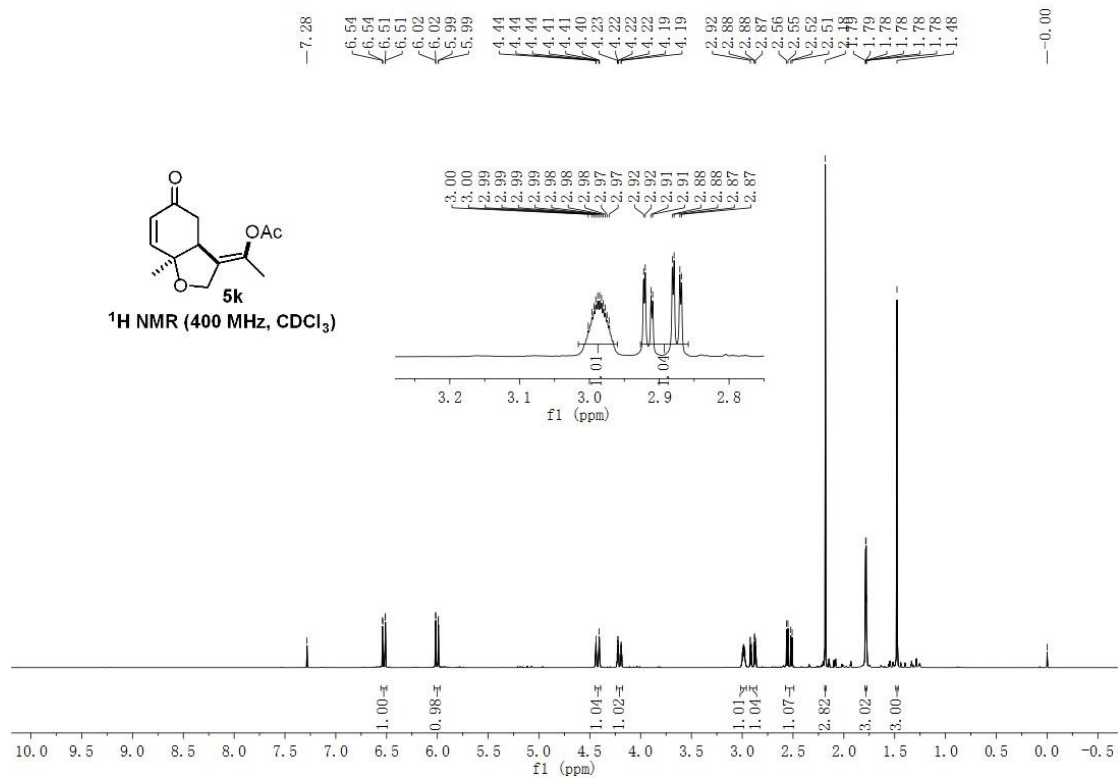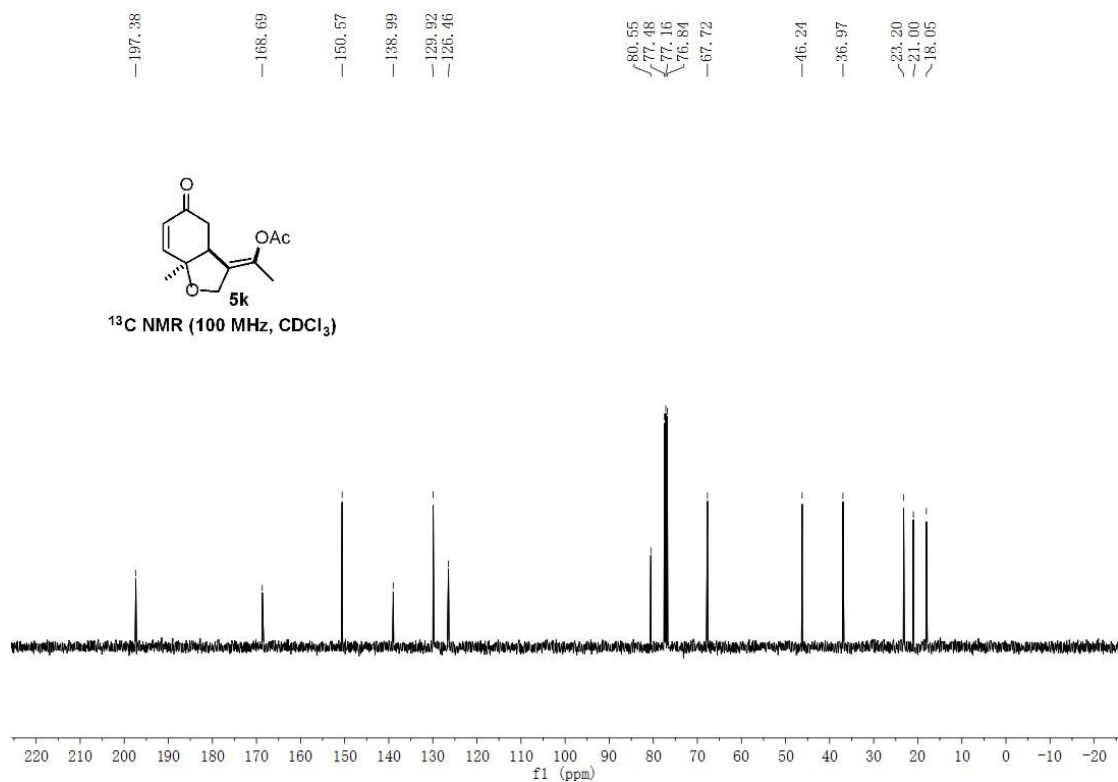

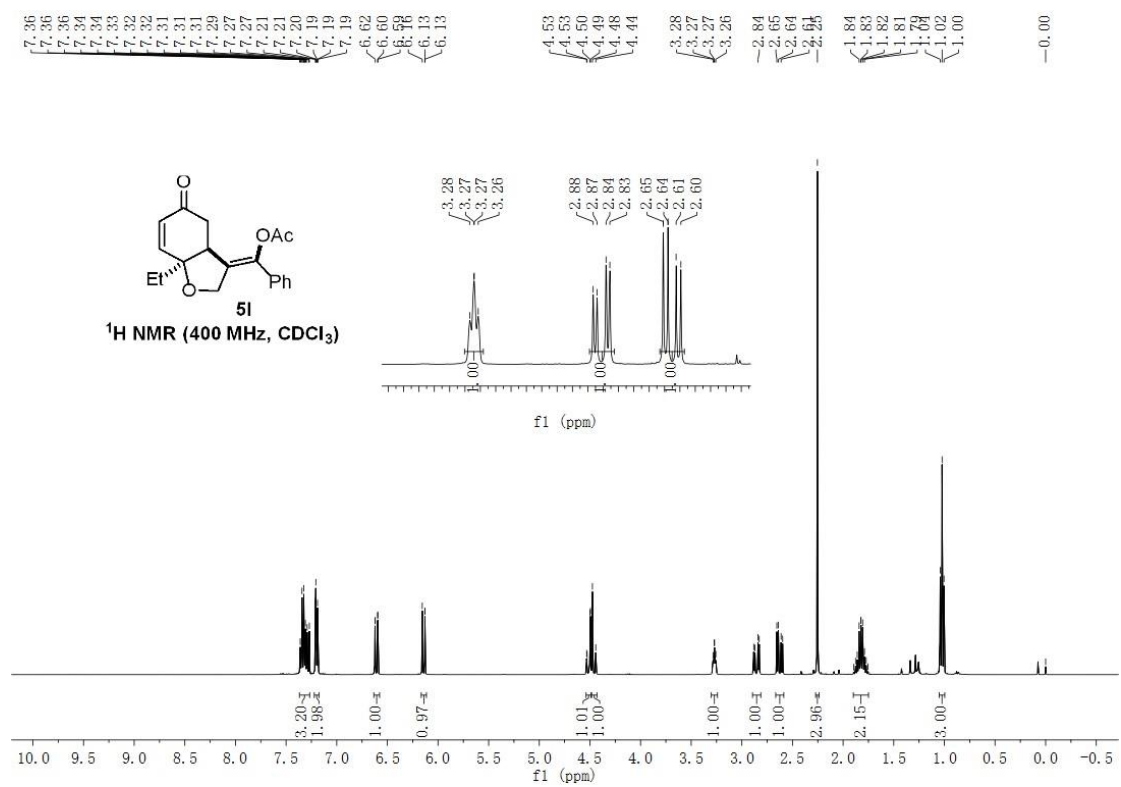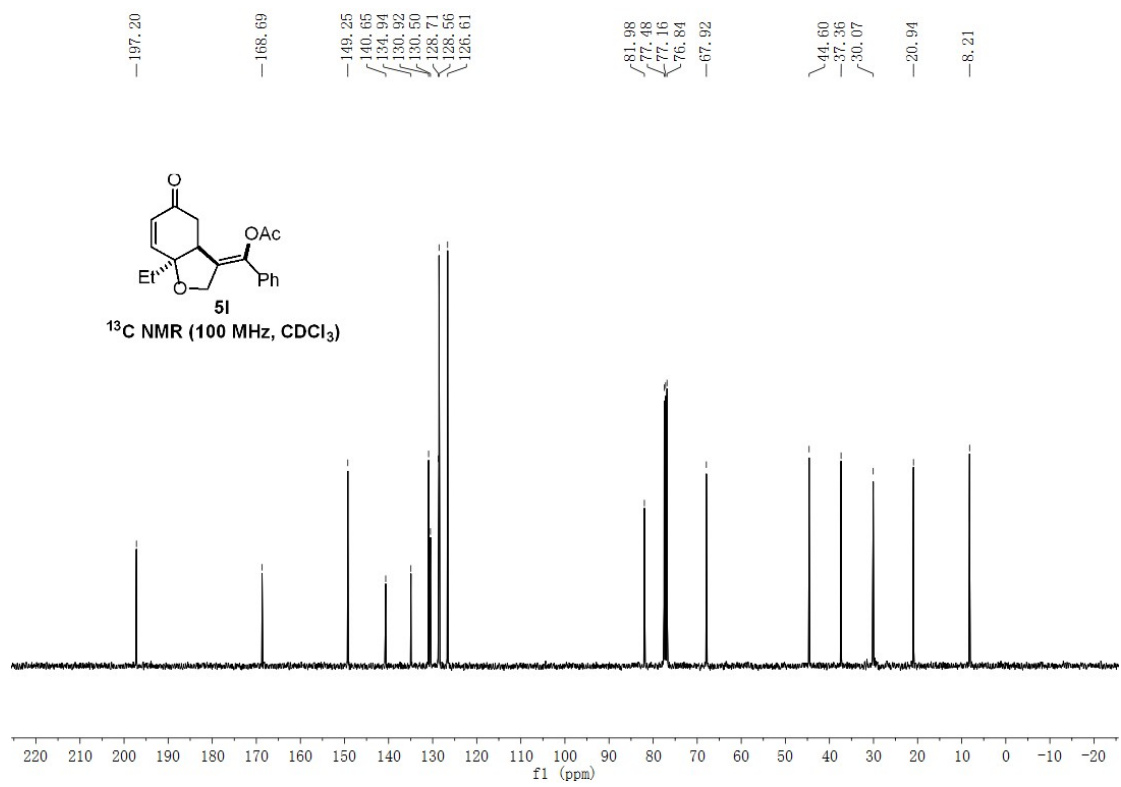

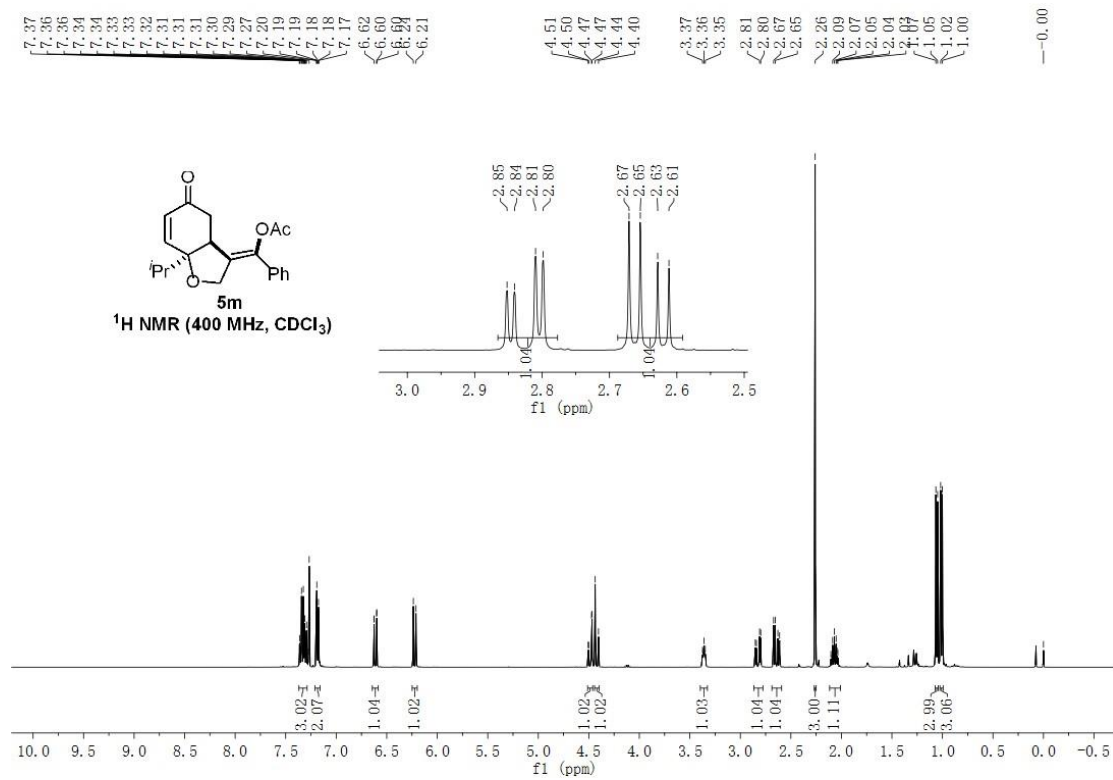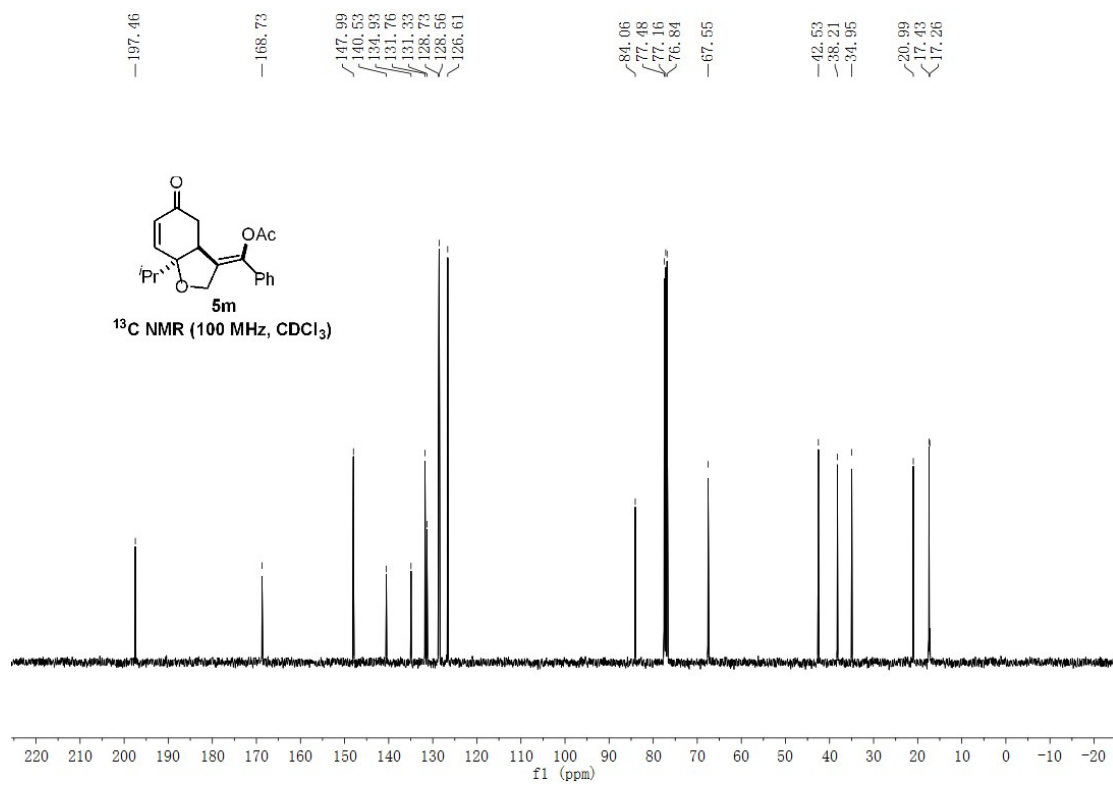

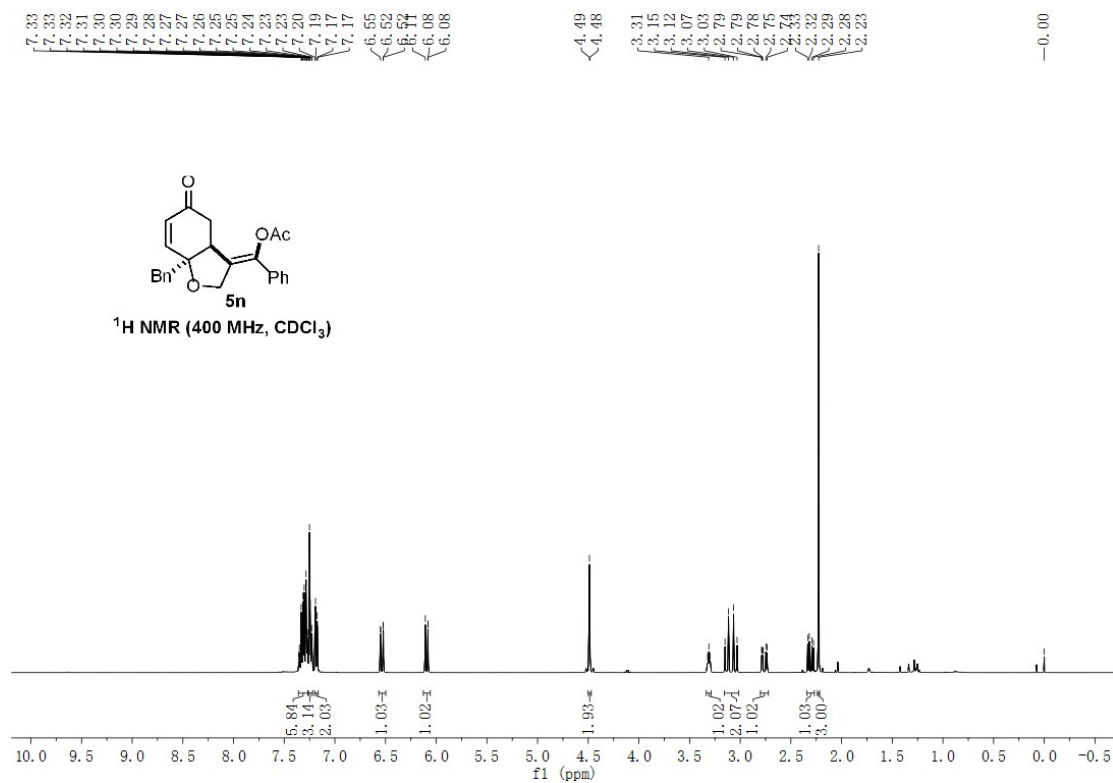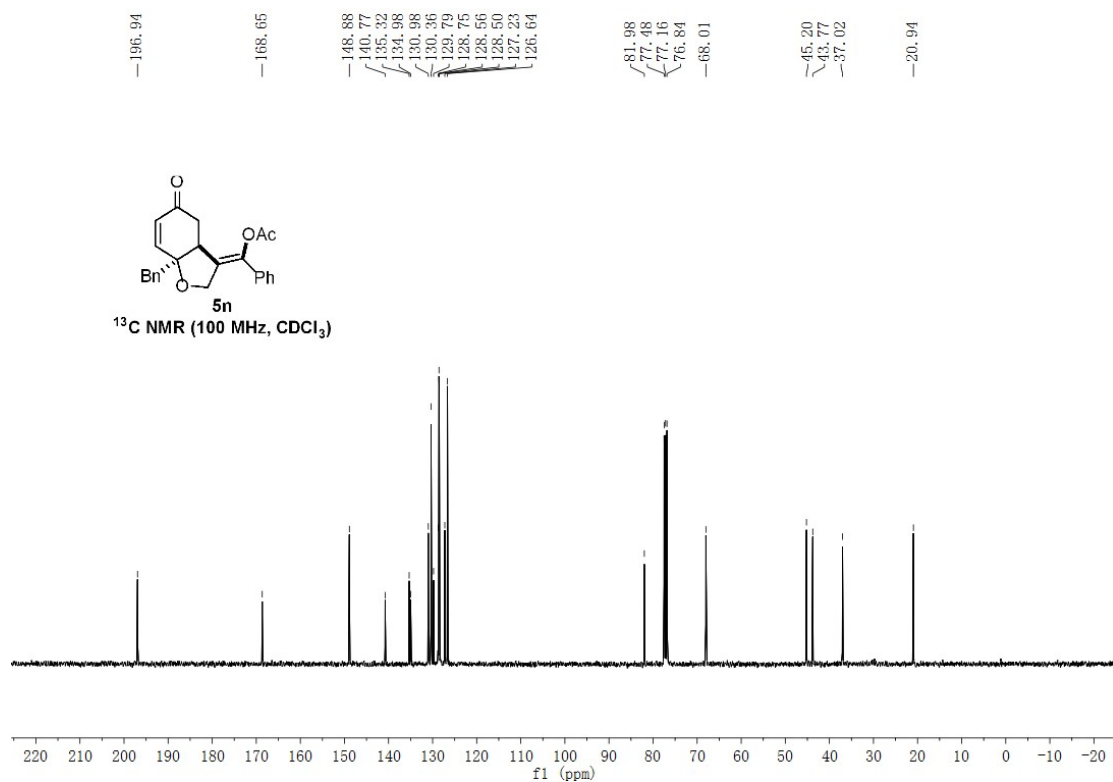

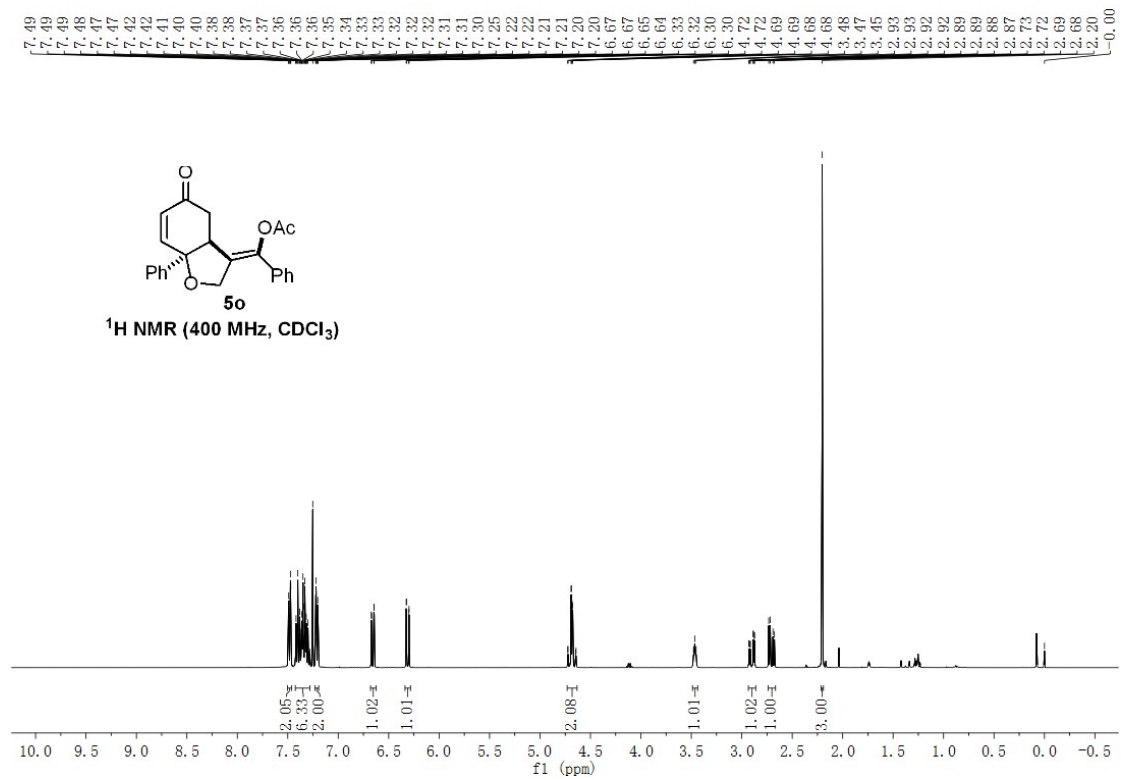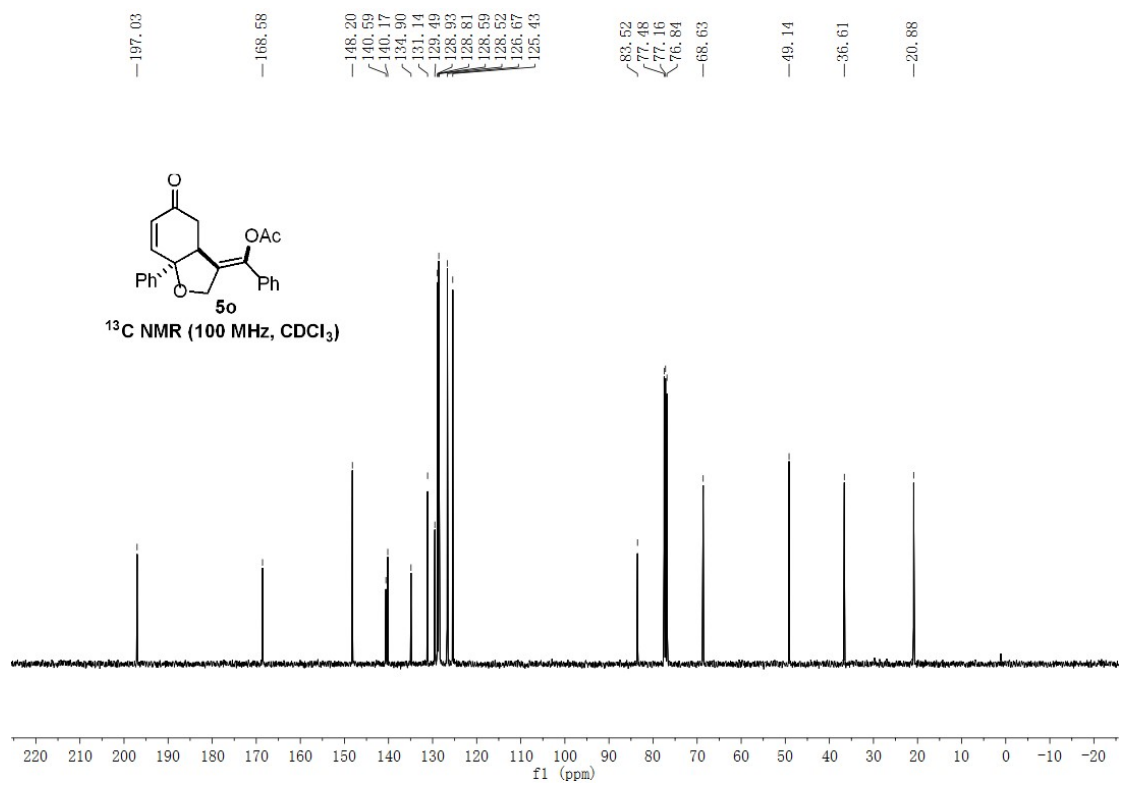

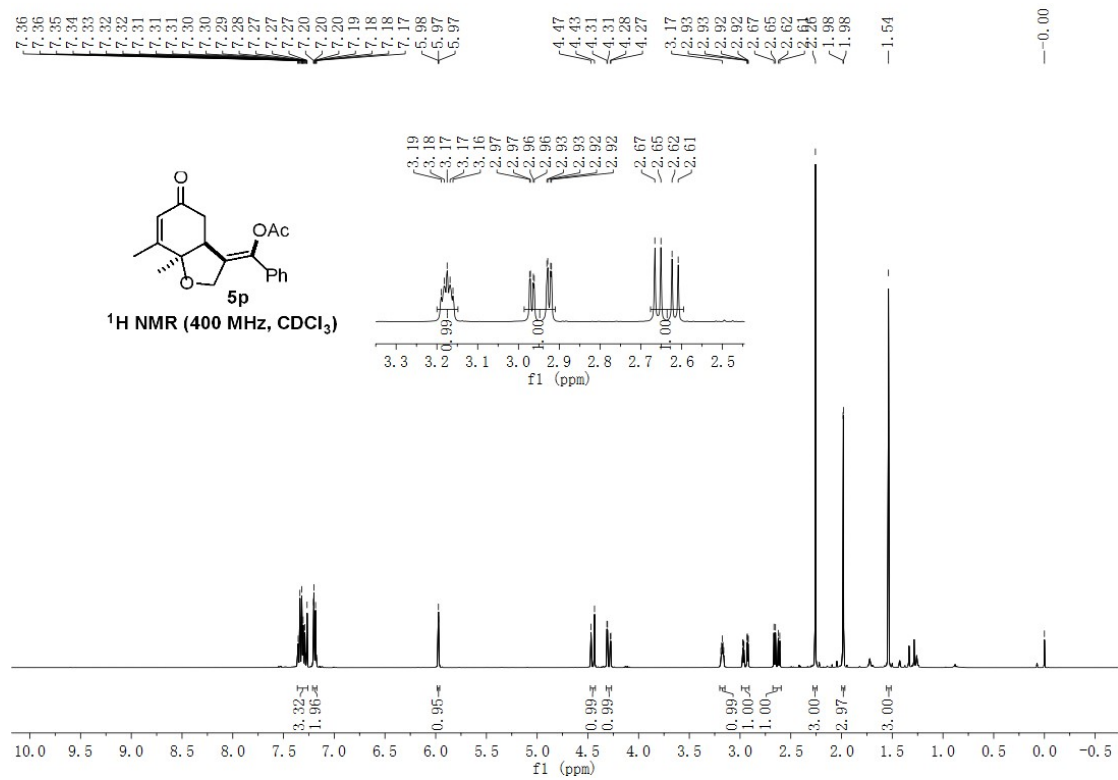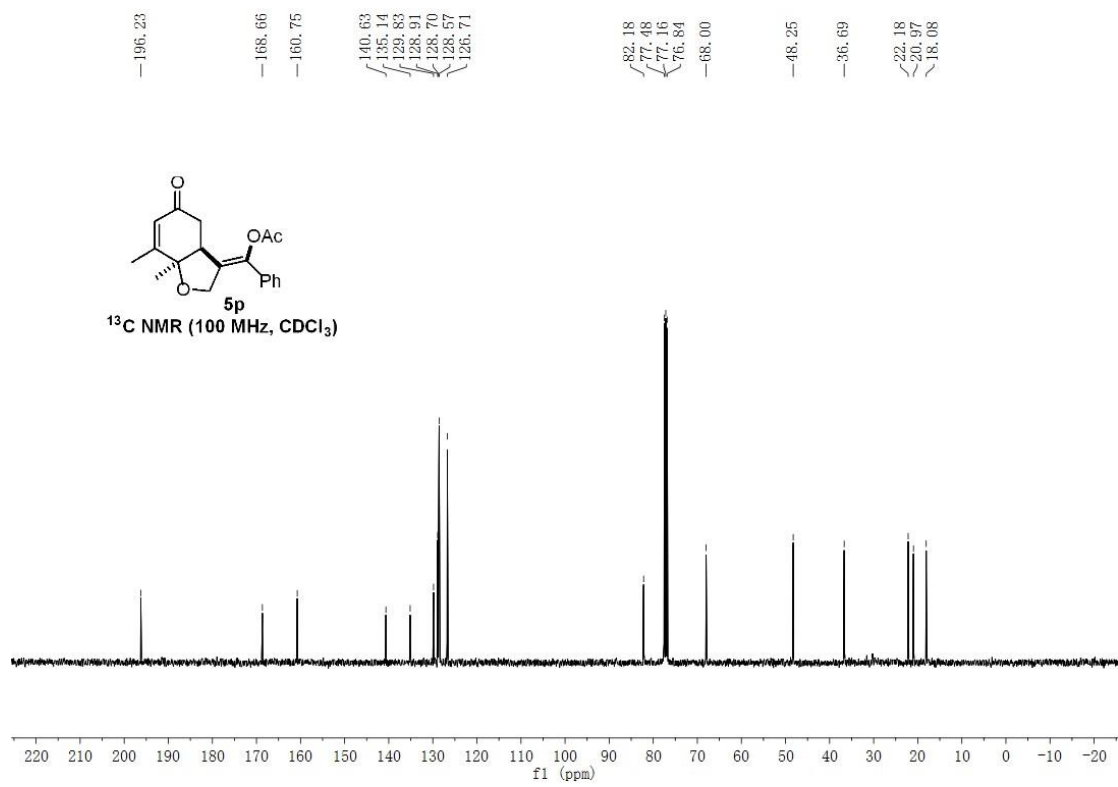

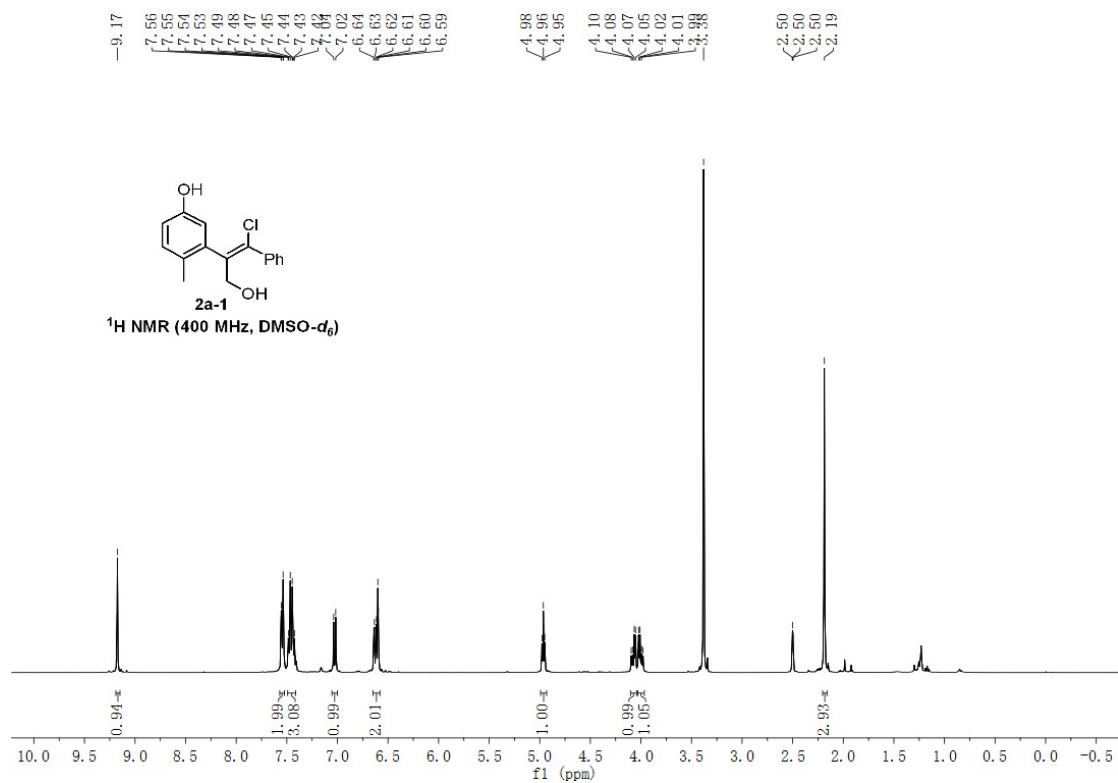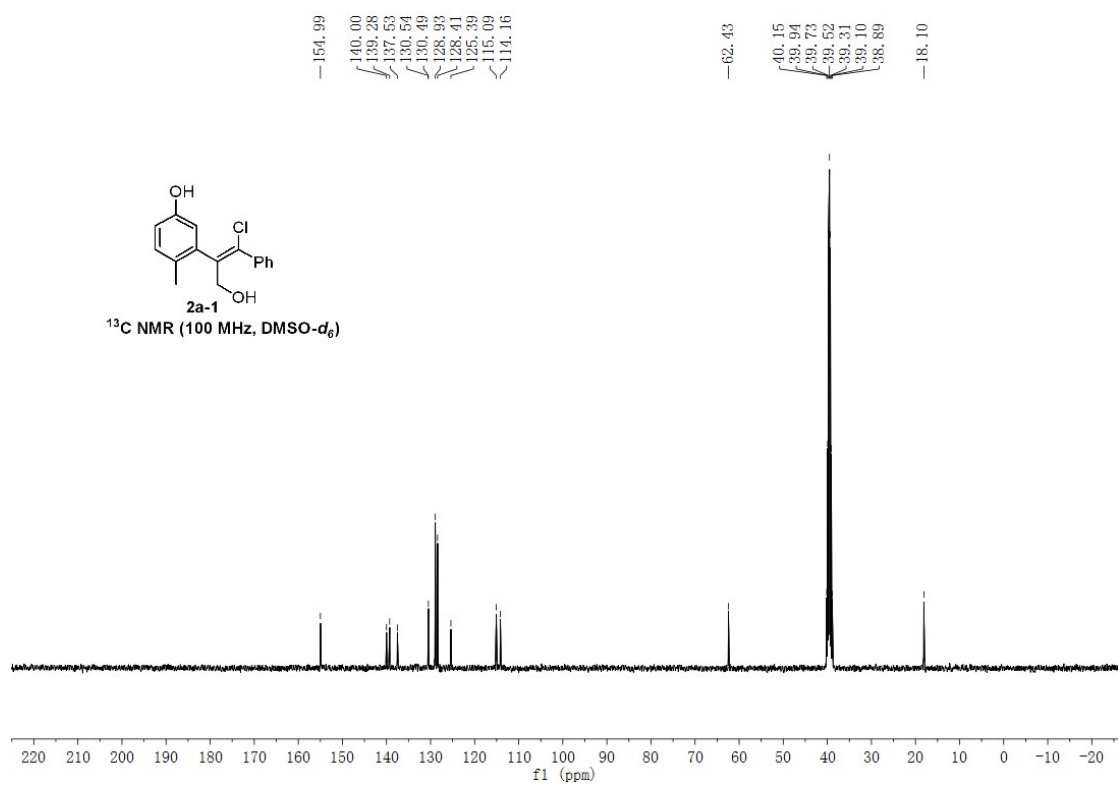

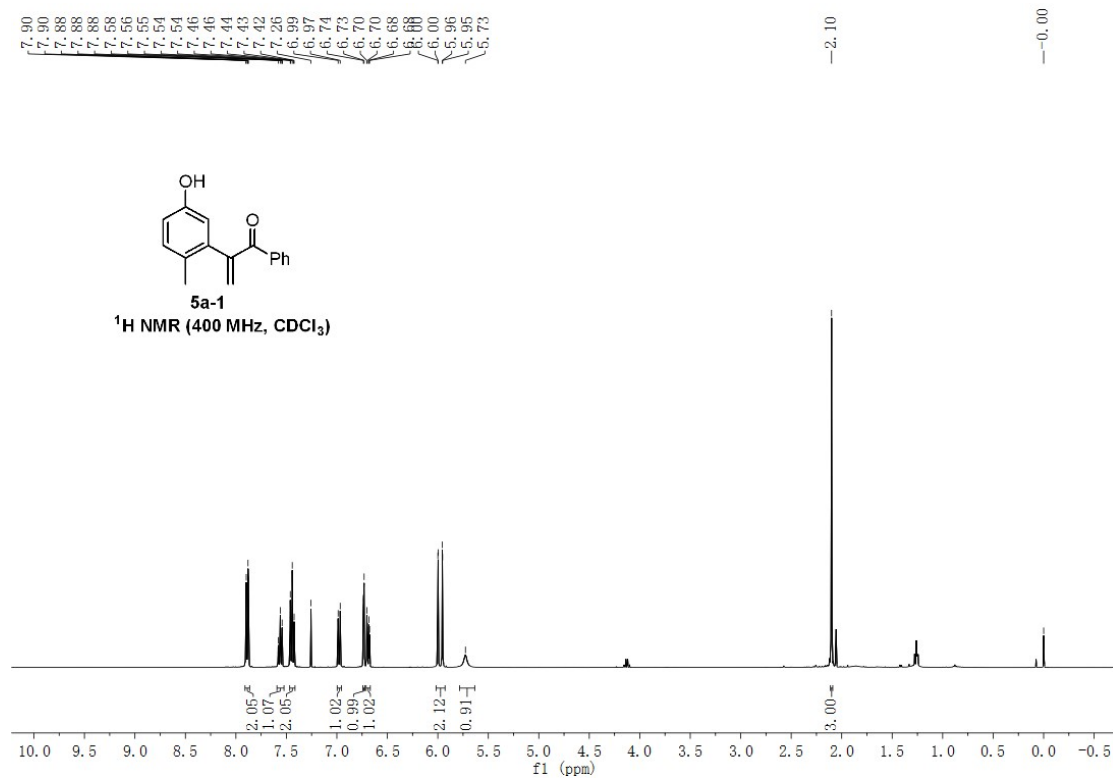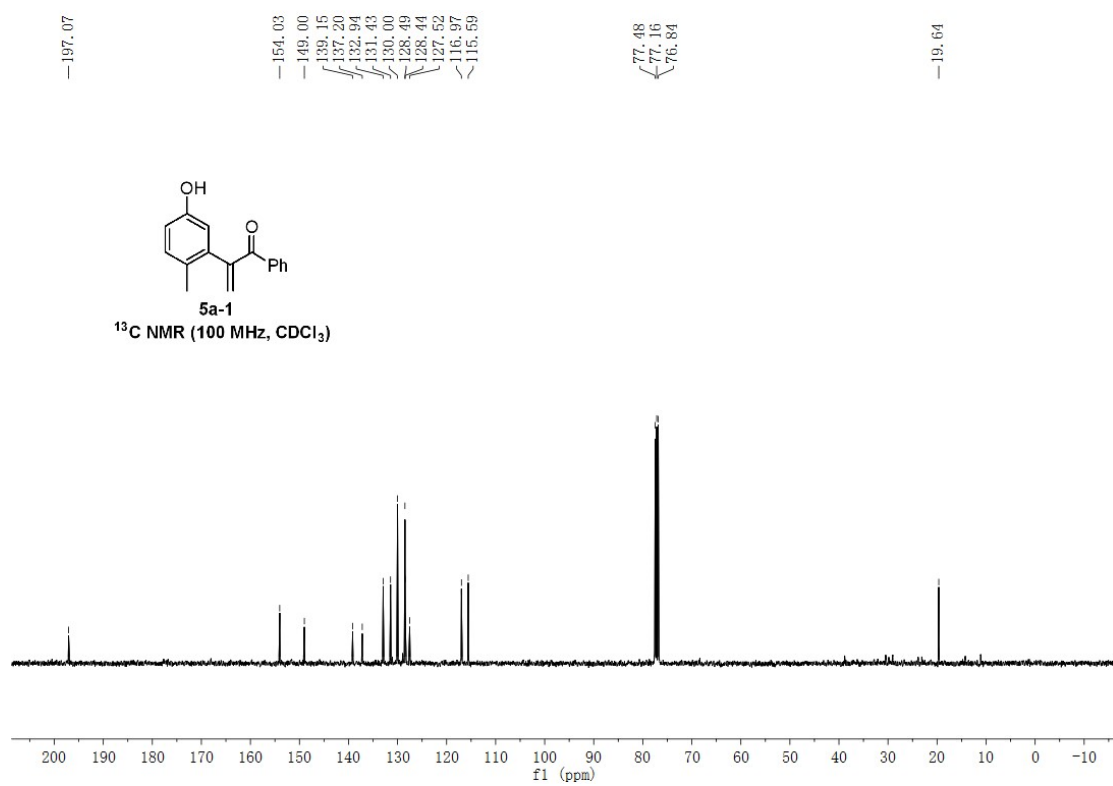



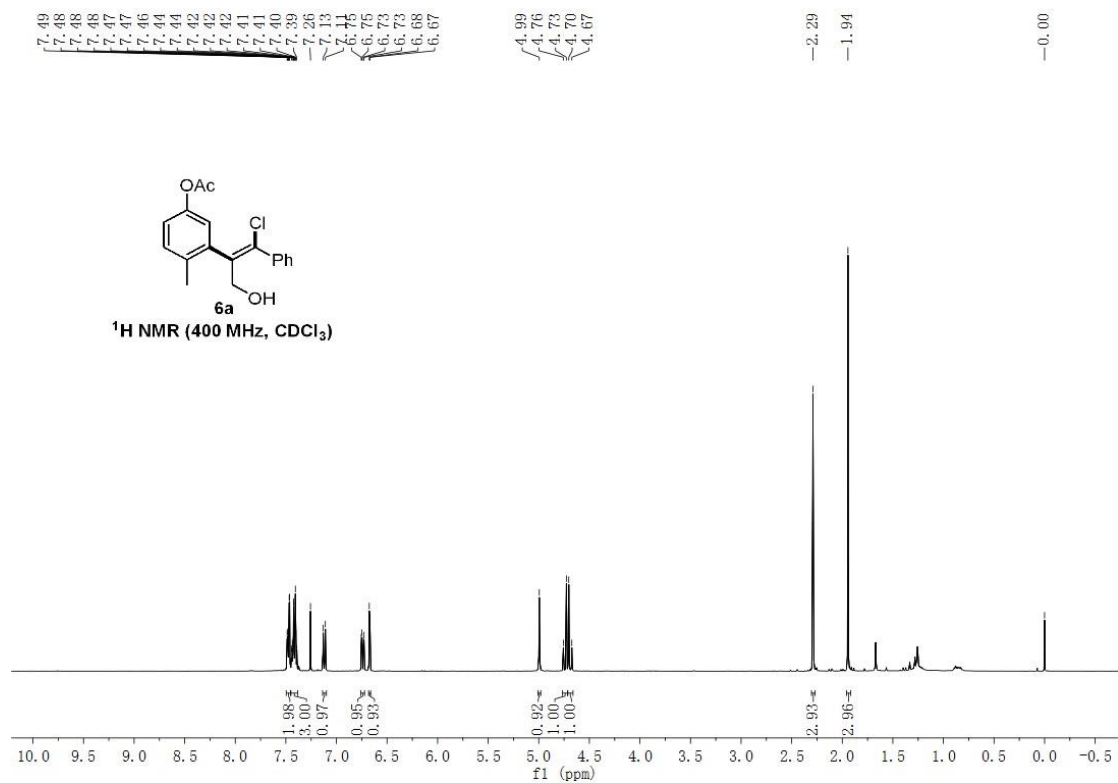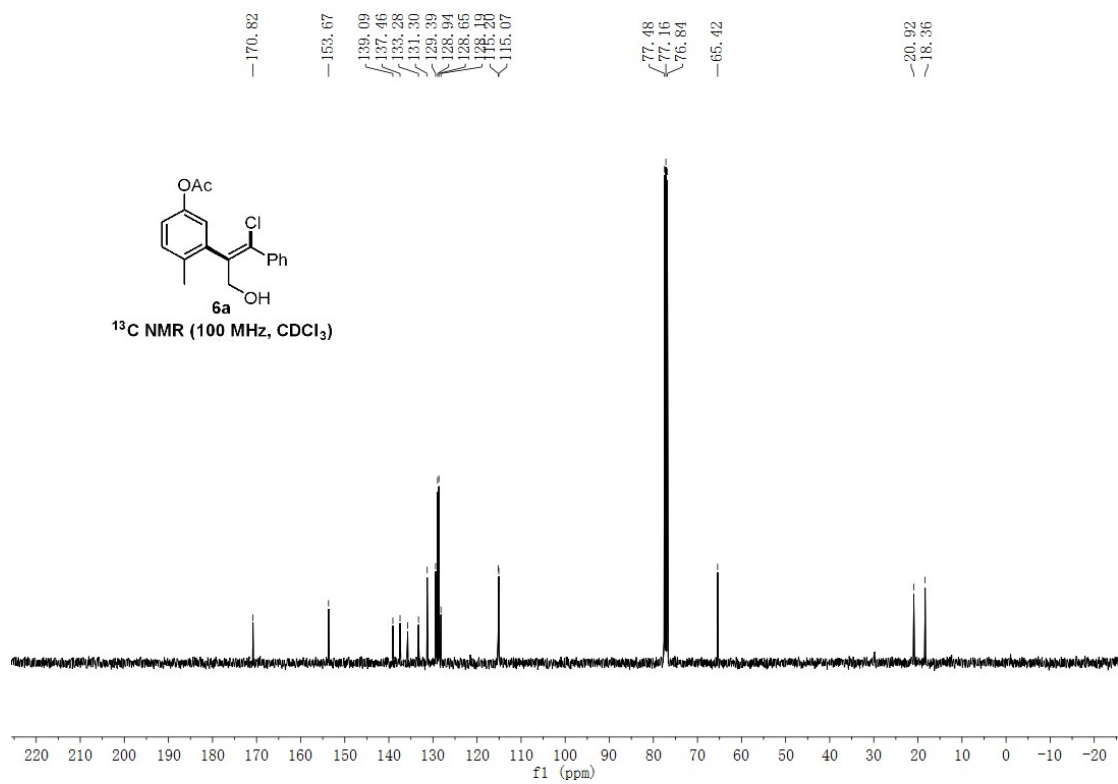

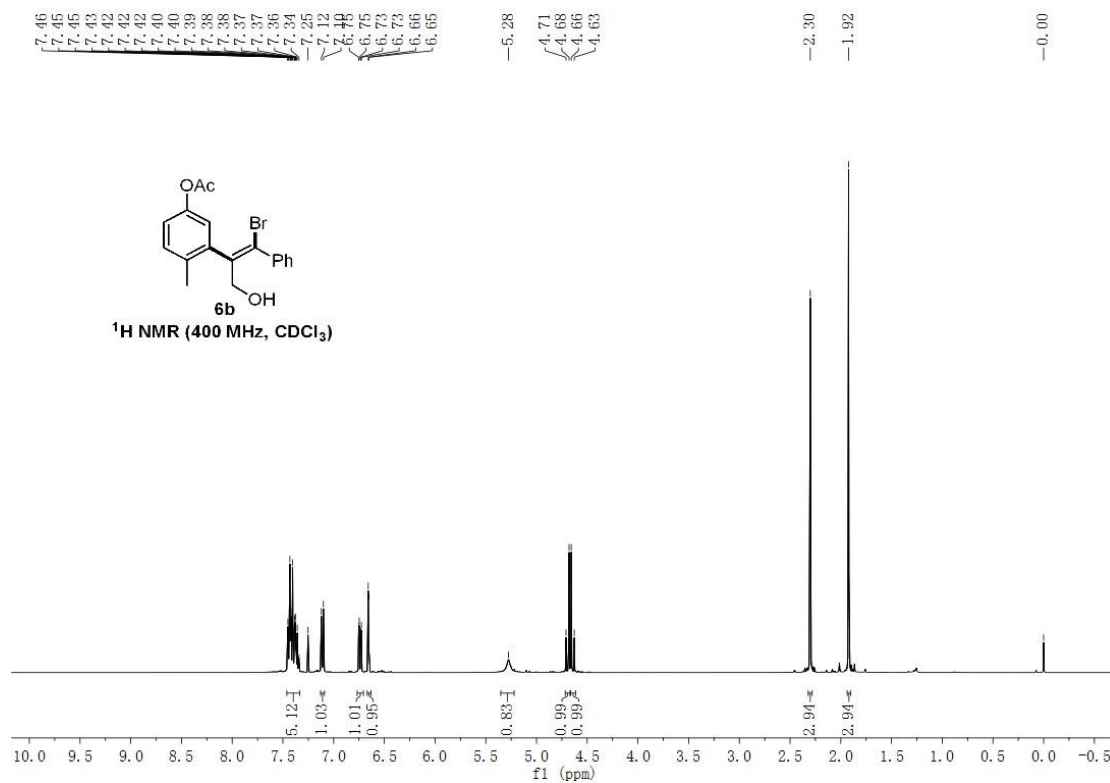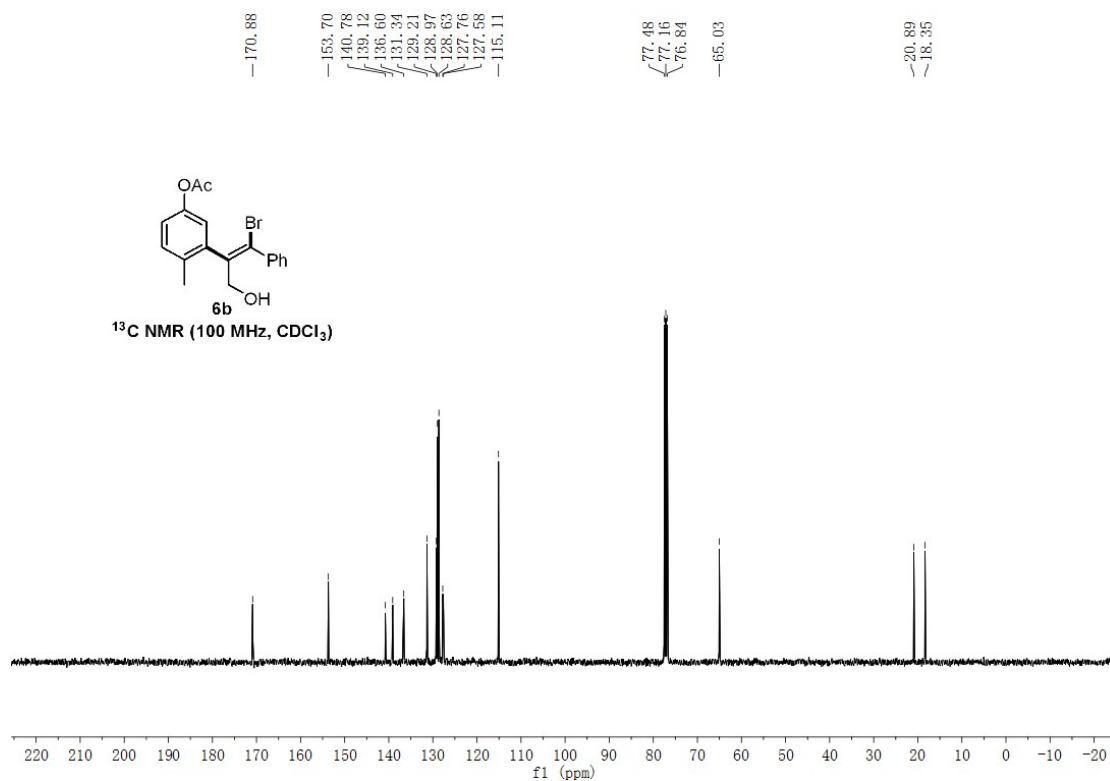

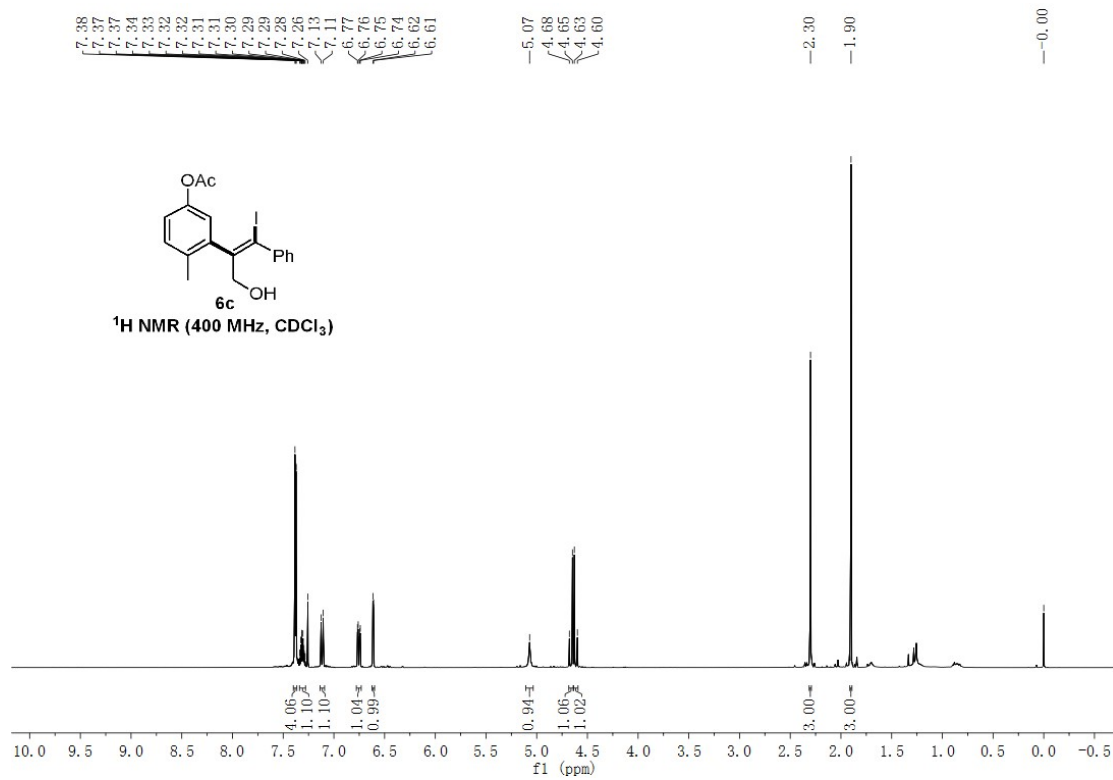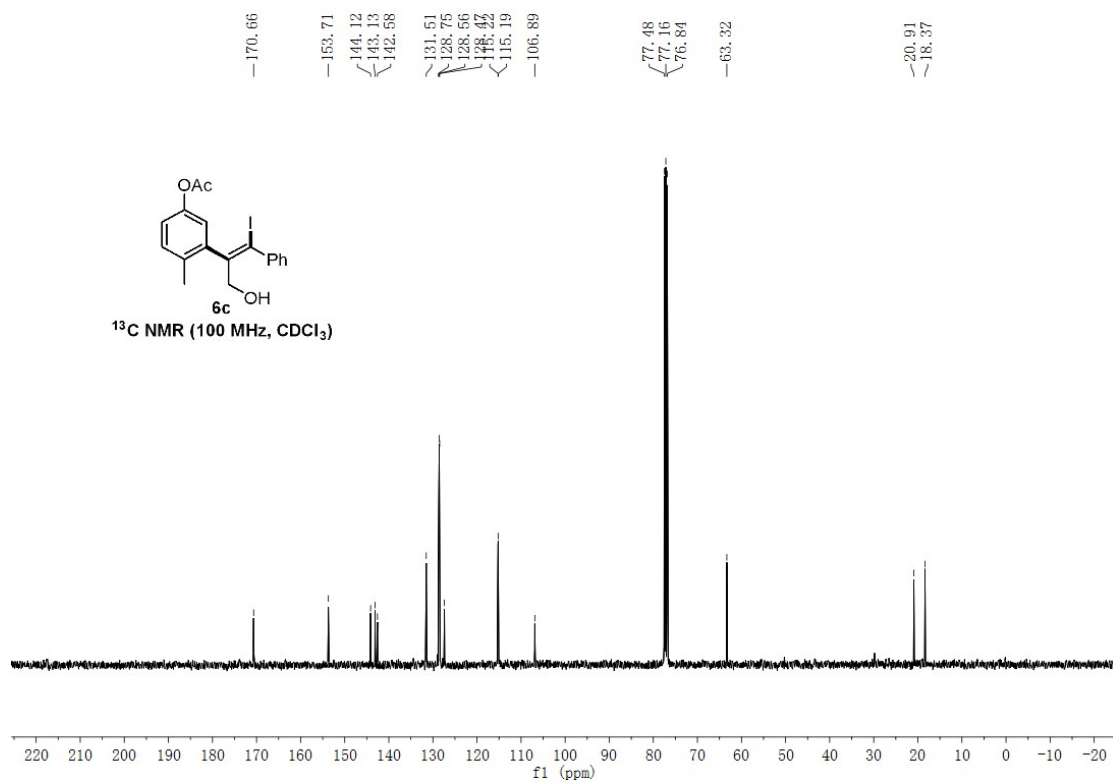

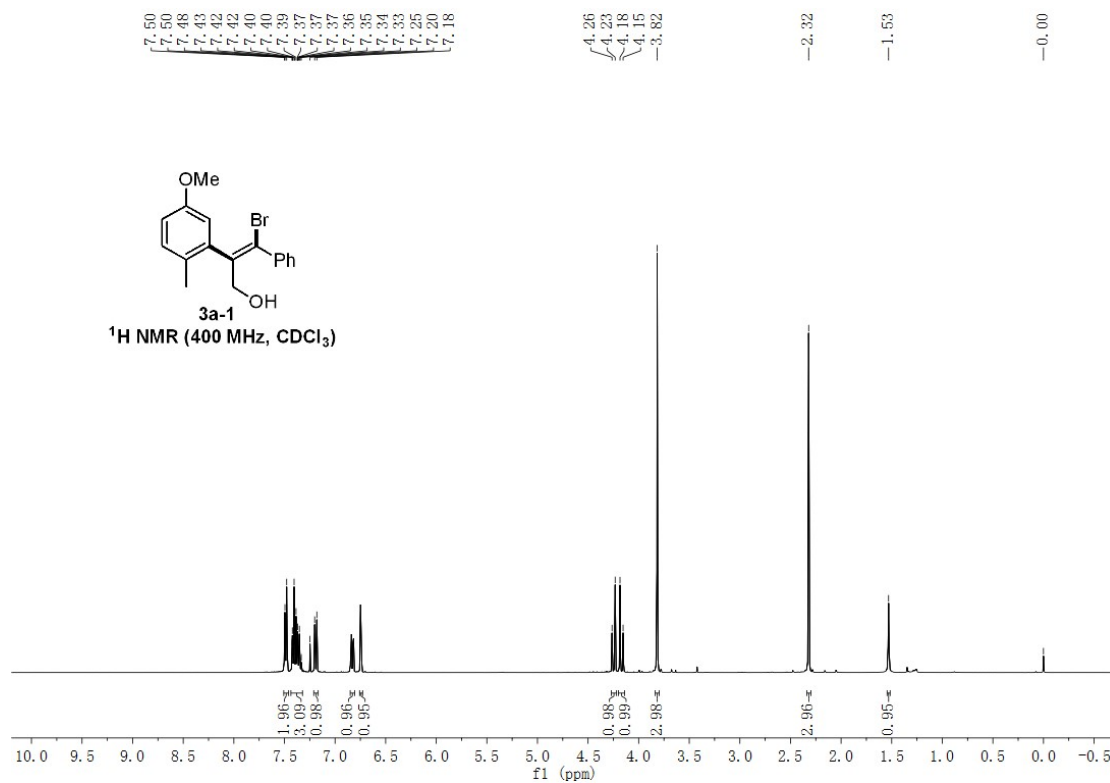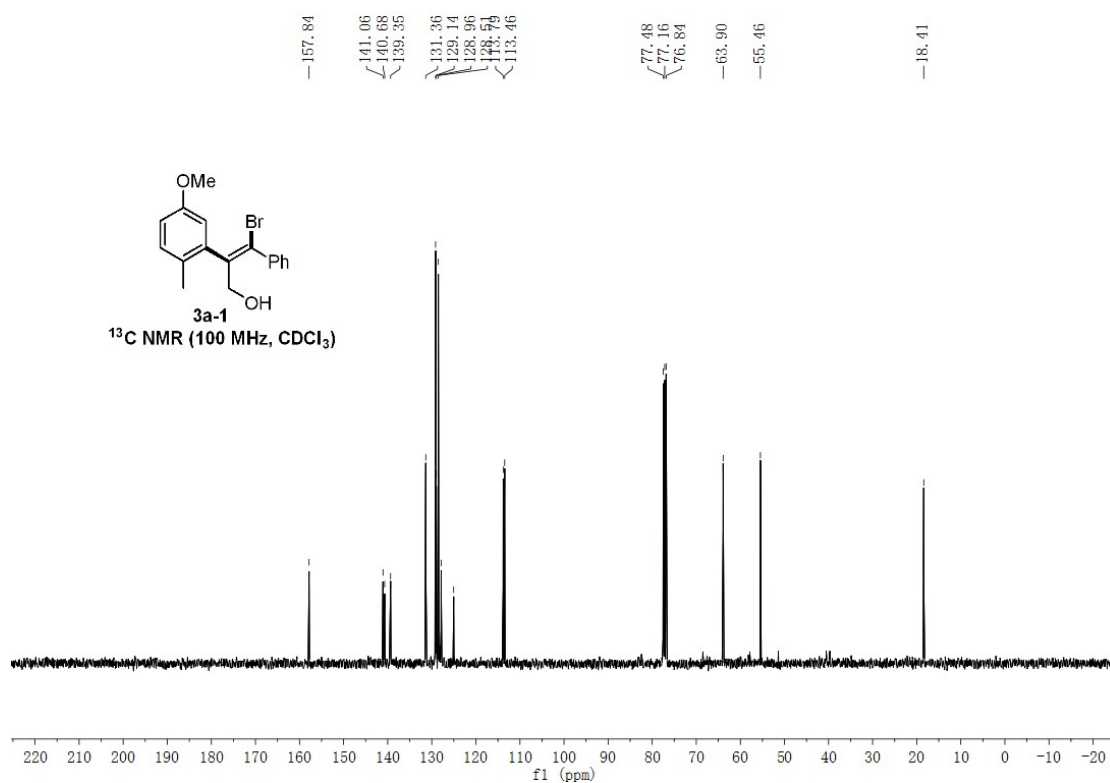

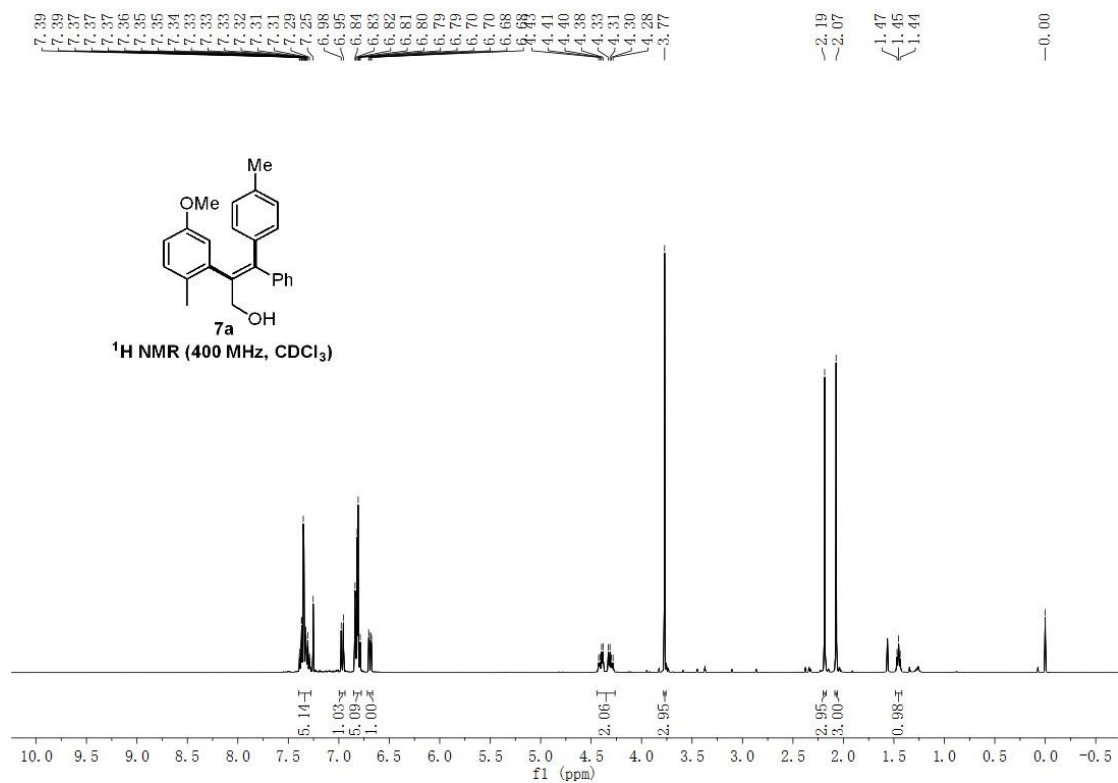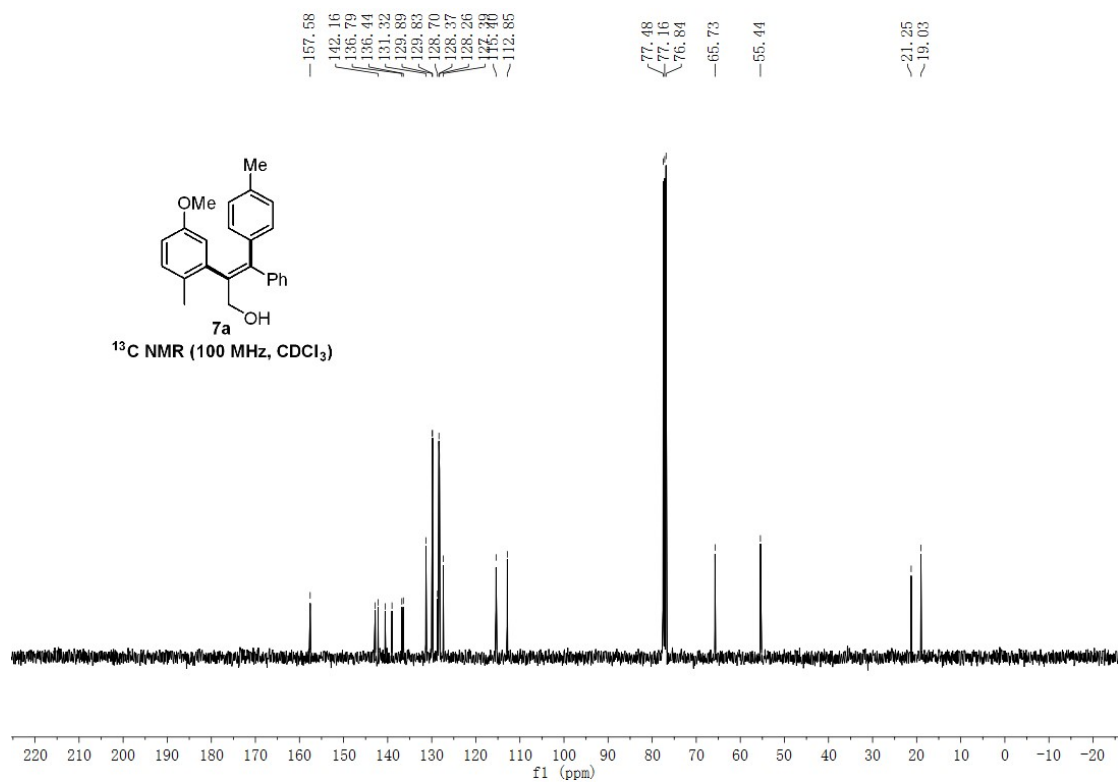

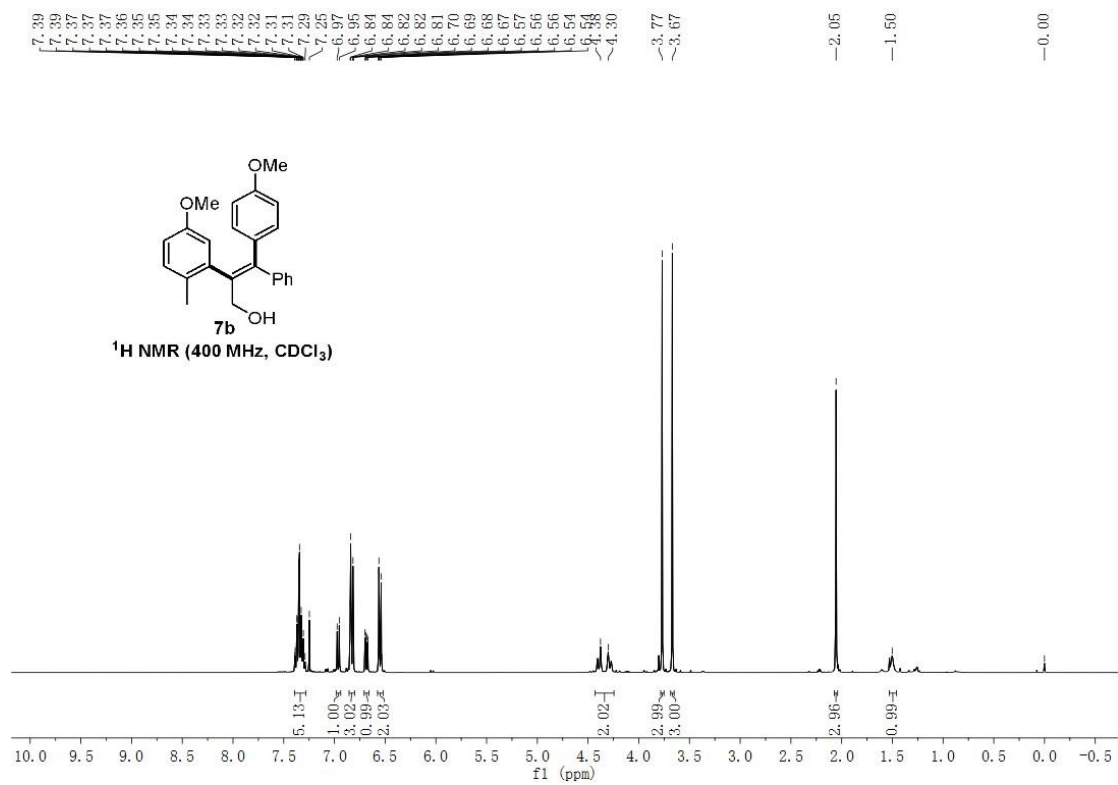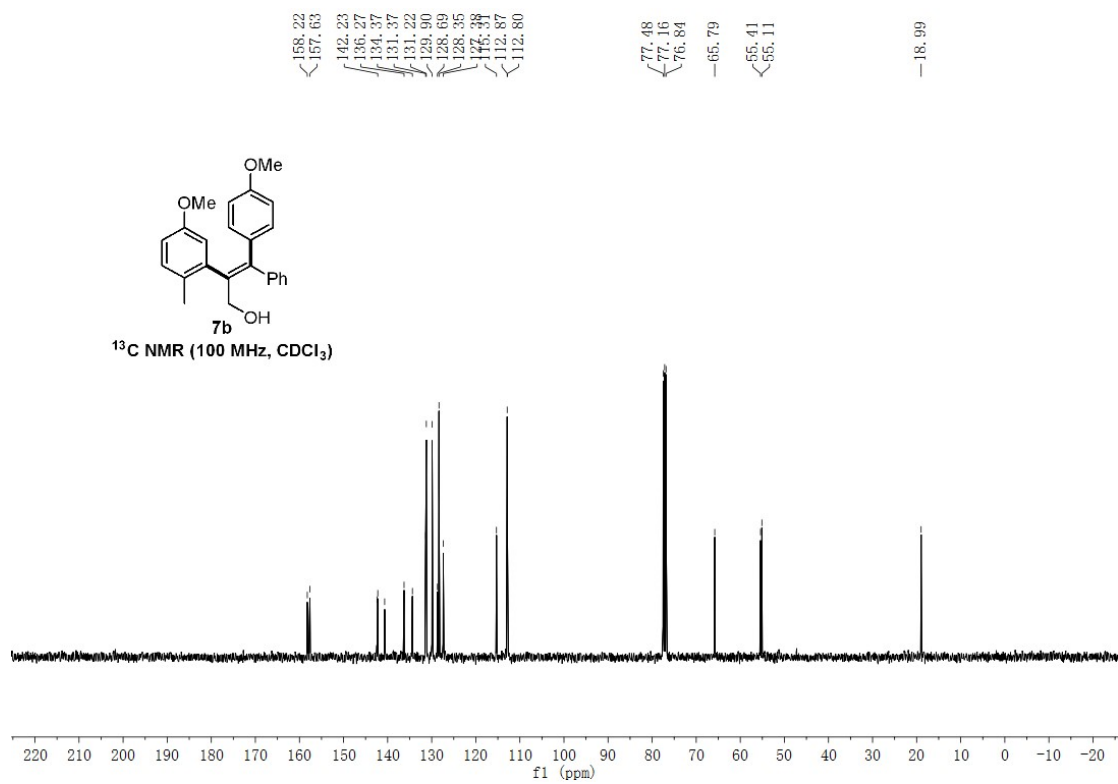

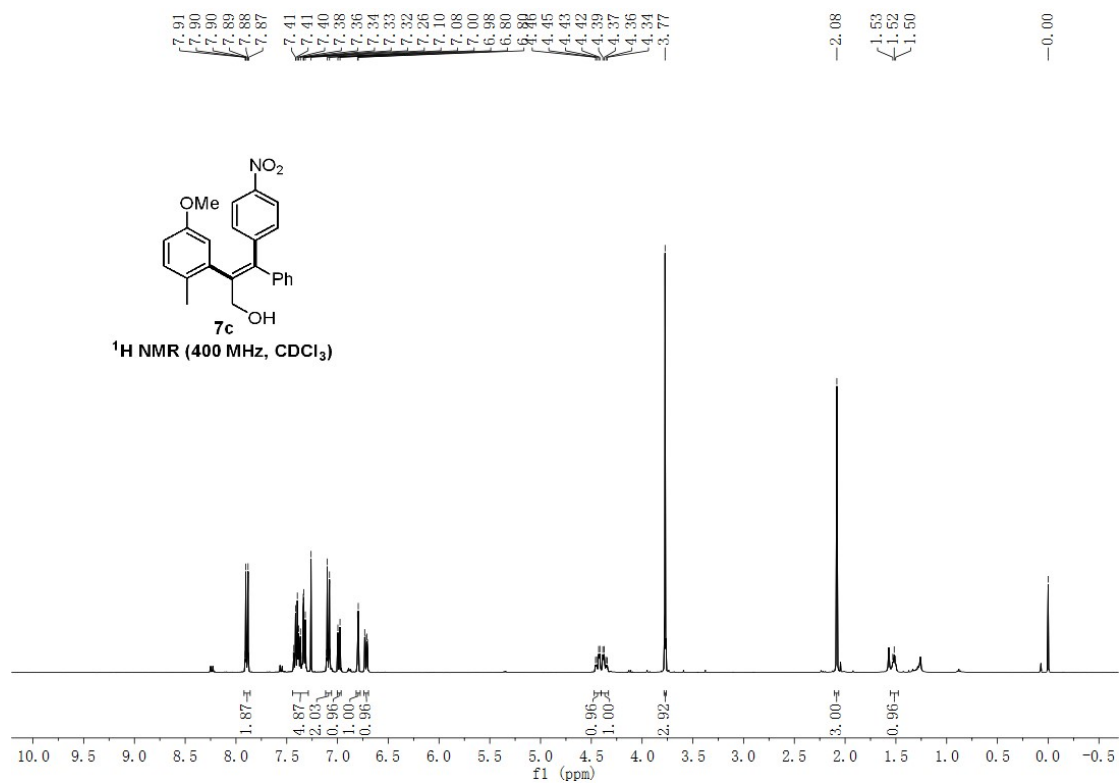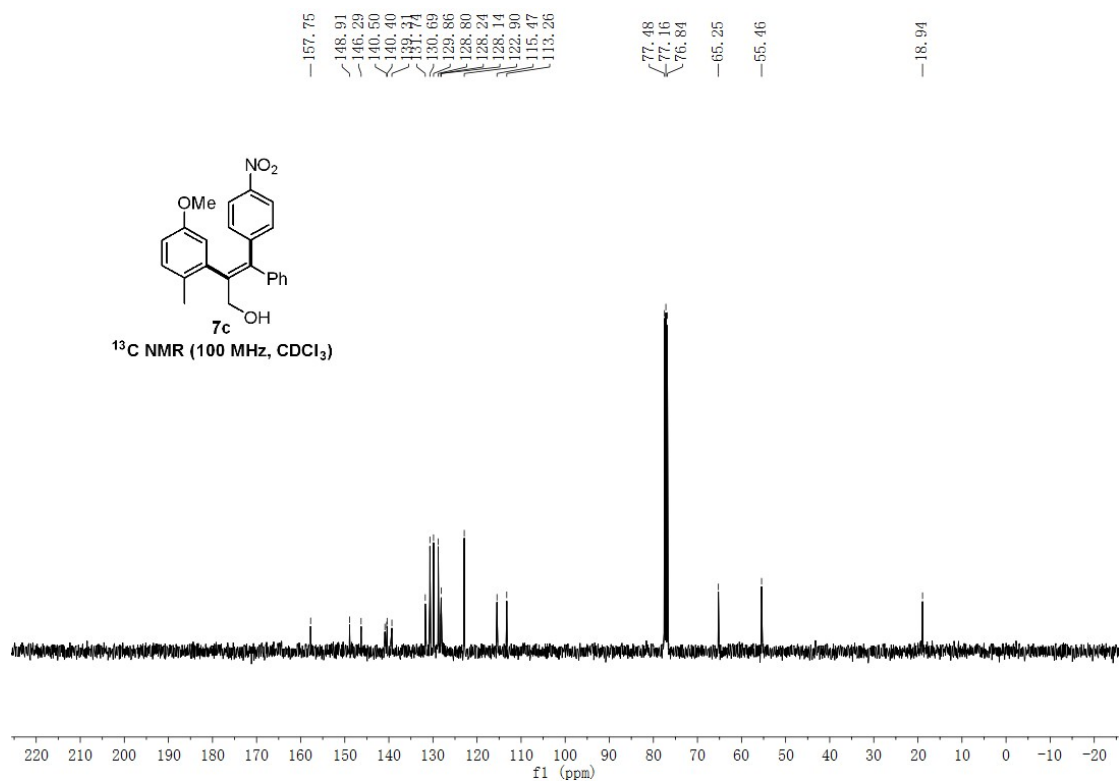

Supplement: d4qo00105b1.pdf [file d4qo00105b1.pdf]
